# Supplementary material for: Four novel algal virus genomes discovered from Yellowstone Lake metagenomes
Source: PubMed Central journal article supplement (PMC4602308; doi:10.1038/srep15131), 2015-10-13

Supplementary data

**Four novel algal virus genomes discovered from  
Yellowstone Lake metagenomes**

Weijia Zhang<sup>a</sup>, Jinglie Zhou<sup>a,b</sup>, Taigang Liu<sup>c</sup>, Yongxin Yu<sup>a,d</sup>, Yingjie Pan<sup>a,d,e</sup>,

Shuling Yan<sup>a,f</sup>, Yongjie Wang<sup>a,d,e\*</sup>

<sup>a</sup> College of Food Science and Technology, Shanghai Ocean University, Shanghai, China;

<sup>b</sup> Department of Biological Sciences, Auburn University, Auburn, AL, USA;

<sup>c</sup> College of Information Technology, Shanghai Ocean University, Shanghai, China;

<sup>d</sup> Laboratory of Quality and Safety Risk Assessment for Aquatic Products on Storage & Preservation,  
Ministry of Agriculture, Shanghai, China;

<sup>e</sup> Shanghai Engineering Research Center of Aquatic-Product Processing & Preservation, Shanghai,  
China;

<sup>f</sup> Institute of Biochemistry and Molecular Cell Biology, University of Göttingen, Göttingen, Germany;

**Table S1** Data on metagenomic assemblies of four YSL sequences

| Name   | No. of reads recruited to each genome | No. of identical sites | Pairwise identity (%) | Genome Coverage |         |         | Size of dataset (Gb) |
|--------|---------------------------------------|------------------------|-----------------------|-----------------|---------|---------|----------------------|
|        |                                       |                        |                       | Mean            | Minimum | Maximum |                      |
| YSLPV1 | 17,474                                | 163,529                | 98.5                  | 32.0            | 1       | 107     | 11.1                 |
| YSLPV2 | 14,874                                | 157,105                | 97.5                  | 32.8            | 1       | 172     | 11.1                 |
| YSLPV3 | 13,946                                | 157,872                | 98.4                  | 28.8            | 1       | 79      | 11.1                 |
| YSLGV  | 3,018                                 | 69,407                 | 98.0                  | 13.8            | 1       | 46      | 11.1                 |

**Table S2** ORFs and their homologs predicted in YSLPVs and YSLGV

| ID     | Position |       | Length |     | BlastP hit in GenBank nr and/or viruses data set      |                                                                    |              |             |          |                                             | NCBI conserved domain (ID, E-value, alignment length in aa, alignment start - end position)        | Interproscan matches (ID, E-value, alignment start - end position)                                                                                                                                                                                             |
|--------|----------|-------|--------|-----|-------------------------------------------------------|--------------------------------------------------------------------|--------------|-------------|----------|---------------------------------------------|----------------------------------------------------------------------------------------------------|----------------------------------------------------------------------------------------------------------------------------------------------------------------------------------------------------------------------------------------------------------------|
|        | start    | end   | nt     | aa  | ORF, protein encoded, or mass                         | Species                                                            | Accession    | Aa identity | E Value  | Alignment length in aa (Start-end position) |                                                                                                    |                                                                                                                                                                                                                                                                |
| YSLPV1 |          |       |        |     |                                                       |                                                                    |              |             |          |                                             |                                                                                                    |                                                                                                                                                                                                                                                                |
| 1      | 29       | 472   | 444    | 147 | ring finger protein, putative                         | Ricinus communis                                                   | XP_002522531 | 42.40%      | 2.69E-11 | 63(1-63)                                    | RING superfamily(cd00162, 7.94e-12,44,2-45)<br>Zinc finger, C3HC4 type(pfam13923,2.89e-09,42,2-43) | zf-RING_2(PF13639,7.5E-16 2-43)                                                                                                                                                                                                                                |
| 2      | 435      | 641   | 207    | 68  |                                                       |                                                                    |              |             |          |                                             |                                                                                                    |                                                                                                                                                                                                                                                                |
| 3      | 870      | 1,412 | 543    | 180 |                                                       |                                                                    |              |             |          |                                             |                                                                                                    |                                                                                                                                                                                                                                                                |
| 4      | 1,524    | 2,144 | 621    | 206 | hypothetical protein MpV1_231c<br>PhoH-like protein   | Micromonas sp. RCC1109 virus<br>MpV1<br>Synechococcus sp. PCC 7002 | YP_004062114 | 51.20%      | 3.91E-67 | 201(5-205)                                  | PhoH(pfam02562,2.92e-85,205,1-205)                                                                 | PhoH(PF02562,PhoH 1.3E-69 2-205)                                                                                                                                                                                                                               |
| 5      | 2,197    | 3,297 | 1,101  | 366 | oxidoreductase domain protein<br>2OG-Fe(II) oxygenase | Caenispirillum salinarum AK4<br>Cyanophage Syn30                   | ZP_18917440  | 45.00%      | 2.00E-31 | 155(212-366)                                | 2OG-FeII_Oxy_3 Superfamily(cl17304,8.09e-15,83,279-361)                                            | P-loop containing nucleoside triphosphate hydrolases(SSF52540,1.3E-28 2-181)<br>Prolyl 4-hydroxylase alpha subunit homologue(SM00702,4.3E-5,186-361)<br>PKHD-TYPE<br>HYDROXYLASE(PTHR30496,2.1E-6,188-361)<br>Clavamate synthase-like(SSF51197,5.5E-6,188-358) |
| 6      | 3,302    | 4,393 | 1,092  | 363 | 2OG-Fe(II) oxygenase<br>prolyl 4-hydroxylase          | Synechococcus phage S-SM1<br>Candidatus                            | YP_004322947 | 41.20%      | 1.37E-31 | 179(10-188)                                 | 2OG-FeII_Oxy_3 Superfamily(cl17304,2.50e-07,139,20-158;5.75e-04,126,211-336)                       | 2OG-FeII_Oxy_3(PF13640,1.6E-7,112-187;7.4E-9,269-356)<br>FE2OG_OXY(SS51471,9.635,106-190)                                                                                                                                                                      |

| ID | Position |        | Length |     | BlastP hit in GenBank nr and/or viruses data set          |                                                      |              |             |          | NCBI conserved domain (ID, E-value, alignment length in aa, alignment start - end position) | Interproscan matches (ID, E-value, alignment start - end position) |                                                                               |
|----|----------|--------|--------|-----|-----------------------------------------------------------|------------------------------------------------------|--------------|-------------|----------|---------------------------------------------------------------------------------------------|--------------------------------------------------------------------|-------------------------------------------------------------------------------|
|    | start    | end    | nt     | aa  | ORF, protein encoded, or mass                             | Species                                              | Accession    | Aa identity | E Value  |                                                                                             |                                                                    | Alignment length in aa (Start-end position)                                   |
|    |          |        |        |     | subunit alpha                                             | Solibacter usitatus<br>Ellin6076                     |              |             |          |                                                                                             |                                                                    | Prolyl 4-hydroxylase alpha subunit<br>homologue(SM00702,1.1E-4,10-189)        |
| 7  | 4,421    | 5,332  | 912    | 303 |                                                           |                                                      |              |             |          |                                                                                             |                                                                    |                                                                               |
|    |          |        |        |     | hypothetical protein<br>OsV5_030f                         | Ostreococcus virus                                   | YP_001648107 | 60.00%      | 1.11E-06 | 35(5-39)                                                                                    | PhoH<br>superfamily(pfam02562,8.51e-<br>13,37,1-37)                | PhoH(PF02562,3.3E-9,2-39)                                                     |
| 8  | 5,314    | 5,481  | 168    | 55  | phosphate starvation-<br>inducible protein<br>ATPase PhoH | Candidatus<br>Chloracidobacteriu<br>m thermophilum B | YP_004861930 | 64.90%      | 3.89E-06 | 37(1-37)                                                                                    |                                                                    | P-loop containing nucleoside triphosphate<br>hydrolases(SSF52540,4.2E-6,2-40) |
| 9  | 5,514    | 7,604  | 2,091  | 696 |                                                           |                                                      |              |             |          |                                                                                             |                                                                    |                                                                               |
|    |          |        |        |     | vesicular-fusion<br>protein nsf, putative                 | Ricinus communis                                     | XP_002519069 | 33.00%      | 8.43E-15 | 142(15-156)                                                                                 | CDC48_2 (smart01072,7.81e-<br>05,49,112-160)                       | ADC-like(SSF50692,6.9E-13,1-78)                                               |
| 10 | 7,637    | 8,140  | 504    | 167 |                                                           |                                                      |              |             |          |                                                                                             |                                                                    | VESICULAR-FUSION PROTEIN<br>NSF(PTHR23078,4.9E-11,1-146)                      |
|    |          |        |        |     | hypothetical protein<br>BpV1_108c                         | Bathycoccus sp.<br>RCC1105 virus                     | YP_004061538 | 37.00%      | 1.70E-91 | 434(2-435)                                                                                  |                                                                    | ARIADNE RING ZINC<br>FINGER(PTHR11685,4.4E-7,224-264)                         |
| 11 | 8,205    | 9,545  | 1,341  | 446 |                                                           |                                                      |              |             |          |                                                                                             |                                                                    |                                                                               |
|    |          |        |        |     | hypothetical protein                                      | Trichomonas<br>vaginalis G3                          | XP_001301335 | 32.90%      | 1.16E-12 | 131(156-286)                                                                                |                                                                    | RING/U-box(SSF57850,7.0E-9,228-285)                                           |
| 12 | 9,665    | 10,267 | 603    | 200 |                                                           |                                                      |              |             |          |                                                                                             |                                                                    |                                                                               |
|    |          |        |        |     | hypothetical protein<br>BpV2_179                          | Bathycoccus sp.<br>RCC1105 virus                     | ADQ91346     | 41.30%      | 1.86E-16 | 109(37-145)                                                                                 |                                                                    | signal-peptide(SignalP-NN(euk),-1.0,1-57)                                     |
| 13 | 10,248   | 10,703 | 456    | 151 |                                                           |                                                      |              |             |          |                                                                                             |                                                                    | transmembrane_regions(tmhmm,-1.0,35-<br>53;<br>-1.0,59-77;-1.0,119-137)       |
| 14 | 10,744   | 11,250 | 507    | 168 |                                                           |                                                      |              |             |          |                                                                                             |                                                                    | transmembrane_regions(tmhmm,-1.0,66-<br>88)                                   |

| ID | Position |        | Length |     | BlastP hit in GenBank nr and/or viruses data set    |                                    |              |             |          | NCBI conserved domain (ID, E-value, alignment length in aa, alignment start - end position) | Interproscan matches (ID, E-value, alignment start - end position) |                                                                                      |
|----|----------|--------|--------|-----|-----------------------------------------------------|------------------------------------|--------------|-------------|----------|---------------------------------------------------------------------------------------------|--------------------------------------------------------------------|--------------------------------------------------------------------------------------|
|    | start    | end    | nt     | aa  | ORF, protein encoded, or mass                       | Species                            | Accession    | Aa identity | E Value  |                                                                                             |                                                                    | Alignment length in aa (Start-end position)                                          |
| 15 | 11,197   | 11,604 | 408    | 135 |                                                     |                                    |              |             |          |                                                                                             |                                                                    | signal-peptide(SignalP-NN(euk),-1.0,1-35)<br>transmembrane_regions(tmhmm,-1.0,15-35) |
|    |          |        |        |     | putative prolyl 4-hydroxylase                       | Acanthamoeba polyphaga mimivirus   | YP_003987108 | 43.00%      | 1.73E-52 | 195(28-222)                                                                                 | P4Hc(smart00702,1.51e-28,172,47-218)                               | FE2OG_OXY(PS51471,10.599,108-219)                                                    |
| 16 | 11,612   | 12,286 | 675    | 224 | oxidoreductase, 2OG-Fe(II) oxygenase family protein | Acidithiobacillus sp. GGI-221      | ZP_11561250  | 39.50%      | 6.00E-33 | 180(44-223)                                                                                 | 2OG-FeII_Oxy_3(cl17304,1.51e-28,172,47-218)                        | Prolyl 4-hydroxylase alpha subunit homologue(SM00702,5.4E-31,38-218)                 |
|    |          |        |        |     |                                                     |                                    |              |             |          |                                                                                             |                                                                    | PROLYL 4-HYDROXYLASE ALPHA SUBUNIT(PTHR10869,1.9E-37,36-222)                         |
|    |          |        |        |     |                                                     |                                    |              |             |          |                                                                                             |                                                                    | signal-peptide(SignalP-NN(euk),-1.0,1-26)<br>transmembrane_regions(tmhmm,-1.0,4-22)  |
| 17 | 12,286   | 13,689 | 1,404  | 467 |                                                     |                                    |              |             |          |                                                                                             |                                                                    |                                                                                      |
| 18 | 13,732   | 14,082 | 351    | 116 | hypothetical protein BpV2_001c                      | Bathycoccus sp. RCC1105 virus BpV2 | ADQ91168     | 46.90%      | 1.28E-27 | 111(1-111)                                                                                  | rL-1(PHA02604,4.27e-19,111,5-115)                                  |                                                                                      |
|    |          |        |        |     | glycosyl transferase group 1                        | Fischerella sp. JSC-11             | ZP_08986113  | 28.80%      | 3.94E-13 | 197(5-201)                                                                                  | Methyltransf_24(pfam13578, 2.42e-21,119,47-165)                    | Methyltransf_24(PF13578,6.8E-17,47-165)                                              |
| 19 | 14,103   | 14,738 | 636    | 211 |                                                     | Actinoplanes phage phiAsp2         | YP_024820    | 26.70%      | 3.86E-05 | 148(17-164)                                                                                 |                                                                    | S-adenosyl-L-methionine-dependent methyltransferases(SSF53335,2.2E-8,45-165)         |
|    |          |        |        |     | NAD dependent epimerase/dehydratase family protein  | Trichomonas vaginalis G3           | XP_001297395 | 47.50%      | 6.21E-99 | 312(3-314)                                                                                  | NADB_Rossmann Superfamily(cl09931,2.26e-151,307,1-307)             | Epimerase(PF01370,5.6E-64,3-240)                                                     |
| 20 | 14,679   | 15,629 | 951    | 316 | GDP-L-fucose synthase 2                             | Acanthocystis turfacea Chlorella   | AGE59831     | 46.60%      | 1.75E-95 | 305(3-307)                                                                                  | RfbB(COG1088,3.33e-131,311,1-311)                                  | DTDP-GLUCOSE 4,6-DEHYDRATASE(PTHR10366:SF41,3.8E                                     |

| ID | Position |        | Length |     | BlastP hit in GenBank nr and/or viruses data set         |                                               |              |             |           | NCBI conserved domain (ID, E-value, alignment length in aa, alignment start - end position) | Interproscan matches (ID, E-value, alignment start - end position) |                                                                                                       |
|----|----------|--------|--------|-----|----------------------------------------------------------|-----------------------------------------------|--------------|-------------|-----------|---------------------------------------------------------------------------------------------|--------------------------------------------------------------------|-------------------------------------------------------------------------------------------------------|
|    | start    | end    | nt     | aa  | ORF, protein encoded, or mass                            | Species                                       | Accession    | Aa identity | E Value   |                                                                                             |                                                                    | Alignment length in aa (Start-end position)                                                           |
|    |          |        |        |     |                                                          | virus TN603.4.2                               |              |             |           |                                                                                             |                                                                    | -141,1-316)                                                                                           |
|    |          |        |        |     | thiamine pyrophosphate enzyme TPP binding domain protein | Clostridium botulinum B str. Eklund 17B       | YP_001886523 | 37.80%      | 1.84E-123 | 554(1-554)                                                                                  | TPP_PYR_POX_like(cd07035,2.79e-45,156,5-160)                       | TPP_enzyme_C(PF02775,1.7E-30,391-504)                                                                 |
| 21 | 15,690   | 17,357 | 1,668  | 555 |                                                          |                                               |              |             |           |                                                                                             | TPP_enzyme_M(pfam00205,2.96e-36,136,193-328)                       | TPP_enzyme_M(PF00205,1.3E-29,193-328)                                                                 |
|    |          |        |        |     |                                                          |                                               |              |             |           |                                                                                             | TPP_enzymes(cd00568,3.96e-44,138,367-504)                          | TPP_enzyme_N(PF02776,8.9E-47,1-174)                                                                   |
|    |          |        |        |     |                                                          |                                               |              |             |           |                                                                                             | IlvB(COG0028,4.80e-137,533,1-533)                                  | THIAMINE PYROPHOSPHATE ENZYMES(PTHR18968,2.8E-117,1-505)                                              |
|    |          |        |        |     | hypothetical protein ALOHA_HF4000007                     | uncultured marine microorganism HF4000_007I05 | ABZ06236     | 35.70%      | 2.40E-29  | 187(4-190)                                                                                  | CDO_I(pfam05995,5.83e-03,88,12-99)                                 | CDO_I(PF05995,1.9E-5,14-106)                                                                          |
| 22 | 17,381   | 18,031 | 651    | 216 | I05ctg1g9                                                |                                               |              |             |           |                                                                                             |                                                                    | RmlC-like cupins(SSF51182,8.9E-14,8-130)                                                              |
|    |          |        |        |     | putative DJ-1/PfpI family protein                        | uncultured marine microorganism HF4000_007I05 | ABZ06235     | 48.00%      | 6.63E-46  | 170(3-172)                                                                                  | GAT_1 Superfamily(cl00020,4.96e-52,173,2-174)                      | PEPTIDASE_C56_PFP1(PS51276,46.123,1-176)                                                              |
| 23 | 17,983   | 18,552 | 570    | 189 |                                                          |                                               |              |             |           |                                                                                             | PfpI(TIGR01382,2.02e-37,172,2-173)                                 | Class I glutamine amidotransferase-like(SSF52317,3.2E-39,1-175)                                       |
|    |          |        |        |     | hypothetical protein OtV6_039                            | Ostreococcus tauri virus RT-2011              | AFC34947     | 74.80%      | 0         | 377(20-396)                                                                                 | AAT_I Superfamily(cl00321,4.17e-79,353,35-387)                     | Predicted pyridoxal dependent aminotransferase, DegT/DnrJ/EryC1/StrS types(PIRSF000390,6.2E-71,1-394) |
| 24 | 18,564   | 19,763 | 1200   | 399 | predicted partial protein,                               | Phaeodactylum tricorutum CCAP                 | XP_002180908 | 54.70%      | 2.97E-126 | 355(35-389)                                                                                 | PRK15407(PRK15407,6.32e-94,364,31-394)                             | PLP-dependent transferases(SSF53383,1.6E-76,20-393)                                                   |

| ID | Position |        | Length |     | BlastP hit in GenBank nr and/or viruses data set |                                          |              |             |          | NCBI conserved domain (ID, E-value, alignment length in aa, alignment start - end position) | Interproscan matches (ID, E-value, alignment start - end position) |                                                                 |
|----|----------|--------|--------|-----|--------------------------------------------------|------------------------------------------|--------------|-------------|----------|---------------------------------------------------------------------------------------------|--------------------------------------------------------------------|-----------------------------------------------------------------|
|    | start    | end    | nt     | aa  | ORF, protein encoded, or mass                    | Species                                  | Accession    | Aa identity | E Value  |                                                                                             |                                                                    | Alignment length in aa (Start-end position)                     |
|    |          |        |        |     |                                                  | 1055/1                                   |              |             |          |                                                                                             |                                                                    |                                                                 |
|    |          |        |        |     |                                                  |                                          |              |             |          |                                                                                             | NADB_Rossmann                                                      | ASPARTATE DECARBOXYLASE<br>ASDA(PTHR11751:SF119,1.0E-35,33-362) |
| 25 | 19,645   | 20,436 | 792    | 263 | hypothetical protein<br>OtV6_036c                | Ostreococcus tauri<br>virus RT-2011      | AFC34944     | 41.20%      | 2.31E-39 | 208(2-209)                                                                                  | Superfamily(cl09931,4.65e-09,93,7-99)                              | Epimerase(PF01370,9.5E-10,25-177)                               |
|    |          |        |        |     | hypothetical protein<br>ACD_20C00109G0012        | uncultured bacterium                     | EKE04057     | 31.50%      | 4.67E-22 | 219(1-219)                                                                                  |                                                                    | NAD(P)-binding Rossmann-fold domains(SSF51735,8.8E-14,1-202)    |
| 26 | 20,461   | 21,159 | 699    | 232 | hypothetical protein<br>MpV1_031c                | Micromonas sp.<br>RCC1109 virus<br>MpV1  | YP_004061914 | 34.50%      | 5.83E-39 | 229(3-231)                                                                                  | Glyco_transf_34<br>Superfamily(cl05288,5.69e-11,185,23-207)        | Glyco_transf_34(PF05637,1.6E-6,22-93;2.5E-7,100-207)            |
|    |          |        |        |     | hypothetical protein<br>COCSUDRAFT_54970         | Coccomyxa subellipsoidea C-169           | EIE18426     | 25.00%      | 2.47E-10 | 229(4-232)                                                                                  |                                                                    |                                                                 |
| 27 | 21,166   | 21,936 | 771    | 256 | putative N-acetylglucosaminyltransferase         | Flavobacteria bacterium BAL38            | ZP_01733049  | 34.60%      | 1.82E-31 | 228(1-228)                                                                                  | Glyco_transf_17(pfam04724,1.03e-20,198,3-200)                      |                                                                 |
|    |          |        |        |     | hypothetical protein<br>NY2A_B618R               | Paramecium bursaria Chlorella virus NY2A | YP_001497814 | 31.00%      | 1.75E-23 | 199(2-200)                                                                                  |                                                                    | Glyco_transf_17(PF04724,1.0E-33,3-229)                          |
| 28 | 21,821   | 22,168 | 348    | 115 | hypothetical protein<br>OLOG_00294               | Ostreococcus lucimarinus virus OIV4      | AET84745     | 44.30%      | 1.20E-06 | 70(7-76)                                                                                    |                                                                    |                                                                 |
| 29 | 22,191   | 22,517 | 327    | 108 | quaternary ammonium compound-resistance protein  | Natrinema gari JCM 14663                 | ZP_21532505  | 29.80%      | 3.54E-02 | 101(2-102)                                                                                  |                                                                    | signal-peptide(SignalP-NN(euk),-1.0,1-52)                       |

| ID | Position |        | Length |     | BlastP hit in GenBank nr and/or viruses data set |                                     |              |             |           |                                             | NCBI conserved domain (ID, E-value, alignment length in aa, alignment start - end position) | Interproscan matches (ID, E-value, alignment start - end position)      |
|----|----------|--------|--------|-----|--------------------------------------------------|-------------------------------------|--------------|-------------|-----------|---------------------------------------------|---------------------------------------------------------------------------------------------|-------------------------------------------------------------------------|
|    | start    | end    | nt     | aa  | ORF, protein encoded, or mass                    | Species                             | Accession    | Aa identity | E Value   | Alignment length in aa (Start-end position) |                                                                                             |                                                                         |
|    |          |        |        |     |                                                  |                                     |              |             |           |                                             |                                                                                             | transmembrane_regions(tmhmm,-1.0,30-48;-1.0,58-78;-1.0,84-104)          |
| 30 | 22,670   | 23,491 | 822    | 273 | hypothetical protein H665_p044                   | Ostreococcus tauri virus 1          | YP_003212868 | 29.60%      | 7.83E-23  | 256(4-259)                                  |                                                                                             |                                                                         |
| 31 | 23,497   | 24,312 | 816    | 271 | hypothetical protein OMVG_00221                  | Ostreococcus lucimarinus            | AFK66216     | 28.60%      | 1.92E-23  | 256(3-258)                                  |                                                                                             |                                                                         |
| 32 | 24,285   | 25,376 | 1,092  | 363 | GDP-mannose 4,6-dehydratase                      | Sporosarcina newyorkensis 2681      | ZP_08678009  | 56.20%      | 3.63E-135 | 339(22-360)                                 | GDP_MD_SDR_e(cd05260,3.60e-153,336,25-360)                                                  | signal-peptide(SignalP-NN(euk),-1.0,1-32)                               |
|    |          |        |        |     |                                                  |                                     |              |             |           |                                             | Gmd(COG1089,4.42e-173,338,22-359)                                                           | gmd: GDP-mannose 4,6-dehydratase(TIGR01472,1.3E-136,23-360)             |
| 33 | 25,376   | 26,332 | 957    | 318 | hypothetical protein MpV1_229c                   | Micromonas sp. RCC1109 virus MpV1   | YP_004062112 | 45.30%      | 1.05E-83  | 299(3-301)                                  | GT1_YqgM_like(cd03801,1.28e-12,161,90-250)                                                  | signal-peptide(SignalP-NN(euk),-1.0,1-22)                               |
|    |          |        |        |     | glycosyl transferase, group 1                    | Jannaschia sp. CCS1                 | YP_512219    | 26.60%      | 9.84E-14  | 217(70-286)                                 | RfaG(COG0438,1.72e-11,146,99-244)                                                           | UDP-Glycosyltransferase/glycogen phosphorylase(SSF53756,2.2E-16,13-244) |
| 34 | 26,599   | 26,847 | 249    | 82  | hypothetical protein OLOG_00122                  | Ostreococcus lucimarinus virus OIV4 | AET84583     | 42.60%      | 2.33E-06  | 68(2-69)                                    |                                                                                             | signal-peptide(SignalP-NN(euk),-1.0,1-27)                               |
|    |          |        |        |     |                                                  |                                     |              |             |           |                                             |                                                                                             | transmembrane_regions(tmhmm,-1.0,5-23;-1.0,47-67)                       |
| 35 | 26,863   | 27,306 | 444    | 147 | hypothetical protein MPWG_00022                  | Micromonas pusilla virus PL1        | AET43512     | 30.00%      | 3.96E-07  | 95(50-144)                                  |                                                                                             |                                                                         |
| 36 | 27,370   | 27,642 | 273    | 90  | ubiquitin                                        | Gracilaria lemaneiformis            | AAY41882     | 92.10%      | 2.84E-44  | 76(13-88)                                   | Ubiquitin(cd01803,1.57e-44,76,13-88)                                                        | signal-peptide(SignalP-NN(euk),-1.0,1-22)                               |
|    |          |        |        |     |                                                  |                                     |              |             |           |                                             |                                                                                             | UBIQUITIN_2(PS50053,30.256,13-88)                                       |
| 37 | 27,666   | 28,205 | 540    | 179 | predicted protein                                | Leptosphaeria maculans JN3          | XP_003839359 | 81.30%      | 1.47E-04  | 32(143-174)                                 |                                                                                             |                                                                         |
| 38 | 28,223   | 28,717 | 495    | 164 | putative membrane protein                        | Emiliania huxleyi virus 99B1        | CAZ69772     | 29.70%      | 1.10E-07  | 157(7-163)                                  | DUF3592(pfam12158,1.21e-03,116,21-136)                                                      | signal-peptide(SignalP-NN(euk),-1.0,1-34)                               |



| ID | Position |        | Length |     | BlastP hit in GenBank nr and/or viruses data set |                                         |                |             |          | NCBI conserved domain (ID, E-value, alignment length in aa, alignment start - end position) | Interproscan matches (ID, E-value, alignment start - end position) |                                                                               |
|----|----------|--------|--------|-----|--------------------------------------------------|-----------------------------------------|----------------|-------------|----------|---------------------------------------------------------------------------------------------|--------------------------------------------------------------------|-------------------------------------------------------------------------------|
|    | start    | end    | nt     | aa  | ORF, protein encoded, or mass                    | Species                                 | Accession      | Aa identity | E Value  |                                                                                             |                                                                    | Alignment length in aa (Start-end position)                                   |
|    |          |        |        |     |                                                  |                                         |                |             |          |                                                                                             |                                                                    | transmembrane_regions(tmhmm,-1.0,19-39;-1.0,117-137)                          |
|    |          |        |        |     | probable FAD-linked sulfhydryl oxidase           | Acanthamoeba polyphaga                  | YP_003986873   | 37.80%      | 1.41E-13 | 97(1-97)                                                                                    | Evr1_Alr(pfam04777,3.65e-19,91,8-98)                               | FAD-dependent thiol oxidase(SSF69000,2.4E-21,1-110)                           |
| 39 | 28,736   | 29,149 | 414    | 137 | sulfhydryl oxidase                               | Chlamydomonas reinhardtii               | XP_001703298   | 38.50%      | 1.83E-13 | 96(7-102)                                                                                   |                                                                    | ALR/ERV(PTHR12645,2.0E-14,26-129)                                             |
|    |          |        |        |     |                                                  |                                         |                |             |          |                                                                                             |                                                                    | signal-peptide(SignalP-NN(euk),-1.0,1-25)                                     |
|    |          |        |        |     | hypothetical protein EhV003                      | Emiliana huxleyi virus 86               | YP_293757      | 36.60%      | 2.31E-13 | 100(14-113)                                                                                 |                                                                    | transmembrane_regions(tmhmm,-1.0,115-135)                                     |
| 40 | 29,155   | 29,529 | 375    | 124 |                                                  |                                         |                |             |          |                                                                                             |                                                                    | signal-peptide(SignalP-NN(euk),-1.0,1-51)                                     |
|    |          |        |        |     |                                                  |                                         |                |             |          |                                                                                             |                                                                    | transmembrane_regions(tmhmm,-1.0,14-32;-1.0,37-57;-1.0,103-118)               |
| 41 | 29,534   | 30,025 | 492    | 163 | hypothetical protein MpV1_224c                   | Micromonas sp. RCC1109 virus MpV1       | YP_004062107.1 | 52.00%      | 0        | 1046(4-1049)                                                                                | HATPase_c(pfam02518,1.95e-05,106,45-150)                           | Ribosomal protein S5 domain 2-like(SSF54211,6.3E-24,218-368)                  |
|    |          |        |        |     | DNA topoisomerase II                             | Encephalitozoon intestinalis ATCC 50506 | XP_003072680   | 44.20%      | 0        | 1044(3-1046)                                                                                | TopoIIA_Trans_ScTopoIIA(cd03481,1.04e-30,110,251-360)              | Arginine repressor C-terminal-like domain(G3DSA:3.30.1360.40,3.9E-10,819-888) |
| 42 |          |        |        |     |                                                  |                                         |                |             |          |                                                                                             | TOPRIM_TopoIIA(cd03365,1.16e-62,118,401-518)                       | DNA TOPOISOMERASE/GYRASE(PTHR10169,0,0,2-1049)                                |
|    |          |        |        |     |                                                  |                                         |                |             |          |                                                                                             | TOP4c(cd00187,8.20e-102,413,637-1049)                              |                                                                               |
|    |          |        |        |     |                                                  |                                         |                |             |          |                                                                                             | PLN03128(PLN03128,0,1048,2-1049)                                   |                                                                               |



| ID | Position |        | Length |     | BlastP hit in GenBank nr and/or viruses data set |                                           |              |             |           | NCBI conserved domain (ID, E-value, alignment length in aa, alignment start - end position) | Interproscan matches (ID, E-value, alignment start - end position)                 |                                                                                                                                                                                                    |
|----|----------|--------|--------|-----|--------------------------------------------------|-------------------------------------------|--------------|-------------|-----------|---------------------------------------------------------------------------------------------|------------------------------------------------------------------------------------|----------------------------------------------------------------------------------------------------------------------------------------------------------------------------------------------------|
|    | start    | end    | nt     | aa  | ORF, protein encoded, or mass                    | Species                                   | Accession    | Aa identity | E Value   |                                                                                             |                                                                                    | Alignment length in aa (Start-end position)                                                                                                                                                        |
| 50 | 40,240   | 40,923 | 684    | 227 | hypothetical protein ACD_34C00433G002            | uncultured bacterium                      | EKD88618     | 24.50%      | 4.50E-04  | 198(18-215)                                                                                 | Pyr-5-nucltdase(TIGR01993,4.84e-10,178,18-195)                                     | HAD-like(SSF56784,7.8E-8,18-208)                                                                                                                                                                   |
| 51 | 41,086   | 42,186 | 1,101  | 366 | ornithine decarboxylase 1                        | Chlamydomonas reinhardtii                 | XP_001697502 | 45.80%      | 2.39E-102 | 356(11-366)                                                                                 | PLPDE_III_ODC(cd00622,1.91e-144,350,17-366)                                        | Alanine racemase C-terminal domain-like(SSF50621,1.5E-23,232-357)<br>ARGININE/DIAMINOPIMELATE/ORNITHINE<br>DECARBOXYLASE(PTHR11482,3.6E-127,17-357)<br>PLP-binding barrel(SSF51419,1.8E-58,17-259) |
| 52 | 42,503   | 43,207 | 705    | 234 | von Willebrand factor A                          | Intrasporangium calvum DSM 43043          | YP_004097376 | 45.70%      | 1.52E-40  | 162(54-215)                                                                                 | vWFA(cd00198,2.17e-06,106,51-156)                                                  | signal-peptide(SignalP-NN(euk),-1.0,1-22)<br>vWA-like(SSF53300,5.8E-13,48-221)                                                                                                                     |
| 53 | 43,155   | 43,667 | 513    | 170 | putative deoxynucleoside monophosphate kinase    | Cafeteria roenbergensis                   | YP_003969712 | 29.50%      | 1.64E-14  | 162(1-162)                                                                                  | deoxynucleoside monophosphate kinase(PHA02575,8.79e-06,74,1-74;1.50e-03,63,98-160) | P-loop containing nucleoside triphosphate hydrolases(SSF52540,2.7E-6,1-160)                                                                                                                        |
| 54 | 43,668   | 44,078 | 411    | 136 | deoxynucleotide monophosphate kinase, putative   | Marinobacter algicola DG893               | ZP_01894233  | 32.40%      | 6.19E-14  | 152(2-153)                                                                                  |                                                                                    | signal-peptide(SignalP-NN(euk),-1.0,1-26)<br>transmembrane_regions(tmhmm,-1.0,4-26;-1.0,41-63)                                                                                                     |
| 55 | 44,078   | 44,389 | 312    | 103 | hypothetical protein PBCVMA1D_454L               | Paramecium bursaria Chlorella virus MA-1D | AGE54931     | 64.30%      | 6.30E-24  | 70(24-93)                                                                                   |                                                                                    |                                                                                                                                                                                                    |
|    |          |        |        |     | Tlr 6Fp protein                                  | Tetrahymena                               | AAL73477     | 42.90%      | 2.44E-12  | 70(24-93)                                                                                   |                                                                                    |                                                                                                                                                                                                    |

| ID | Position |        | Length |     | BlastP hit in GenBank nr and/or viruses data set |                                               |              |             |           | NCBI conserved domain (ID, E-value, alignment length in aa, alignment start - end position) | Interproscan matches (ID, E-value, alignment start - end position) |                                                                                      |
|----|----------|--------|--------|-----|--------------------------------------------------|-----------------------------------------------|--------------|-------------|-----------|---------------------------------------------------------------------------------------------|--------------------------------------------------------------------|--------------------------------------------------------------------------------------|
|    | start    | end    | nt     | aa  | ORF, protein encoded, or mass                    | Species                                       | Accession    | Aa identity | E Value   |                                                                                             |                                                                    | Alignment length in aa (Start-end position)                                          |
| 56 | 44,449   | 45,627 | 1,179  | 392 | hypothetical protein OIV1_184c                   | thermophila<br>Ostreococcus lucimarinus virus | YP_004061816 | 31.40%      | 9.88E-38  | 335(56-390)                                                                                 | RFC1(pfam08519,6.06e-05,124,253-376)                               | DNA polymerase III clamp loader subunits, C-terminal domain(SSF48019,5.7E-7,233-288) |
|    |          |        |        |     | hypothetical protein                             | Paramecium tetraurelia strain d4-2            | XP_001427741 | 32.90%      | 6.56E-02  | 66(230-295)                                                                                 |                                                                    |                                                                                      |
|    |          |        |        |     | hypothetical protein BpV1_171c                   | Bathycoccus sp.<br>RCC1105 virus              | YP_004061601 | 47.30%      | 2.06E-52  | 184(9-192)                                                                                  | S14_ClpP_2(cd07017,1.56e-15,134,59-192)                            | ATP-DEPENDENT CLP PROTEASE PROTEOLYTIC SUBUNIT(PTHR10381,7.1E-16,52-193)             |
| 57 | 45,579   | 46,163 | 585    | 194 | ATP-dependent Clp protease proteolytic subunit   | Clostridium sp. DL-VIII                       | ZP_09206655  | 33.10%      | 7.13E-14  | 166(28-193)                                                                                 |                                                                    | CLP_protease(PF00574,2.4E-24,60-193)                                                 |
|    |          |        |        |     | hypothetical protein OtV6_158                    | Ostreococcus tauri virus RT-2011              | AFC35066     | 44.10%      | 3.76E-72  | 317(3-319)                                                                                  | TFIIB(pfam00382,2.73e-03,55,148-202)                               |                                                                                      |
| 58 | 46,492   | 47,478 | 987    | 328 | transcription initiation factor IIB              | Rhizoctonia solani AG-1 IA                    | ELU45667     | 27.10%      | 2.68E-20  | 273(54-326)                                                                                 | SUA7(COG1405,1.44e-25,260,54-313)                                  | TRANSCRIPTION INITIATION FACTOR IIB(PTHR11618:SF13,2.8E-32,54-314)                   |
| 59 | 47,475   | 48,227 | 753    | 250 | hypothetical protein MpV1_158                    | Micromonas sp.<br>RCC1109 virus               | YP_004062041 | 65.80%      | 4.11E-118 | 240(7-246)                                                                                  | Glycos_transf_2(pfam00535,5.88e-04,114,55-168)                     | signal-peptide(SignalP-NN(euk),-1.0,1-17)                                            |
|    |          |        |        |     | hypothetical protein Vapar_0507                  | Variovorax paradoxus S110                     | YP_002942436 | 37.00%      | 1.00E-47  |                                                                                             |                                                                    | Nucleotide-diphospho-sugar transferases(SSF53448,7.5E-10,5-236)                      |
| 60 | 48,235   | 48,870 | 636    | 211 | hypothetical protein MpV1_159                    | Micromonas sp.<br>RCC1109 virus               | YP_004062042 | 41.50%      | 7.88E-46  | 202(9-210)                                                                                  | GerC3_HepT(TIGR02748,7.16e-03,82,107-188)                          |                                                                                      |
| 61 | 48,900   | 49,751 | 852    | 283 | hypothetical protein H665_p156                   | Ostreococcus tauri virus 1                    | YP_003212979 | 39.70%      | 7.98E-58  | 280(2-281)                                                                                  | Adenylation_mRNA_capping(cd07895,4.31e-39,180,15-194)              | mRNA_cap_C(PF03919,8.0E-8,232-280)                                                   |
|    |          |        |        |     |                                                  |                                               |              |             |           | mRNA_cap_C(pfam03919,1.80e-05,83,199-281)                                                   | Nucleic acid-binding proteins(SSF50249,2.1E-15,196-283)            |                                                                                      |

| ID | Position |        | Length |     | BlastP hit in GenBank nr and/or viruses data set                           |                                   |              |             |          | NCBI conserved domain (ID, E-value, alignment length in aa, alignment start - end position) | Interproscan matches (ID, E-value, alignment start - end position) |                                                                                                                          |
|----|----------|--------|--------|-----|----------------------------------------------------------------------------|-----------------------------------|--------------|-------------|----------|---------------------------------------------------------------------------------------------|--------------------------------------------------------------------|--------------------------------------------------------------------------------------------------------------------------|
|    | start    | end    | nt     | aa  | ORF, protein encoded, or mass                                              | Species                           | Accession    | Aa identity | E Value  |                                                                                             |                                                                    | Alignment length in aa (Start-end position)                                                                              |
| 62 | 49,758   | 49,997 | 240    | 79  | hypothetical protein OtV6_162c                                             | Ostreococcus tauri virus RT-2011  | AFC35070     | 38.50%      | 7.54E-57 | 256(1-256)                                                                                  | Peptidase_C19A(cd02657,1.28e-20,243,3-245)                         | DNA ligase/mRNA capping enzyme, catalytic domain(SSF56091,4.1E-28,1-195)<br>UCH_2_3(PS50235,17.556,2-259)                |
| 63 | 49,994   | 50,773 | 780    | 259 | PREDICTED:<br>ubiquitin carboxyl-terminal hydrolase 17-like protein 2-like | Cricetulus griseus                | XP_003512737 | 26.80%      | 3.45E-15 | 255(3-257)                                                                                  | UCH(pfam00443,1.16e-25,244,2-245)                                  | Cysteine proteinases(SSF54001,8.2E-42,1-258)                                                                             |
| 64 | 50,815   | 51,402 | 588    | 195 | hypothetical protein BpV2_156                                              | Bathycoccus sp.RCC1105 virus BpV2 | ADQ91323     | 42.60%      | 8.21E-44 | 185(11-195)                                                                                 |                                                                    | mRNA_triPase(PF02940,2.1E-14,33-169)                                                                                     |
| 65 | 51,406   | 54,216 | 2,811  | 936 | hypothetical protein MGL_2917                                              | Malassezia globosa CBS 7966       | XP_001729931 | 25.20%      | 1.06E-04 | 104(72-175)                                                                                 | CYTH-like_mRNA_RTPase(cd07470,2.20e-12,113,67-179)                 | CYTH-like phosphatases(SSF55154,1.0E-11,22-183)                                                                          |
| 66 | 53,958   | 55,889 | 1,932  | 643 | hypothetical protein OtV2_151                                              | Ostreococcus tauri virus 2        | YP_004063584 | 60.80%      | 0        | 476(168-643)                                                                                | COG3378(COG3378,7.44e-10,159,366-524)                              | SF3_HELICASE_1(PS51206,11.932,328-502)<br>P-loop containing nucleoside triphosphate hydrolases(SSF52540,1.0E-11,342-519) |
| 67 | 55,913   | 56,200 | 288    | 95  | hypothetical protein MPWG_00084                                            | Micromonas pusilla virus PL1      | AET43573     | 43.50%      | 2.86E-06 | 69(16-84)                                                                                   |                                                                    |                                                                                                                          |
|    |          |        |        |     | hypothetical protein OsV5_190f                                             | Ostreococcus virus OsV5           | YP_001648266 | 63.70%      | 0        | 451(1-451)                                                                                  | Capsid_NCLDV(pfam04451,9.22e-60,248,200-447)                       | Capsid_NCLDV(PF04451,1.8E-67,198-447)                                                                                    |
| 68 | 56,279   | 57,634 | 1,356  | 451 |                                                                            |                                   |              |             |          |                                                                                             |                                                                    | Adenovirus<br>PII,hexon,subdomain4(G3DSA:2.70.9.10,3.1E-52 35-220)                                                       |

| ID | Position |        | Length |     | BlastP hit in GenBank nr and/or viruses data set |                                     |              |             |          |                                             | NCBI conserved domain (ID, E-value, alignment length in aa, alignment start - end position) | Interproscan matches (ID, E-value, alignment start - end position) |    |       |         |                                                                                                                            |
|----|----------|--------|--------|-----|--------------------------------------------------|-------------------------------------|--------------|-------------|----------|---------------------------------------------|---------------------------------------------------------------------------------------------|--------------------------------------------------------------------|----|-------|---------|----------------------------------------------------------------------------------------------------------------------------|
|    | start    | end    | nt     | aa  | ORF, protein encoded, or mass                    | Species                             | Accession    | Aa identity | E Value  | Alignment length in aa (Start-end position) |                                                                                             | Group                                                              | II | dsDNA | viruses |                                                                                                                            |
| 69 | 57,730   | 58,044 | 315    | 104 | S-adenosylmethionine decarboxylase proenzyme     | Nitratiruptor sp. SB155-2           | YP_001356990 | 35.80%      | 8.34E-16 | 92(2-93)                                    | AdoMet_dc(pfam02675,1.02e-24,88,3-90)                                                       |                                                                    |    |       |         | VP(SSF49749,3.3E-55,25-219;7.9E-43,220-451)<br>African swine fever virus,p72,major capsid(G3DSA:2.70.9.20,1.8E-53 318-451) |
| 70 | 58,047   | 58,244 | 198    | 65  |                                                  |                                     |              |             |          |                                             |                                                                                             |                                                                    |    |       |         | signal-peptide(SignalP-NN(euk),-1.0,1-28)                                                                                  |
| 71 | 58,267   | 58,680 | 414    | 137 |                                                  |                                     |              |             |          |                                             |                                                                                             |                                                                    |    |       |         | transmembrane_regions(tmhmm,-1.0,12-30;-1.0,40-58)                                                                         |
| 72 | 58,877   | 59,479 | 603    | 200 |                                                  |                                     |              |             |          |                                             |                                                                                             |                                                                    |    |       |         | transmembrane_regions(tmhmm,-1.0,165-187)                                                                                  |
| 73 | 59,516   | 60,046 | 531    | 176 | CBLC protein                                     | Mus musculus                        | AAK01405     | 37.90%      | 5.57E-07 | 63(106-168)                                 | RING(cd00162,2.57e-09,41,126-166)<br>zf-C3HC4_2(pfam13923,5.22e-09,41,124-164)              |                                                                    |    |       |         | CBL(PTHR23007,5.2E-5,127-163)<br>RING/U-box(SSF57850,8.3E-12,82-169)                                                       |
| 74 | 60,335   | 60,694 | 360    | 119 | predicted protein                                | Physcomitrella patens subsp. patens | XP_001768243 | 48.10%      | 6.32E-20 | 81(3-83)                                    |                                                                                             |                                                                    |    |       |         | DUF814(PF05670,1.2E-18,7-85)<br>DUF814(pfam05670,2.99e-21,70,6-75)                                                         |
| 75 | 61,206   | 61,547 | 342    | 113 |                                                  |                                     |              |             |          |                                             |                                                                                             |                                                                    |    |       |         | SUBFAMILY NOT NAMED(PTHR13049:SF0,1.1E-5,4-54)<br>signal-peptide(SignalP-NN(euk),-1.0,1-29)                                |
| 76 | 61,594   | 62,025 | 432    | 143 |                                                  |                                     |              |             |          |                                             |                                                                                             |                                                                    |    |       |         | transmembrane_regions(tmhmm,-1.0,10-28;-1.0,48-66;-1.0,80-100)                                                             |

| ID | Position |        | Length |     | BlastP hit in GenBank nr and/or viruses data set             |                                          |              |             |           | NCBI conserved domain (ID, E-value, alignment length in aa, alignment start - end position) | Interproscan matches (ID, E-value, alignment start - end position) |                                                                                                                                                           |
|----|----------|--------|--------|-----|--------------------------------------------------------------|------------------------------------------|--------------|-------------|-----------|---------------------------------------------------------------------------------------------|--------------------------------------------------------------------|-----------------------------------------------------------------------------------------------------------------------------------------------------------|
|    | start    | end    | nt     | aa  | ORF, protein encoded, or mass                                | Species                                  | Accession    | Aa identity | E Value   |                                                                                             |                                                                    | Alignment length in aa (Start-end position)                                                                                                               |
| 77 | 62,015   | 62,692 | 678    | 225 | PREDICTED:<br>procollagen<br>galactosyltransferase<br>2-like | Xenopus (Silurana)<br>tropicalis         | XP_002933810 | 27.70%      | 2.30E-13  | 181(1-181)                                                                                  | Glyco_transf_25(cd06532,4.80e-19,149,5-153)                        | PROCOLLAGEN-LYSINE,2-OXOGLUTARATE 5-DIOXYGENASE/GLYCOSYLTRANSFERASE 25 FAMILY MEMBER(PTHR10730,2.5E-7,1-103)<br>transmembrane_regions(tmhmm,-1.0,193-215) |
| 78 | 62,693   | 63,043 | 351    | 116 | LPS<br>glycosyltransferase                                   | Burkholderia<br>cenocepacia BC7          | ZP_21158759  | 38.50%      | 1.78E-11  | 87(8-94)                                                                                    | Glyco_transf_25(cd06532,9.82e-22,88,5-92)                          | GLYCOSYLTRANSFERASE 25 FAMILY MEMBER(PTHR10730:SF2,4.1E-8,1-87)<br>Glyco_transf_25(PF01755,1.1E-17,5-103)                                                 |
| 79 | 63,067   | 63,384 | 318    | 105 |                                                              |                                          |              |             |           |                                                                                             | Glyco_transf_25(cd06532,4.45e-03,28,8-35)                          | signal-peptide(SignalP-NN(euk),-1.0,1-2)<br>transmembrane_regions(tmhmm,-1.0,42-62;-1.0,81-99)                                                            |
| 80 | 63,389   | 63,796 | 408    | 135 | hypothetical protein                                         | Theileria parva<br>strain Muguga         | XP_765348    | 32.90%      | 2.40E-04  | 81(50-130)                                                                                  | CRAL_TRIO(pfam00650,5.51e-03,73,63-135)                            | CRAL_TRIO(PF00650,3.4E-6,63-133)                                                                                                                          |
| 81 | 63,782   | 64,195 | 414    | 137 | hypothetical protein<br>MpV1_155c                            | Micromonas sp.<br>RCC1109 virus<br>MpV1  | YP_004062038 | 67.40%      | 8.41E-154 | 316(3-318)                                                                                  | RNRR2(cd01049,3.78e-109,275,13-287)                                | RIBONUCLEOSIDE-DIPHOSPHATE REDUCTASE SMALL CHAIN(PTHR23409,7.4E-191,1-318)                                                                                |
| 82 | 64,252   | 65,208 | 957    | 318 | predicted protein                                            | Ostreococcus<br>lucimarinus<br>CCE9901   | XP_001419276 | 60.80%      | 3.34E-145 | 318(1-318)                                                                                  |                                                                    | Ferritin-like(SSF47240,2.0E-113,1-303)<br>transmembrane_regions(tmhmm,-1.0,157-177)                                                                       |
| 83 | 65,205   | 65,495 | 291    | 96  | hypothetical protein<br>BpV1_143                             | Bathycoccus sp.<br>RCC1105 virus<br>BpV1 | YP_004061573 | 41.30%      | 6.36E-09  | 63(8-70)                                                                                    |                                                                    | signal-peptide(SignalP-NN(euk),-1.0,1-17)                                                                                                                 |

| ID | Position |        | Length |     | BlastP hit in GenBank nr and/or viruses data set |                                    |              |             |          |                                             | NCBI conserved domain (ID, E-value, alignment length in aa, alignment start - end position) | Interproscan matches (ID, E-value, alignment start - end position)  |
|----|----------|--------|--------|-----|--------------------------------------------------|------------------------------------|--------------|-------------|----------|---------------------------------------------|---------------------------------------------------------------------------------------------|---------------------------------------------------------------------|
|    | start    | end    | nt     | aa  | ORF, protein encoded, or mass                    | Species                            | Accession    | Aa identity | E Value  | Alignment length in aa (Start-end position) |                                                                                             |                                                                     |
| 84 | 65,513   | 66,496 | 984    | 327 |                                                  |                                    |              |             |          |                                             |                                                                                             | transmembrane_regions(tmhmm,-1.0,10-30;-1.0,44-64)                  |
| 85 | 66,571   | 67,266 | 696    | 231 | hypothetical protein MPVG_00083                  | Micromonas pusilla virus 12T       | YP_007676151 | 46.90%      | 6.45E-51 | 206(1-206)                                  |                                                                                             | DUF2738(PF10927,9.0E-7,34-230)                                      |
|    |          |        |        |     | EsV-1-76                                         | Ectocarpus siliculosus             | CBN80379     | 26.00%      | 4.00E-06 |                                             |                                                                                             |                                                                     |
| 86 | 67,311   | 69,416 | 2,106  | 701 | hypothetical protein MpV1_151c                   | Micromonas sp. RCC1109 virus MpV1  | YP_004062034 | 28.30%      | 2.19E-19 | 353(126-478)                                | PKc(cd00180,5.82e-17,199,139-337)                                                           | PROTEIN_KINASE_DOM(PS50011,15.722,130-503)                          |
|    |          |        |        |     | Serine/threonine-protein kinase ULK2             | Harpegnathos saltator              | EFN88339     | 30.90%      | 5.85E-06 | 177(139-315)                                |                                                                                             | Serine/Threonine protein kinases, catalytic(SM00220,8.1E-4,130-487) |
|    |          |        |        |     | hypothetical protein H665_p144                   | Ostreococcus tauri virus 1         | YP_003212967 | 37.60%      | 5.75E-09 | 84(14-97)                                   |                                                                                             | GLUTAREDOXIN_2(PS51354,9.516,27-97)                                 |
| 87 | 69,421   | 69,714 | 294    | 97  | glutaredoxin                                     | Methanosaeta thermophila PT        | YP_843336    | 32.40%      | 9.93E-05 | 62(35-96)                                   | NrdH(cd02976,1.72e-10,58,39-96)                                                             | Thioredoxin-like(SSF52833,7.2E-10,26-96)                            |
|    |          |        |        |     |                                                  |                                    |              |             |          |                                             |                                                                                             | signal-peptide(SignalP-NN(euk),-1.0,1-28)                           |
| 88 | 69,709   | 69,912 | 204    | 67  | hypothetical protein OtV6_145                    | Ostreococcus tauri virus RT-2011   | AFC35053     | 36.90%      | 2.75E-09 | 65(2-66)                                    |                                                                                             | transmembrane_regions(tmhmm,-1.0,10-30)                             |
|    |          |        |        |     |                                                  |                                    |              |             |          |                                             |                                                                                             | signal-peptide(SignalP-NN(euk),-1.0,1-31)                           |
| 89 | 69,919   | 70,758 | 840    | 279 | hypothetical protein BpV2_144c                   | Bathycoccus sp. RCC1105 virus BpV2 | ADQ91311     | 40.90%      | 2.48E-53 | 252(24-275)                                 |                                                                                             | transmembrane_regions(tmhmm,-1.0,15-35)                             |
|    |          |        |        |     | hypothetical protein VOLCADRAFT_119              | Volvox carteri f. nagariensis      | XP_002956623 | 28.90%      | 1.97E-14 | 251(27-277)                                 |                                                                                             |                                                                     |



| ID | Position |        | Length |     | BlastP hit in GenBank nr and/or viruses data set |                                                 |              |             |          | NCBI conserved domain (ID, E-value, alignment length in aa, alignment start - end position) | Interproscan matches (ID, E-value, alignment start - end position) |                                                                                               |
|----|----------|--------|--------|-----|--------------------------------------------------|-------------------------------------------------|--------------|-------------|----------|---------------------------------------------------------------------------------------------|--------------------------------------------------------------------|-----------------------------------------------------------------------------------------------|
|    | start    | end    | nt     | aa  | ORF, protein encoded, or mass                    | Species                                         | Accession    | Aa identity | E Value  |                                                                                             |                                                                    | Alignment length in aa (Start-end position)                                                   |
| 90 | 70,776   | 71,249 | 474    | 157 | hypothetical protein OtV6_143                    | Ostreococcus tauri virus RT-2011                | AFC35051     | 30.70%      | 9.53E-13 | 124(30-153)                                                                                 |                                                                    | zf-RING_2(PF13639,9.0E-12,31-77)                                                              |
|    |          |        |        |     | PREDICTED: RING finger protein 141-like          | Bombus impatiens                                | XP_003487428 | 41.20%      | 1.22E-07 | 50(29-78)                                                                                   | RING(cd00162,1.92e-08,48,31-78)                                    | RING FINGER PROTEIN 38(PTHR14155:SF2,2.9E-8,31-101)                                           |
| 91 | 71,271   | 71,609 | 339    | 112 | hypothetical protein TCSYLVIO_005045             | Trypanosoma cruzi                               | EKG03892     | 48.10%      | 3.35E-09 | 52(28-79)                                                                                   | RING(cd00162,3.80e-06,41,31-71)                                    | zf-RING_2(PF13639,4.6E-13,31-72)                                                              |
|    |          |        |        |     |                                                  |                                                 |              |             |          |                                                                                             | zf-C3HC4_2(pfam13923,2.37e-06,44,29-72)                            | RING FINGER PROTEIN 24-RELATED(PTHR22766,2.8E-11,31-84)<br>RING/U-box(SSF57850,9.3E-17,25-94) |
| 92 | 71,500   | 72,162 | 663    | 220 | kinase protein                                   | Acanthocystis turfacea<br>Chlorella virus NTS-1 | AGE57698     | 37.00%      | 9.20E-25 | 179(1-179)                                                                                  | dNK(cd01673,1.16e-30,166,3-168)                                    | Deoxynucleoside kinase(PIRSF000705,3.7E-14,1-197)                                             |
|    |          |        |        |     | Deoxynucleoside kinase                           | Lepeophtheirus salmonis                         | ADD38206     | 28.40%      | 4.40E-20 | 201(4-204)                                                                                  | Tmk(COG0125,4.27e-12,181,4-184)                                    | P-loop containing nucleoside triphosphate hydrolases(SSF52540,3.0E-33,1-184)                  |
| 93 | 72,189   | 72,824 | 636    | 211 | hypothetical protein CHLNCRAFT_133736            | Chlorella variabilis                            | EFN55609     | 31.40%      | 5.53E-07 | 151(59-209)                                                                                 | Glyco_transf_25(cd06532,2.74e-05,77,25-101)                        | Pox_P35(PF03213,5.3E-6,81-184)                                                                |
|    |          |        |        |     | hypothetical protein BpV1_162c                   | Bathycoccus sp. RCC1105 virus BpV1              | YP_004061592 | 29.60%      | 4.27E-03 | 95(68-162)                                                                                  | Glyco_transf_25 Superfamily(cl01298,4.04e-04,110,61-170)           | signal-peptide(SignalP-NN(euk),-1.0,1-21)                                                     |
| 94 | 72,833   | 73,555 | 723    | 240 |                                                  | Anopheles gambiae str. PEST                     | XP_309198    | 64.00%      | 9.26E-05 | 47(51-97)                                                                                   |                                                                    | signal-peptide(SignalP-NN(euk),-1.0,1-27)<br>transmembrane_regions(tmhmm,-1.0,10-30)          |
|    |          |        |        |     |                                                  |                                                 |              |             |          |                                                                                             |                                                                    |                                                                                               |
| 95 | 73,579   | 73,803 | 225    | 74  | hypothetical protein BpV2_142                    | Bathycoccus sp. RCC1105 virus BpV2              | ADQ91309     | 49.30%      | 1.17E-14 | 63(1-63)                                                                                    |                                                                    |                                                                                               |
| 96 | 73,809   | 74,597 | 789    | 262 | hypothetical protein MpV1_145                    | Micromonas sp. RCC1109 virus                    | YP_004062028 | 47.20%      | 1.83E-78 | 261(2-262)                                                                                  | TBP_TLF(cd00652,4.28e-06,71,141-211)                               | Beta2-adaptin/TBP,C-terminal domain(G3DSA:3.30.310.10,1.4E-8,137-                             |



| ID  | Position |        | Length |     | BlastP hit in GenBank nr and/or viruses data set    |                                      |              |             |           | NCBI conserved domain (ID, E-value, alignment length in aa, alignment start - end position) | Interproscan matches (ID, E-value, alignment start - end position) |                                                                           |
|-----|----------|--------|--------|-----|-----------------------------------------------------|--------------------------------------|--------------|-------------|-----------|---------------------------------------------------------------------------------------------|--------------------------------------------------------------------|---------------------------------------------------------------------------|
|     | start    | end    | nt     | aa  | ORF, protein encoded, or mass                       | Species                              | Accession    | Aa identity | E Value   |                                                                                             |                                                                    | Alignment length in aa (Start-end position)                               |
| 103 | 79,220   | 79,528 | 309    | 102 | hypothetical protein                                | Marine Group II euryarchaeote        | WP_018035887 | 47.00%      | 2.00E-23  | 93(2-94)                                                                                    | HNHc(cd00085,7.78e-07,51,20-70)                                    | HNH(PF01844,1.5E-8,40-72)                                                 |
| 104 | 79,534   | 79,911 | 378    | 125 | hypothetical protein crov535                        | Cafeteria roenbergensis virus BV-PW1 | YP_003970168 | 35.40%      | 1.76E-07  | 81(2-82)                                                                                    |                                                                    | HNH nucleases(SM00507,0.0027,16-69)                                       |
| 105 | 79,938   | 82,187 | 2,250  | 749 | ribonucleoside-diphosphate reductase, alpha subunit | Microscilla marina ATCC 23134        | ZP_01688231  | 59.00%      | 0         | 728(1-728)                                                                                  | ATP-cone(pfam03477,5.47e-14,86,1-86)                               | ATP_CONE(PS51161,16.237,1-89)                                             |
| 106 | 82,211   | 82,411 | 201    | 66  | ribonucleoside diphosphate reductase                | Ostreococcus lucimarinus virus OIV3  | AFK66128     | 61.60%      | 0         | 749(1-749)                                                                                  | RNR_I(cd01679,0,571,147-717)                                       | RIBONUCLEOSIDE-DIPHOSPHATE REDUCTASE LARGE CHAIN(PTHR11573:SF6,0,0,1-728) |
| 107 | 82,398   | 83,129 | 732    | 243 | hypothetical protein OtV6_177                       | Ostreococcus tauri virus RT-2011     | AFC35085     | 58.60%      | 2.81E-100 | 236(5-240)                                                                                  | PLN02437(PLN02437,0,749,1-749)                                     | PFL-like glycy radical enzymes(SSF51998,6.3E-186,195-728)                 |
| 108 | 83,178   | 83,513 | 336    | 111 |                                                     |                                      |              |             |           |                                                                                             |                                                                    | signal-peptide(SignalP-NN(euk),-1.0,1-23)                                 |
| 109 | 83,536   | 83,919 | 384    | 127 | hypothetical protein MPVG_00097                     | Micromonas pusilla virus 12T         | YP_007676165 | 44.40%      | 3.27E-27  | 126(2-127)                                                                                  |                                                                    | transmembrane_regions(tmhmm,-1.0,15-33;-1.0,39-57)                        |
| 110 | 83,940   | 84,164 | 225    | 74  |                                                     |                                      |              |             |           |                                                                                             |                                                                    | signal-peptide(SignalP-NN(euk),-1.0,1-23)                                 |
|     |          |        |        |     |                                                     |                                      |              |             |           |                                                                                             |                                                                    | transmembrane_regions(tmhmm,-1.0,5-23)                                    |
|     |          |        |        |     |                                                     |                                      |              |             |           |                                                                                             |                                                                    | transmembrane_regions(tmhmm,-1.0,1-16)                                    |
|     |          |        |        |     |                                                     |                                      |              |             |           |                                                                                             |                                                                    | transmembrane_regions(tmhmm,-1.0,9-29;-1.0,43-63)                         |

| ID  | Position |        | Length |     | BlastP hit in GenBank nr and/or viruses data set |                                   |              |             |          | NCBI conserved domain (ID, E-value, alignment length in aa, alignment start - end position) | Interproscan matches (ID, E-value, alignment start - end position) |                                                                                      |
|-----|----------|--------|--------|-----|--------------------------------------------------|-----------------------------------|--------------|-------------|----------|---------------------------------------------------------------------------------------------|--------------------------------------------------------------------|--------------------------------------------------------------------------------------|
|     | start    | end    | nt     | aa  | ORF, protein encoded, or mass                    | Species                           | Accession    | Aa identity | E Value  |                                                                                             |                                                                    | Alignment length in aa (Start-end position)                                          |
| 111 | 84,190   | 84,510 | 321    | 106 | hypothetical protein OIV1_140c                   | Ostreococcus lucimarinus virus    | YP_004061773 | 69.40%      | 3.01E-43 | 98(1-98)                                                                                    | NTP-PPase_SsMazG(cd11535,2.00e-10,75,10-84)                        | Predicted pyrophosphohydrolase, MazG-related, Bacilli type(PIRSF036521,2.2E-6,1-101) |
|     |          |        |        |     | MazG nucleotide pyrophosphohydrolase             | Ktedonobacter racemifer DSM 44963 | ZP_06973402  | 32.60%      | 3.32E-09 | 92(8-99)                                                                                    | all-alpha NTP pyrophosphatases(SSF101386,7.6E-15,1-97)             |                                                                                      |
| 112 | 84,510   | 84,926 | 417    | 138 |                                                  |                                   |              |             |          |                                                                                             | transmembrane_regions(tmhmm,-1.0,119-133)                          |                                                                                      |
| 113 | 84,916   | 85,110 | 195    | 64  | hypothetical protein MPXG_00120                  | Micromonas pusilla virus SP1      | AET84918     | 42.60%      | 1.33E-02 | 47(1-47)                                                                                    |                                                                    | zf-AN1(PF01428,1.6E-5,3-42)                                                          |
|     |          |        |        |     | CHLNCDRAFT_144583                                | Chlorella variabilis              | EFN56686     | 41.30%      | 7.86E-02 | 62(3-64)                                                                                    | ZF_BBOX(PS50119,8.617,1-33)                                        |                                                                                      |
| 114 | 85,112   | 85,831 | 720    | 239 | hypothetical protein BpV2_126                    | Bathycoccus sp. RCC1105 virus     | ADQ91293     | 57.40%      | 1.12E-73 | 198(21-218)                                                                                 | YqaJ(pfam09588,9.97e-35,125,40-164)                                | Restriction endonuclease-like(SSF52980,1.1E-46,16-226)                               |
|     |          |        |        |     | PBCV-1 exonuclease (ISS)                         | Ostreococcus tauri                | XP_003081163 | 38.00%      | 6.00E-25 |                                                                                             | YqaJ(PF09588,7.7E-30,40-166)                                       |                                                                                      |
| 115 | 85,695   | 86,471 | 777    | 258 | ribonuclease III                                 | Micromonas pusilla virus PL1      | AET43609     | 60.60%      | 4.15E-89 | 211(12-222)                                                                                 | RIBOc(cd00593,3.15e-40,126,24-149)                                 | RNase III domain-like(SSF69065,5.4E-38,5-163)                                        |
|     |          |        |        |     |                                                  |                                   |              |             |          | DSRM(cd00048,1.53e-15,62,160-221)                                                           | DS_RBD(PS50137,11.82,160-225)                                      |                                                                                      |
| 116 | 86,477   | 86,986 | 510    | 169 |                                                  |                                   |              |             |          |                                                                                             | RNaseIII(TIGR02191,1.88e-65,205,17-221)                            | RNase_III(MF_00104,24.211,12-220)                                                    |
|     |          |        |        |     |                                                  |                                   |              |             |          |                                                                                             | signal-peptide(SignalP-NN(euk),-1.0,1-23)                          |                                                                                      |
| 117 | 87,019   | 87,408 | 390    | 129 |                                                  |                                   |              |             |          |                                                                                             | transmembrane_regions(tmhmm,-1.0,14-34)                            | transmembrane_regions(tmhmm,-1.0,108-128)                                            |

| ID  | Position |        | Length |     | BlastP hit in GenBank nr and/or viruses data set |                                                                               |                          |                  |                      |                                             | NCBI conserved domain (ID, E-value, alignment length in aa, alignment start - end position) | Interproscan matches (ID, E-value, alignment start - end position)                                                                                    |
|-----|----------|--------|--------|-----|--------------------------------------------------|-------------------------------------------------------------------------------|--------------------------|------------------|----------------------|---------------------------------------------|---------------------------------------------------------------------------------------------|-------------------------------------------------------------------------------------------------------------------------------------------------------|
|     | start    | end    | nt     | aa  | ORF, protein encoded, or mass                    | Species                                                                       | Accession                | Aa identity      | E Value              | Alignment length in aa (Start-end position) |                                                                                             |                                                                                                                                                       |
| 118 | 87,442   | 87,993 | 552    | 183 | hypothetical protein OLOG_00166                  | Ostreococcus lucimarinus virus OIV4                                           | AET84626                 | 37.80%           | 1.48E-28             | 173(1-173)                                  |                                                                                             |                                                                                                                                                       |
| 119 | 88,043   | 88,480 | 438    | 145 | hypothetical protein MPXG_00053                  | Micromonas pusilla virus SP1                                                  | AET84851                 | 45.60%           | 3.21E-29             | 133(3-135)                                  |                                                                                             | signal-peptide(SignalP-NN(euk),-1.0,1-26)<br>transmembrane_regions(tmhmm,-1.0,5-20)                                                                   |
| 120 | 88,516   | 88,881 | 366    | 121 | hypothetical protein MPWG_00126                  | Micromonas pusilla virus PL1                                                  | AET43614                 | 38.50%           | 1.32E-18             | 117(5-121)                                  |                                                                                             |                                                                                                                                                       |
| 121 | 88,894   | 89,265 | 372    | 123 | hypothetical protein OtV6_122c                   | Ostreococcus tauri virus RT-2011                                              | AFC35030                 | 51.20%           | 1.64E-26             | 126(3-128)                                  |                                                                                             | DUF3339(PF11820,3.2E-7,70-124)                                                                                                                        |
| 122 | 89,266   | 89,652 | 387    | 128 | hypothetical protein PRUPE_ppa026813mg           | Prunus persica                                                                | EMJ18658                 | 33.60%           | 1.28E-05             | 115(6-120)                                  |                                                                                             | signal-peptide(SignalP-NN(euk),-1.0,1-25)<br>transmembrane_regions(tmhmm,-1.0,9-29;-1.0,35-55;-1.0,70-88;-1.0,102-120)                                |
| 123 | 89,655   | 90,446 | 792    | 263 | hypothetical protein MPXG_00049                  | Micromonas pusilla virus SP1                                                  | AET84847                 | 37.70%           | 2.62E-51             | 256(1-256)                                  | Pat_ExoU_VipD_like(cd07207,2.90e-09,68,106-173)                                             | Patatin(PF01734,1.1E-12,9-183)                                                                                                                        |
|     |          |        |        |     | hypothetical protein F902_04067                  | Acinetobacter sp. CIP 70.18                                                   | ENX53198                 | 27.10%           | 5.17E-10             | 185(7-191)                                  | RssA(COG1752,5.33e-05,151,101-251)                                                          | FabD/lysophospholipase-like(SSF52151,5.4E-25,1-193)<br>signal-peptide(SignalP-NN(euk),-1.0,1-28)<br>transmembrane_regions(tmhmm,-1.0,5-25;-1.0,31-51) |
| 124 | 90,455   | 90,793 | 339    | 112 | hypothetical protein Ngar_c25890                 | Ostreococcus tauri virus RT-2011<br>Candidatus Nitrososphaera gargensis Ga9.2 | AFC35027<br>YP_006863168 | 45.80%<br>32.70% | 1.02E-11<br>2.76E-02 | 70(43-112)<br>93(6-98)                      |                                                                                             |                                                                                                                                                       |

| ID  | Position |        | Length |     | BlastP hit in GenBank nr and/or viruses data set |                                                      |              |             |           |                                             | NCBI conserved domain (ID, E-value, alignment length in aa, alignment start - end position) | Interproscan matches (ID, E-value, alignment start - end position)                  |
|-----|----------|--------|--------|-----|--------------------------------------------------|------------------------------------------------------|--------------|-------------|-----------|---------------------------------------------|---------------------------------------------------------------------------------------------|-------------------------------------------------------------------------------------|
|     | start    | end    | nt     | aa  | ORF, protein encoded, or mass                    | Species                                              | Accession    | Aa identity | E Value   | Alignment length in aa (Start-end position) |                                                                                             |                                                                                     |
| 125 | 90,786   | 91,337 | 552    | 183 |                                                  |                                                      |              |             |           |                                             |                                                                                             |                                                                                     |
| 126 | 91,346   | 92,809 | 1,464  | 487 |                                                  |                                                      |              |             |           |                                             |                                                                                             | transmembrane_regions(tmhmm,-1.0,195-215;-1.0,238-258)                              |
| 127 | 92,833   | 93,180 | 348    | 115 | hypothetical protein BpV1_099c                   | Bathycoccus sp. RCC1105 virus BpV1                   | YP_004061529 | 57.80%      | 6.43E-38  | 108(5-112)                                  | PDDEXK_3(pfam13366,1.71e-32,89,11-99)                                                       | PDDEXK_3(PF13366,1.5E-31,5-107)                                                     |
| 128 | 93,167   | 94,072 | 906    | 301 | hypothetical protein OLOG_00199                  | Prevotella melaninogenica 1 ATCC 25845               | YP_003814119 | 46.30%      | 1.70E-20  | 95(5-99)                                    |                                                                                             |                                                                                     |
| 129 | 94,101   | 94,268 | 168    | 55  |                                                  | Ostreococcus lucimarinus virus OIV4                  | AET84656     | 53.80%      | 6.32E-102 | 286(15-300)                                 |                                                                                             | Pox_VLTF3(PF04947,5.6E-55,130-299)                                                  |
| 130 | 94,254   | 94,496 | 243    | 80  |                                                  |                                                      |              |             |           |                                             |                                                                                             |                                                                                     |
| 131 | 94,528   | 95,265 | 738    | 245 | hypothetical protein OsV5_115f                   | Ostreococcus virus OsV5                              | YP_001648192 | 53.90%      | 2.94E-92  | 244(1-244)                                  | PCNA(cd00577,7.41e-50,242,4-245)                                                            | PROLIFERATING CELL NUCLEAR ANTIGEN(PTHR11352,8.9E-51,1-245)                         |
| 132 | 95,289   | 95,690 | 402    | 133 | proliferating cell nuclear antigen II BpV2_094   | Nicotiana tabacum Bathycoccus sp. RCC1105 virus BpV2 | AAD19905     | 32.60%      | 2.39E-45  | 245(1-245)                                  | PHA03383(PHA03383,2.87e-83,244,1-244)                                                       | DNA clamp(SSF55979,5.3E-30,1-124;4.2E-23,125-244)                                   |
| 133 | 95,740   | 96,186 | 447    | 148 |                                                  |                                                      |              |             |           |                                             |                                                                                             | signal-peptide(SignalP-NN(euk),-1.0,1-23)<br>transmembrane_regions(tmhmm,-1.0,5-25) |
| 134 | 96,214   | 96,582 | 369    | 122 | hypothetical protein VOLCADRAFT_99764            | Ostreococcus tauri virus 2                           | YP_004063530 | 39.40%      | 6.48E-21  | 121(1-121)                                  |                                                                                             |                                                                                     |
|     |          |        |        |     |                                                  | Volvox carteri f. nagariensis                        | XP_002958512 | 27.80%      | 7.93E-02  | 78(14-91)                                   |                                                                                             |                                                                                     |

| ID  | Position |         | Length |     | BlastP hit in GenBank nr and/or viruses data set |                                  |              |             |          |                                             |                                              | NCBI conserved domain (ID, E-value, alignment length in aa, alignment start - end position)                                                             | Interproscan matches (ID, E-value, alignment start - end position) |
|-----|----------|---------|--------|-----|--------------------------------------------------|----------------------------------|--------------|-------------|----------|---------------------------------------------|----------------------------------------------|---------------------------------------------------------------------------------------------------------------------------------------------------------|--------------------------------------------------------------------|
|     | start    | end     | nt     | aa  | ORF, protein encoded, or mass                    | Species                          | Accession    | Aa identity | E Value  | Alignment length in aa (Start-end position) |                                              |                                                                                                                                                         |                                                                    |
| 135 | 96,627   | 97,433  | 807    | 268 | hypothetical protein BpV2_091c                   | Bathycoccus sp. RCC1105 virus    | ADQ91258     | 37.10%      | 1.49E-38 | 225(4-228)                                  |                                              |                                                                                                                                                         |                                                                    |
| 136 | 97,457   | 97,669  | 213    | 70  | hypothetical protein MPVG_00125                  | Micromonas pusilla virus 12T     | YP_007676191 | 48.60%      | 1.56E-18 | 70(1-70)                                    |                                              | transmembrane_regions(tmhmm,-1.0,10-25;-1.0,44-64)                                                                                                      |                                                                    |
| 137 | 97,693   | 98,166  | 474    | 157 | hypothetical protein MpV1_101c                   | Micromonas sp. RCC1109 virus     | YP_004061984 | 34.40%      | 8.62E-21 | 150(1-150)                                  |                                              | transmembrane_regions(tmhmm,-1.0,91-109)                                                                                                                |                                                                    |
| 138 | 98,175   | 98,792  | 618    | 205 | EsV-1-42                                         | Ectocarpus siliculosus           | CBN80346     | 24.20%      | 3.75E-06 | 136(1-136)                                  |                                              |                                                                                                                                                         |                                                                    |
| 138 | 98,175   | 98,792  | 618    | 205 | hypothetical protein MPVG_00127                  | Micromonas pusilla virus 12T     | YP_007676193 | 40.60%      | 3.52E-44 | 176(2-177)                                  |                                              | transmembrane_regions(tmhmm,-1.0,50-70)                                                                                                                 |                                                                    |
| 139 | 98,817   | 99,086  | 270    | 89  | hypothetical protein BpV1_087c                   | Bathycoccus sp. RCC1105 virus    | YP_004061517 | 40.60%      | 6.41E-03 | 60(30-89)                                   |                                              |                                                                                                                                                         |                                                                    |
| 140 | 99,108   | 100,094 | 987    | 328 | hypothetical protein MpV1_098c                   | Micromonas sp. RCC1109 virus     | YP_004061981 | 36.40%      | 3.15E-47 | 327(2-328)                                  |                                              | signal-peptide(SignalP-NN(euk),-1.0,1-20)                                                                                                               |                                                                    |
| 140 | 99,108   | 100,094 | 987    | 328 | hypothetical protein OtV6_076                    | Ostreococcus tauri virus RT-2011 | AFC34984     | 42.90%      | 7.60E-99 | 391(1-391)                                  | Capsid_NCLDV(pfam04451,9.72e-31,182,206-387) | Capsid_NCLDV(PF04451,3.1E-28,205-386)<br>Adenovirus<br>PII,hexon,subdomain4(G3DSA:2.70.9.10,1.1E-33,35-223)                                             |                                                                    |
| 141 | 100,215  | 101,390 | 1,176  | 391 |                                                  |                                  |              |             |          |                                             |                                              | Group II dsDNA viruses<br>VP(SSF49749,5.0E-37,25-222;2.1E-15,223-391)<br>African swine fever virus, p72, major capsid (G3DSA:2.70.9.20,5.3E-20,225-391) |                                                                    |
| 142 | 101,513  | 102,070 | 558    | 185 | hypothetical protein                             | Ostreococcus tauri               | AFC34987     | 45.10%      | 9.38E-51 | 181(4-184)                                  | Ap6A_hydrolase(cd03673,2.08e-                | NUDIX(PS51462,9.302,4-168)                                                                                                                              |                                                                    |

| ID  | Position |         | Length |     | BlastP hit in GenBank nr and/or viruses data set |                                   |              |             |          | NCBI conserved domain (ID, E-value, alignment length in aa, alignment start - end position) | Interproscan matches (ID, E-value, alignment start - end position) |                                                                                                                                                                                |
|-----|----------|---------|--------|-----|--------------------------------------------------|-----------------------------------|--------------|-------------|----------|---------------------------------------------------------------------------------------------|--------------------------------------------------------------------|--------------------------------------------------------------------------------------------------------------------------------------------------------------------------------|
|     | start    | end     | nt     | aa  | ORF, protein encoded, or mass                    | Species                           | Accession    | Aa identity | E Value  |                                                                                             |                                                                    | Alignment length in aa (Start-end position)                                                                                                                                    |
|     |          |         |        |     | OtV6_079                                         | virus RT-2011                     |              |             |          |                                                                                             | 06,64,16-79)                                                       |                                                                                                                                                                                |
| 143 | 102,078  | 102,290 | 213    | 70  | glycosyl transferase group 8                     | Lactobacillus zeae KCTC 3804      | ZP_09452772  | 25.70%      | 1.27E-02 | 118(17-134)                                                                                 | GT8_A4GalT_like(cd04194,1.29e-06,177,18-194)                       | signal-peptide(SignalP-NN(euk),-1.0,1-4)<br>Glyco_transf_8(PF01501,9.0E-10,72-213)                                                                                             |
| 144 | 102,321  | 103,271 | 951    | 316 |                                                  |                                   |              |             |          |                                                                                             |                                                                    | signal-peptide(SignalP-NN(euk),-1.0,1-19)<br>Nucleotide-diphospho-sugar transferases(SSF53448,1.5E-14,1-234)                                                                   |
| 145 | 103,287  | 104,315 | 1029   | 342 | hypothetical protein MpV1_083                    | Micromonas sp. RCC1109 virus MpV1 | YP_004061966 | 36.40%      | 2.87E-57 | 292(13-304)                                                                                 |                                                                    |                                                                                                                                                                                |
| 146 | 104,603  | 104,932 | 330    | 109 | EsV-1-45                                         | Ectocarpus siliculosus            | CBN80349     | 27.00%      | 1.00E-04 |                                                                                             |                                                                    | Herpes_UL52(PF03121,6.4E-9,247-289)                                                                                                                                            |
| 146 | 104,603  | 104,932 | 330    | 109 | hypothetical protein MPWG_00172                  | Micromonas pusilla virus PL1      | AET43659     | 50.00%      | 3.65E-09 | 66(17-82)                                                                                   |                                                                    |                                                                                                                                                                                |
| 147 | 105,118  | 106,791 | 1,674  | 557 | YD repeat (two copies)                           | Lachnospiraceae bacterium 10-1    | WP_016229777 | 28.00%      | 4.00E-11 | 268(40-307)                                                                                 | FN3(cd00063,1.91e-04,82,33-114;8.40e-03,72,212-283)                | Fibronectin type III(SSF49265,8.3E-14,37-120;1.9E-10,120-213;2.8E-6,212-304)                                                                                                   |
| 148 | 106,866  | 107,126 | 261    | 86  |                                                  |                                   |              |             |          |                                                                                             |                                                                    | Immunoglobulin-like fold(G3DSA:2.60.40.10,7.6E-10,33-109;2.8E-6,121-213;2.3E-5,214-285)<br>signal-peptide(SignalP-NN(euk),-1.0,1-28)<br>transmembrane_regions(tmhmm,-1.0,4-19) |
| 149 | 107,148  | 107,774 | 627    | 208 | hypothetical protein OtV2_075                    | Ostreococcus tauri virus 2        | YP_004063508 | 67.30%      | 9.21E-87 | 191(3-193)                                                                                  | PRK13435(PRK13435,8.30e-03,38,30-67)                               |                                                                                                                                                                                |
|     |          |         |        |     | EsV-1-137                                        | Ectocarpus                        | CBN80435     | 27.00%      | 2.00E-03 |                                                                                             |                                                                    |                                                                                                                                                                                |



| ID  | Position |         | Length |     | BlastP hit in GenBank nr and/or viruses data set |                                               |              |             |           | NCBI conserved domain (ID, E-value, alignment length in aa, alignment start - end position) | Interproscan matches (ID, E-value, alignment start - end position)            |                                                                     |                                                                              |
|-----|----------|---------|--------|-----|--------------------------------------------------|-----------------------------------------------|--------------|-------------|-----------|---------------------------------------------------------------------------------------------|-------------------------------------------------------------------------------|---------------------------------------------------------------------|------------------------------------------------------------------------------|
|     | start    | end     | nt     | aa  | ORF, protein encoded, or mass                    | Species                                       | Accession    | Aa identity | E Value   |                                                                                             |                                                                               | Alignment length in aa (Start-end position)                         |                                                                              |
| 150 | 107,811  | 108,482 | 672    | 223 | hypothetical protein OIV1_090                    | siliculosus<br>Ostreococcus lucimarinus virus | YP_004061723 | 42.20%      | 4.67E-50  | 223(1-223)                                                                                  | AdoMet_MTases(cd02440,3.91e-10,101,26-126)                                    | Pox_MCEL(PF03291,3.8E-12,3-68;2.0E-4,87-152)                        |                                                                              |
|     |          |         |        |     | hypothetical protein Eycm_2270                   | Eremothecium cymbalariae                      | XP_003644833 | 32.80%      | 3.09E-18  | 200(3-202)                                                                                  | S-adenosyl-L-methionine-dependent methyltransferases(SSF53335,3.1E-20,17-221) |                                                                     |                                                                              |
|     |          |         |        |     | hypothetical protein MPXG_00018                  | Micromonas pusilla virus SP1                  | AET84816     | 39.00%      | 5.61E-26  | 138(4-141)                                                                                  | WLM(pfam08325,7.65e-06,58,68-125)                                             | WLM(PF08325,5.3E-8,66-126)                                          |                                                                              |
| 151 | 108,481  | 108,912 | 432    | 143 |                                                  |                                               |              |             |           |                                                                                             | signal-peptide(SignalP-NN(euk),-1.0,1-20)                                     | transmembrane_regions(tmhmm,-1.0,5-20)                              |                                                                              |
| 152 | 108,909  | 109,409 | 501    | 166 | hypothetical protein BpV1_077c                   | Bahycoccus sp.<br>RCC1105 virus               | YP_004061507 | 39.00%      | 4.75E-20  | 138(25-162)                                                                                 |                                                                               | transmembrane_regions(tmhmm,-1.0,104-122;-1.0,141-159)              |                                                                              |
| 153 | 109,450  | 110,235 | 786    | 261 | VV A32 virion packaging ATPase                   | Ostreococcus tauri virus 2                    | YP_004063517 | 62.10%      | 1.55E-128 | 261(1-261)                                                                                  | AAA(smarts00382,1.60e-03,122,17-138)                                          | no description(G3DSA:3.40.50.300,2.0E-4,17-140)                     |                                                                              |
|     |          |         |        |     | hypothetical protein OIV1_097                    | Ostreococcus lucimarinus virus OIV1           | YP_004061730 | 31.60%      | 3.96E-44  | 323(643-965)                                                                                | Capsid_NCLDV(pfam04451,1.50e-26,177,785-961)                                  | Capsid_NCLDV(PF04451,2.2E-30,785-960)                               |                                                                              |
| 154 | 110,268  | 113,168 | 2,901  | 966 |                                                  |                                               |              |             |           |                                                                                             | Adenovirus PII,hexon,subdomain 4(G3DSA:2.70.9.10,6.5E-23,652-805)             | Group II dsDNA viruses VP(SSF49749,5.8E-33,38-805; 1.7E-25,806-964) | African swine fever virus, p72,major capsid(G3DSA:2.70.9.20,2.2E-28,809-964) |

| ID  | Position |         | Length |     | BlastP hit in GenBank nr and/or viruses data set |                                                 |              |             |          | NCBI conserved domain (ID, E-value, alignment length in aa, alignment start - end position) | Interproscan matches (ID, E-value, alignment start - end position) |                                                                                                                                                     |
|-----|----------|---------|--------|-----|--------------------------------------------------|-------------------------------------------------|--------------|-------------|----------|---------------------------------------------------------------------------------------------|--------------------------------------------------------------------|-----------------------------------------------------------------------------------------------------------------------------------------------------|
|     | start    | end     | nt     | aa  | ORF, protein encoded, or mass                    | Species                                         | Accession    | Aa identity | E Value  |                                                                                             |                                                                    | Alignment length in aa (Start-end position)                                                                                                         |
|     |          |         |        |     |                                                  |                                                 |              |             |          |                                                                                             |                                                                    | signal-peptide(SignalP-NN(euk),-1.0,1-21)                                                                                                           |
|     |          |         |        |     | hypothetical protein MPXG_00023                  | Micromonas pusilla virus SP1                    | AET84821     | 31.00%      | 1.74E-39 | 357(1-357)                                                                                  | Capsid_NCLDV(pfam04451,7.85e-21,166,191-356)                       | Capsid_NCLDV(PF04451,5.6E-24,212-356)                                                                                                               |
|     |          |         |        |     | EsV-1-116                                        | Ectocarpus siliculosus                          | CBN80416     | 24.00%      | 9.40E+00 |                                                                                             |                                                                    | Adenovirus PII,hexon,subdomain 4(G3DSA:2.70.9.10,1.2E-17,43-155)                                                                                    |
| 155 | 113,184  | 114,314 | 1,131  | 376 |                                                  |                                                 |              |             |          |                                                                                             |                                                                    | Group II dsDNA viruses VP(SSF49749,3.3E-22,24-211; 6.8E-21,206-365)<br>African swine fever virus, p72,major capsid(G3DSA:2.70.9.20,1.4E-24,213-357) |
| 156 | 114,350  | 114,721 | 372    | 123 | hypothetical protein OV2_087                     | Ostreococcus tauri virus 2                      | YP_004063520 | 47.00%      | 1.61E-31 | 114(6-119)                                                                                  |                                                                    |                                                                                                                                                     |
| 157 | 114,722  | 114,892 | 171    | 56  |                                                  |                                                 |              |             |          |                                                                                             |                                                                    |                                                                                                                                                     |
| 158 | 114,894  | 115,178 | 285    | 94  | hypothetical protein MPXG_00025                  | Micromonas pusilla virus SP1                    | AET84823     | 54.70%      | 5.39E-26 | 86(8-93)                                                                                    |                                                                    | transmembrane_regions(tmhmm,-1.0,21-41;-1.0,51-71)                                                                                                  |
| 159 | 115,175  | 116,185 | 1,011  | 336 | hypothetical protein ATCVOR07043_989 R           | Acanthocystis turfacea Chlorella virus OR0704.3 | AGE59592     | 23.80%      | 2.37E-14 | 284(1-284)                                                                                  |                                                                    | transmembrane_regions(tmhmm,-1.0,304-324)                                                                                                           |
|     |          |         |        |     | 2OG-Fe(II) oxygenase                             | Prochlorococcus phage P-RSM4                    | YP_004323166 | 40.20%      | 2.32E-36 | 185(208-392)                                                                                | 2OG-FeII_Oxy_3(pfam13640, 1.68e-07,77,314-390)                     | 2OG-FeII_Oxy_3(PF13640,5.2E-9,314-390)                                                                                                              |
| 160 | 116,105  | 117,286 | 1,182  | 393 | puaive hydroxylase                               | Maricaulis maris MCS10                          | YP_756905    | 21.90%      | 6.58E-05 | 133(259-391)                                                                                |                                                                    | FE2OG_OXY(PS51471,10.828,308-392)                                                                                                                   |
|     |          |         |        |     |                                                  |                                                 |              |             |          |                                                                                             |                                                                    | UNCHARACTERIZED(PHR13029,3.4E-9,482-606)                                                                                                            |
| 161 | 117,261  | 119,087 | 1,827  | 608 |                                                  |                                                 |              |             |          |                                                                                             | Peptidase_S74(pfam13884,3.64e-10,57,502-558)                       | Peptidase_S74(PF13884,4.5E-12,502-558)                                                                                                              |

| ID  | Position |         | Length |     | BlastP hit in GenBank nr and/or viruses data set          |                                                 |              |             |          |                                             | NCBI conserved domain (ID, E-value, alignment length in aa, alignment start - end position) | Interproscan matches (ID, E-value, alignment start - end position)                 |
|-----|----------|---------|--------|-----|-----------------------------------------------------------|-------------------------------------------------|--------------|-------------|----------|---------------------------------------------|---------------------------------------------------------------------------------------------|------------------------------------------------------------------------------------|
|     | start    | end     | nt     | aa  | ORF, protein encoded, or mass                             | Species                                         | Accession    | Aa identity | E Value  | Alignment length in aa (Start-end position) |                                                                                             |                                                                                    |
| 162 | 119,098  | 121,914 | 2,817  | 938 | Chlorovirus glycoprotein repeat domain-containing protein | Acanthocystis turfacea Chlorella virus GM0701.1 | AGE53651     | 29.00%      | 3.55E-10 | 364(137-500)                                |                                                                                             | signal-peptide(SignalP-NN(euk),-1.0,1-15)                                          |
| 163 | 121,953  | 122,639 | 687    | 228 | LamG domain-containing protein                            | Cyclobacterium marinum DSM 745                  | YP_004772733 | 31.00%      | 1.04E-08 | 180(43-222)                                 | Laminin_G_3(pfam13385,2.11e-08,88,56-143)                                                   | Concanavalin A-like lectins/glucanases(SSF49899,2.5E-14,33-185)                    |
| 164 | 122,636  | 124,261 | 1,626  | 541 | hypothetical protein OSG_eHP7_00185, parial               | Environmental Halophage eHP-7                   | AFH21718     | 38.40%      | 1.42E-08 | 111(245-355)                                | Laminin_G_3(pfam13385,6.66e-21,153,66-218)                                                  | Concanavalin A-like lectin/glucanase, subgroup(G3DSA:2.60.120.200,6.2E-10,44-183)  |
| 165 | 124,290  | 125,807 | 1,518  | 505 | hypothetical protein ACD_8C00080G0006                     | uncultured bacterium                            | EKE19944     | 44.60%      | 1.40E-05 | 198(45-242)                                 | Laminin_G_3(pfam13385,3.40e-09,118,330-447)                                                 | Concanavalin A-like lectin/glucanase, subgroup(G3DSA:2.60.120.200,1.2E-15,297-482) |

| ID  | Position |         | Length |      | BlastP hit in GenBank nr and/or viruses data set          |                                                 |              |             |          |                                             | NCBI conserved domain (ID, E-value, alignment length in aa, alignment start - end position) | Interproscan matches (ID, E-value, alignment start - end position)                                                                                                                                                                                                                                                                    |
|-----|----------|---------|--------|------|-----------------------------------------------------------|-------------------------------------------------|--------------|-------------|----------|---------------------------------------------|---------------------------------------------------------------------------------------------|---------------------------------------------------------------------------------------------------------------------------------------------------------------------------------------------------------------------------------------------------------------------------------------------------------------------------------------|
|     | start    | end     | nt     | aa   | ORF, protein encoded, or mass                             | Species                                         | Accession    | Aa identity | E Value  | Alignment length in aa (Start-end position) |                                                                                             |                                                                                                                                                                                                                                                                                                                                       |
|     |          |         |        |      | Erv1/Alr protein family                                   | Lymphocysis disease virus - isolae China        | YP_073647    | 34.00%      | 2.70E-08 | 83(2-84)                                    | Evr1_Alr(pfam04777,1.69e-13,75,5-79)                                                        | Evr1_Alr(PF04777,7.2E-12,8-78)                                                                                                                                                                                                                                                                                                        |
| 166 | 125,812  | 126,075 | 264    | 87   | FAD-linked sulphhydryl oxidase                            | Galdieria sulphuraria                           | EME26178     | 29.00%      | 1.00E-04 |                                             |                                                                                             | FAD-dependent thiol oxidase(SSF69000,1.0E-12,2-87)<br>ERV_ALR(PS51324,15.999,1-84)<br>signal-peptide(SignalP-NN(euk),-1.0,1-22)                                                                                                                                                                                                       |
| 167 | 126,084  | 127,895 | 1,812  | 603  | PREDICTED:<br>uncharacterized protein LOC778550           | Ciona intestinalis                              | XP_002124516 | 39.60%      | 2.07E-08 | 140(344-483)                                |                                                                                             |                                                                                                                                                                                                                                                                                                                                       |
| 168 | 127,939  | 129,717 | 1,779  | 592  | hypothetical protein BRAFLDRAF_119089                     | Branchiosoma floridae                           | XP_002590999 | 49.20%      | 1.16E-15 | 128(311-438)                                |                                                                                             | Parallel beat-helix repeats(SM00710,6300.0,18-43;6600.0,57-82;3000.0,101-125;8700.0,199-220<br>4300.0 222-246<br>3000.0 257-282<br>6200.0 332-357<br>7100.0 385-407<br>2600.0 437-459<br>6300.0 476-501<br>6900.0 528-550<br>3800.0 606-631<br>3200.0 645-667<br>5700.0 702-724<br>7600.0 789-811<br>6500.0 841-863<br>1700.0 911-937 |
| 169 | 129,714  | 134,648 | 4,935  | 1644 | Chlorovirus glycoprotein repeat domain-containing protein | Acanthocystis turfacea Chlorella virus GM0701.1 | AGE53649     | 24.80%      | 7.04E-10 | 649(389-1037)                               |                                                                                             |                                                                                                                                                                                                                                                                                                                                       |

| ID  | Position |         | Length |     | BlastP hit in GenBank nr and/or viruses data set |                                     |              |             |          |                                             | NCBI conserved domain (ID, E-value, alignment length in aa, alignment start - end position) | Interproscan matches (ID, E-value, alignment start - end position) |
|-----|----------|---------|--------|-----|--------------------------------------------------|-------------------------------------|--------------|-------------|----------|---------------------------------------------|---------------------------------------------------------------------------------------------|--------------------------------------------------------------------|
|     | start    | end     | nt     | aa  | ORF, protein encoded, or mass                    | Species                             | Accession    | Aa identity | E Value  | Alignment length in aa (Start-end position) |                                                                                             |                                                                    |
|     |          |         |        |     |                                                  |                                     |              |             |          |                                             |                                                                                             | 3900.0 977-1010                                                    |
|     |          |         |        |     |                                                  |                                     |              |             |          |                                             |                                                                                             | 820.0 1247-1276                                                    |
| 170 | 134,698  | 134,937 | 240    | 79  |                                                  |                                     |              |             |          |                                             |                                                                                             |                                                                    |
| 171 | 135,057  | 135,242 | 186    | 61  |                                                  |                                     |              |             |          |                                             |                                                                                             |                                                                    |
| 172 | 135,325  | 135,876 | 552    | 183 |                                                  |                                     |              |             |          |                                             |                                                                                             |                                                                    |
| 173 | 135,886  | 136,470 | 585    | 194 | hypothetical protein MpV1_069                    | Micromonas sp. RCC1109 virus        | YP_004061952 | 29.90%      | 9.99E-08 | 121(20-140)                                 |                                                                                             | transmembrane_regions(tmhmm,-1.0,171-189)                          |
| 174 | 136,471  | 137,040 | 570    | 189 | hypothetical protein MPVG_00059                  | Micromonas pusilla virus 12T        | YP_007676127 | 32.40%      | 2.94E-15 | 179(8-186)                                  |                                                                                             |                                                                    |
| 175 | 137,061  | 137,378 | 318    | 105 | hypothetical protein OIV1_071                    | Ostreococcus lucimarinus virus OIV1 | YP_004061704 | 43.80%      | 3.71E-16 | 96(8-103)                                   |                                                                                             | signal-peptide(SignalP-NN(euk),-1.0,1-27)                          |
|     |          |         |        |     |                                                  |                                     |              |             |          |                                             |                                                                                             | transmembrane_regions(tmhmm,-1.0,7-25)                             |

| ID  | Position |         | Length |     | BlastP hit in GenBank nr and/or viruses data set        |                                       |              |             |           |                                             | NCBI conserved domain (ID, E-value, alignment length in aa, alignment start - end position) | Interproscan matches (ID, E-value, alignment start - end position)                                                                           |
|-----|----------|---------|--------|-----|---------------------------------------------------------|---------------------------------------|--------------|-------------|-----------|---------------------------------------------|---------------------------------------------------------------------------------------------|----------------------------------------------------------------------------------------------------------------------------------------------|
|     | start    | end     | nt     | aa  | ORF, protein encoded, or mass                           | Species                               | Accession    | Aa identity | E Value   | Alignment length in aa (Start-end position) |                                                                                             |                                                                                                                                              |
|     |          |         |        |     | hypothetical protein MPWG_00261                         | Micromonas pusilla virus PL1          | AET43745     | 49.20%      | 3.02E-93  | 340(2-341)                                  |                                                                                             |                                                                                                                                              |
| 176 | 137,454  | 138,530 | 1,077  | 358 | hypothetical protein VOLCADRAFT_99759                   | Volvox carteri f. nagariensis         | XP_002958510 | 48.30%      | 2.22E-35  | 142(119-260)                                |                                                                                             |                                                                                                                                              |
| 177 | 138,551  | 138,727 | 177    | 58  | hypothetical protein MPVG_00056                         | Micromonas pusilla virus 12T          | YP_007676124 | 46.40%      | 1.06E-07  | 54(3-56)                                    |                                                                                             | transmembrane_regions(tmhmm,-1.0,36-56)                                                                                                      |
|     | 138,724  | 140,091 | 1,368  | 455 | hypothetical protein BpV1_050                           | Bathycoccus sp. RCC1105 virus BpV1    | YP_004061480 | 54.50%      | 7.10E-162 | 441(4-444)                                  | DEXDc(cd00046,7.19e-11,123,108-230)                                                         | HELICASE_CTER(PS51194,6.68,301-447)                                                                                                          |
| 178 |          |         |        |     | EsV-1-66                                                | Ectocarpus siliculosus                | CBN80369     | 34.00%      | 1.00E-65  |                                             | HELICc(cd00079,1.79e-07,105,298-402)                                                        | HELICASE_ATP_BIND_1(PS51192,17.362,100-248)<br>P-loop containing nucleoside triphosphate hydrolases(SSF52540,3.1E-34,92-315;4.0E-16,105-443) |
| 179 | 140,075  | 140,353 | 279    | 92  | hypothetical protein MpV1_062                           | Micromonas sp. RCC1109 virus MpV1     | YP_004061945 | 28.60%      | 8.38E-06  | 69(1-69)                                    |                                                                                             |                                                                                                                                              |
| 180 | 140,362  | 141,735 | 1,374  | 457 | ESX-1 associated protein EspK, Alanine and Proline rich | Mycobacterium canettii CIPT 140070010 | YP_007266598 | 69.80%      | 1.24E-06  | 49(370-418)                                 |                                                                                             | transmembrane_regions(tmhmm,-1.0,436-456)                                                                                                    |
| 181 | 141,715  | 142,584 | 870    | 289 | hypothetical protein BpV2_045                           | Bathycoccus sp. RCC1105 virus BpV2    | ADQ91212     | 24.80%      | 7.70E-04  | 218(48-265)                                 |                                                                                             | transmembrane_regions(tmhmm,-1.0,248-266)                                                                                                    |
|     | 142,621  | 142,803 | 183    | 60  |                                                         |                                       |              |             |           |                                             |                                                                                             | signal-peptide(SignalP-NN(euk),-1.0,1-22)                                                                                                    |
| 182 |          |         |        |     |                                                         |                                       |              |             |           |                                             |                                                                                             | transmembrane_regions(tmhmm,-1.0,5-25)                                                                                                       |

| ID  | Position |         | Length |     | BlastP hit in GenBank nr and/or viruses data set |                                  |              |             |          |                                             | NCBI conserved domain (ID, E-value, alignment length in aa, alignment start - end position) | Interproscan matches (ID, E-value, alignment start - end position)                   |
|-----|----------|---------|--------|-----|--------------------------------------------------|----------------------------------|--------------|-------------|----------|---------------------------------------------|---------------------------------------------------------------------------------------------|--------------------------------------------------------------------------------------|
|     | start    | end     | nt     | aa  | ORF, protein encoded, or mass                    | Species                          | Accession    | Aa identity | E Value  | Alignment length in aa (Start-end position) |                                                                                             |                                                                                      |
| 183 | 142,800  | 143,579 | 780    | 259 | FAD-dependent thymidylate synthase               | Micromonas pusilla virus SP1     | AET85027     | 56.30%      | 3.63E-91 | 253(4-256)                                  | thyX(PRK00847,1.79e-89,210,1-210)                                                           | ThyX(MF_01408,28.21,1-215)                                                           |
|     |          |         |        |     | thymidylate synthase                             | Dictyostelium purpureum          | XP_003285756 | 52.40%      | 6.37E-88 | 257(2-258)                                  |                                                                                             |                                                                                      |
| 184 | 143,607  | 144,269 | 663    | 220 |                                                  |                                  |              |             |          |                                             |                                                                                             | signal-peptide(SignalP-NN(euk),-1.0,1-42)<br>transmembrane_regions(tmhmm,-1.0,28-50) |
| 185 | 144,269  | 144,955 | 687    | 228 | hypothetical protein MPVG_00042                  | Micromonas pusilla virus 12T     | YP_007676110 | 56.10%      | 2.12E-86 | 227(1-227)                                  | Pox_A22(pfam04848,4.39e-06,158,2-159)                                                       | Pox_A22(PF04848,6.1E-13,2-159)                                                       |
|     |          |         |        |     | hypothetical protein CAOG_03684                  | Capsaspora owczarzaki ATCC 30864 | EFW45700     | 26.00%      | 2.20E-01 |                                             |                                                                                             | Ribonuclease H-like(SSF53098,4.1E-14,2-160)                                          |
|     | 144,915  | 145,487 | 573    | 190 | hypothetical protein OtV6_048c                   | Ostreococcus tauri virus RT-2011 | AFC34956     | 39.60%      | 1.09E-32 | 155(31-185)                                 |                                                                                             | zf-FCS(PF06467,9.3E-7,26-72)                                                         |
| 186 |          |         |        |     | EsV-1-96                                         | Ectocarpus siliculosus           | CBN80398     | 34.00%      | 8.00E-06 |                                             |                                                                                             | signal-peptide(SignalP-NN(euk),-1.0,1-37)<br>transmembrane_regions(tmhmm,-1.0,15-35) |
| 187 | 145,484  | 145,807 | 324    | 107 |                                                  |                                  |              |             |          |                                             |                                                                                             |                                                                                      |
|     |          |         |        |     | hypothetical protein OtV2_041                    | Ostreococcus tauri virus 2       | YP_004063474 | 52.60%      | 4.05E-17 | 75(3-77)                                    |                                                                                             |                                                                                      |
| 188 | 145,800  | 146,039 | 240    | 79  | hypothetical protein VOLCADRAFT_105974           | Volvox carteri f. nagariensis    | XP_002953453 | 36.00%      | 1.14E-05 | 71(7-77)                                    |                                                                                             |                                                                                      |
| 189 | 146,103  | 146,270 | 168    | 55  |                                                  |                                  |              |             |          |                                             |                                                                                             |                                                                                      |
|     |          |         |        |     | transcription elongation factor SII              | Micromonas pusilla virus 12T     | YP_007676093 | 39.50%      | 3.37E-38 | 185(31-215)                                 | TFIIS_C(pfam01096,1.79e-17,39,176-214)                                                      | C2C2 Zinc finger(SM00440,2.2E-18,176-215)                                            |
| 190 | 146,233  | 146,880 | 648    | 215 | hypothetical protein COCSUDRAFT_256              | Coccomyxa subellipsoidea C-      | EIE19640     | 44.30%      | 3.14E-17 | 97(118-214)                                 |                                                                                             | TRANSCRIPTION ELONGATION FACTOR S-II(PTHR11477,4.6E-19,172-                          |

| ID  | Position |         | Length |     | BlastP hit in GenBank nr and/or viruses data set |                                            |              |             |          |                                             | NCBI conserved domain (ID, E-value, alignment length in aa, alignment start - end position) | Interproscan matches (ID, E-value, alignment start - end position) |      |
|-----|----------|---------|--------|-----|--------------------------------------------------|--------------------------------------------|--------------|-------------|----------|---------------------------------------------|---------------------------------------------------------------------------------------------|--------------------------------------------------------------------|------|
|     | start    | end     | nt     | aa  | ORF, protein encoded, or mass                    | Species                                    | Accession    | Aa identity | E Value  | Alignment length in aa (Start-end position) |                                                                                             |                                                                    |      |
|     |          |         |        |     | 84                                               |                                            |              |             |          |                                             |                                                                                             |                                                                    | 214) |
| 191 | 146,861  | 147,748 | 888    | 295 | capsular polysaccharide synthesis                | Acidovorax avenae subsp. avenae ATCC 19860 | YP_004232817 | 31.10%      | 1.40E-37 | 270(24-293)                                 | Gly_transf_sug(pfam04488,5.76e-04,80,44-123)                                                | Caps_synth(PF05704,2.8E-27,21-157)                                 |      |
| 192 | 147,768  | 148,403 | 636    | 211 | Protein of unknown function (DUF3431)            | Desulfovibrio sp. U5L                      | ZP_10077131  | 36.10%      | 7.47E-03 | 72(25-96)                                   | DUF3431(pfam11913,2.32e-04,38,64-101)                                                       | signal-peptide(SignalP-NN(euk),-1.0,1-19)                          |      |
| 193 | 148,445  | 148,861 | 417    | 138 |                                                  |                                            |              |             |          |                                             |                                                                                             | transmembrane_regions(tmhm,-1.0,5-20)                              |      |
| 194 | 149,014  | 149,295 | 282    | 93  | hypothetical protein BpV1_020c                   | Bathycoccus sp. RCC1105 virus BpV1         | YP_004061450 | 36.50%      | 2.70E-12 | 83(7-89)                                    |                                                                                             |                                                                    |      |
| 195 | 149,261  | 149,725 | 465    | 154 | hypothetical protein MPXG_00183                  | Micromonas pusilla virus SP1               | AET84981     | 38.10%      | 6.98E-14 | 97(2-98)                                    | RING(cd00162,8.64e-07,44,4-47)                                                              | Zinc finger, RING/FYVE/PHD-type(G3DSA:3.30.40.10,4.7E-11,3-55)     |      |
| 196 | 149,827  | 150,381 | 555    | 184 | hypothetical protein COCSUDRAFT_67348            | Coccomyxa subellipsoidea C-169             | EIE20408     | 42.90%      | 1.92E-06 | 52(3-54)                                    |                                                                                             | PEROXISOME ASSEMBLY PROTEIN 10(PTHR23350,1.2E-4,1-48)              |      |
| 197 | 150,399  | 150,854 | 456    | 151 | hypothetical protein OIV1_201                    | Ostreococcus lucimarinus virus OIV1        | YP_004061833 | 41.90%      | 1.86E-14 | 115(15-129)                                 |                                                                                             |                                                                    |      |
| 198 | 150,829  | 151,323 | 495    | 164 | hypothetical protein SSON53_00120                | Shigella sonnei 53G                        | YP_005454613 | 32.20%      | 1.34E-02 | 82(23-104)                                  |                                                                                             | Aspartate decarboxylase-like domain(G3DSA:2.40.40.20,4.4E-9,3-72)  |      |



| ID  | Position |         | Length |     | BlastP hit in GenBank nr and/or viruses data set      |                                                |              |             |          |                                             | NCBI conserved domain (ID, E-value, alignment length in aa, alignment start - end position) | Interproscan matches (ID, E-value, alignment start - end position) |  |
|-----|----------|---------|--------|-----|-------------------------------------------------------|------------------------------------------------|--------------|-------------|----------|---------------------------------------------|---------------------------------------------------------------------------------------------|--------------------------------------------------------------------|--|
|     | start    | end     | nt     | aa  | ORF, protein encoded, or mass                         | Species                                        | Accession    | Aa identity | E Value  | Alignment length in aa (Start-end position) |                                                                                             |                                                                    |  |
|     |          |         |        |     | 82                                                    |                                                |              |             |          |                                             |                                                                                             |                                                                    |  |
| 199 | 151,354  | 152,019 | 666    | 221 |                                                       |                                                |              |             |          |                                             |                                                                                             |                                                                    |  |
| 200 | 151,957  | 152,376 | 420    | 139 | hypothetical protein BB_N41                           | Borrelia burgdorferi B31                       | NP_051452    | 35.30%      | 9.54E-02 | 51(67-117)                                  |                                                                                             |                                                                    |  |
| 201 | 152,351  | 152,722 | 372    | 123 |                                                       |                                                |              |             |          |                                             |                                                                                             |                                                                    |  |
| 202 | 152,747  | 153,151 | 405    | 134 |                                                       |                                                |              |             |          |                                             |                                                                                             |                                                                    |  |
| 203 | 153,175  | 154,995 | 1,821  | 606 | PBCV-specific basic adaptor domain-containing protein | Acanthocystis turfacea Chlorella virus Canal-1 | AGE50033     | 28.10%      | 6.21E-12 | 267(5-271)                                  |                                                                                             |                                                                    |  |
| 204 | 155,001  | 155,333 | 333    | 110 |                                                       |                                                |              |             |          |                                             |                                                                                             |                                                                    |  |
| 205 | 155,354  | 155,614 | 261    | 86  |                                                       |                                                |              |             |          |                                             |                                                                                             |                                                                    |  |
| 206 | 155,733  | 156,143 | 411    | 136 |                                                       |                                                |              |             |          |                                             |                                                                                             |                                                                    |  |
| 207 | 156,362  | 156,598 | 237    | 78  |                                                       |                                                |              |             |          |                                             |                                                                                             |                                                                    |  |
| 208 | 156,623  | 156,862 | 240    | 79  |                                                       |                                                |              |             |          |                                             |                                                                                             |                                                                    |  |
| 209 | 156,887  | 157,078 | 192    | 63  |                                                       |                                                |              |             |          |                                             |                                                                                             |                                                                    |  |
| 210 | 157,112  | 157,495 | 384    | 127 | hypothetical protein Oscil6304_6037                   | Oscillatoria acuminata PCC 6304                | YP_007100729 | 27.00%      | 7.00E-01 | 84(39-122)                                  |                                                                                             |                                                                    |  |
| 211 | 157,520  | 157,900 | 381    | 126 | hypothetical protein PGUG_01549                       | Meyerozyma guilliermondii ATCC 6260            | EDK37451     | 32.60%      | 1.08E-02 | 84(30-113)                                  | Acetyltransf_7(pfam13508,8.70e-08,70,22-91)                                                 | Acyl-CoA N-acyltransferase(G3DSA:3.40.630.30,1.1E-5,23-87)         |  |
| 212 | 158,077  | 158,484 | 408    | 135 | N-acetyltransferase GCN5                              | Sebaldella termitidis ATCC 33386               | YP_003310592 | 32.60%      | 2.88E-03 | 87(41-127)                                  | Acetyltransf_7(pfam13508,1.41e-04,77,49-125)                                                | Acyl-CoA N-acyltransferase(G3DSA:3.40.630.30,1.1E-5,44-129)        |  |
| 213 | 158,489  | 158,656 | 168    | 55  |                                                       |                                                |              |             |          |                                             |                                                                                             |                                                                    |  |
| 214 | 158,664  | 158,879 | 216    | 71  |                                                       |                                                |              |             |          |                                             |                                                                                             |                                                                    |  |
| 215 | 158,879  | 159,058 | 180    | 59  |                                                       |                                                |              |             |          |                                             |                                                                                             |                                                                    |  |
| 216 | 159,091  | 159,672 | 582    | 193 | C3HC4 finger protein                                  | Aspergillus flavus NRRL3357                    | XP_002378950 | 41.30%      | 1.05E-04 | 59(133-191)                                 | ThylakoidFormat Superfamily(c112138,4.73e-                                                  | Zinc finger, RING/FYVE/PHD-type(G3DSA:3.30.40.10,4.7E-10,132-186)  |  |

| ID  | Position |         | Length |     | BlastP hit in GenBank nr and/or viruses data set                                                                                                     |                                           |              |             |          | NCBI conserved domain (ID, E-value, alignment length in aa, alignment start - end position) | Interproscan matches (ID, E-value, alignment start - end position) |                                                                           |
|-----|----------|---------|--------|-----|------------------------------------------------------------------------------------------------------------------------------------------------------|-------------------------------------------|--------------|-------------|----------|---------------------------------------------------------------------------------------------|--------------------------------------------------------------------|---------------------------------------------------------------------------|
|     | start    | end     | nt     | aa  | ORF, protein encoded, or mass                                                                                                                        | Species                                   | Accession    | Aa identity | E Value  |                                                                                             |                                                                    | Alignment length in aa (Start-end position)                               |
|     |          |         |        |     |                                                                                                                                                      |                                           |              |             |          |                                                                                             | 03,37,84-120)                                                      |                                                                           |
|     |          |         |        |     | protein ORF144                                                                                                                                       | Cyprinid herpesvirus 2                    | YP_007003959 | 41.30%      | 3.58E-04 | 46(134-179)                                                                                 | RING(cd00162,7.19e-06,47,137-183)                                  | RING/U-box(SSF57850,5.4E-10,122-186)                                      |
|     |          |         |        |     | Chain B, Structure Of A Beta-Trcp1-Skp1-Beta-Catenin Complex: Destruction Motif Binding And Lysine Specificity On The Scfbeta-Trcp1 Ubiquitin Ligase | Homo sapiens                              | IP22_B       | 31.10%      | 1.22E-11 | 111(1-111)                                                                                  | Skp1(smart00512,1.23e-09,80,3-82)                                  | SKP1(PTHR11165,7.0E-12,3-111)                                             |
| 217 | 159,664  | 159,999 | 336    | 111 | hypothetical protein FR483_N799R                                                                                                                     | Paramecium bursaria Chlorella virus FR483 | YP_001426431 | 33.10%      | 2.47E-09 | 111(1-111)                                                                                  |                                                                    | BTB/POZ fold(G3DSA:3.30.710.10,7.8E-14,2-111)                             |
|     | 160,039  | 160,383 | 345    | 114 | multidrug resistance protein MdtJ                                                                                                                    | Yersinia pseudotuberculosis IP 31758      | YP_001400993 | 33.30%      | 5.88E-04 | 102(13-114)                                                                                 |                                                                    | transmembrane_regions(tmhmm,-1.0,42-62;-1.0,68-88)                        |
| 218 |          |         |        |     |                                                                                                                                                      |                                           |              |             |          |                                                                                             |                                                                    | Multidrug resistance efflux transporter EmrE(SSF103481,6.5E-6,13-113)     |
| 219 | 160,422  | 160,718 | 297    | 98  |                                                                                                                                                      |                                           |              |             |          |                                                                                             |                                                                    | signal-peptide(SignalP-NN(euk),-1.0,1-39)                                 |
|     | 160,724  | 160,891 | 168    | 55  |                                                                                                                                                      |                                           |              |             |          |                                                                                             |                                                                    | transmembrane_regions(tmhmm,1.0,21-39)                                    |
| 220 |          |         |        |     |                                                                                                                                                      |                                           |              |             |          |                                                                                             |                                                                    | Exonuclease, phage-type/RecB, C-terminal(G3DSA:3.90.320.10,1.0E-9,98-239) |
|     | 161,057  | 161,791 | 735    | 244 | hypothetical protein OLOG_00261                                                                                                                      | Ostreococcus lucimarinus virus OIV4       | AET84716     | 42.20%      | 1.65E-53 | 234(1-234)                                                                                  | phage_re1_nuc(TIGR03033,5.29e-03,59,2-60)                          |                                                                           |
| 221 |          |         |        |     |                                                                                                                                                      |                                           |              |             |          |                                                                                             | PDDEXK_1(pfam12705,8.05e-03,59,138-196)                            | YqaJ(PF09588,5.5E-5,2-199)                                                |

| ID  | Position |         | Length |     | BlastP hit in GenBank nr and/or viruses data set |                                           |              |             |          | NCBI conserved domain (ID, E-value, alignment length in aa, alignment start - end position) | Interproscan matches (ID, E-value, alignment start - end position) |                                                                                                                                                                                     |
|-----|----------|---------|--------|-----|--------------------------------------------------|-------------------------------------------|--------------|-------------|----------|---------------------------------------------------------------------------------------------|--------------------------------------------------------------------|-------------------------------------------------------------------------------------------------------------------------------------------------------------------------------------|
|     | start    | end     | nt     | aa  | ORF, protein encoded, or mass                    | Species                                   | Accession    | Aa identity | E Value  |                                                                                             |                                                                    | Alignment length in aa (Start-end position)                                                                                                                                         |
| 222 | 161,826  | 162,107 | 282    | 93  | CP12 domain protein                              | Coleofasciculus chthonoplastes            | WP_006106059 | 32.30%      | 5.50E-02 | 90(3-92)                                                                                    | CP12(pfam02672,5.22e-03,42,31-72)                                  | CP12(PF02672,2.8E-6,31-73)                                                                                                                                                          |
| 223 | 162,167  | 162,820 | 654    | 217 |                                                  |                                           |              |             |          |                                                                                             |                                                                    |                                                                                                                                                                                     |
| 224 | 162,854  | 163,072 | 219    | 72  |                                                  |                                           |              |             |          |                                                                                             |                                                                    | signal-peptide(SignalP-NN(euk),-1.0,1-20)                                                                                                                                           |
| 225 | 163,085  | 163,360 | 276    | 91  |                                                  |                                           |              |             |          |                                                                                             |                                                                    |                                                                                                                                                                                     |
| 226 | 163,382  | 164,053 | 672    | 223 | hypothetical protein MPXG_00109                  | Micromonas pusilla virus SP1              | AET84907     | 24.00%      | 1.70E-09 | 152(16-167)                                                                                 |                                                                    | transmembrane_regions(tmhmm,-1.0,52-70;-1.0,80-100)                                                                                                                                 |
| 227 | 164,046  | 164,384 | 339    | 112 |                                                  |                                           |              |             |          |                                                                                             |                                                                    | signal-peptide(SignalP-NN(euk),-1.0,1-28)                                                                                                                                           |
| 228 | 164,393  | 164,896 | 504    | 167 |                                                  |                                           |              |             |          |                                                                                             |                                                                    |                                                                                                                                                                                     |
| 229 | 164,930  | 165,460 | 531    | 176 | putative ring zinc finger protein, partial       | Cucumis sativus                           | AEP25855     | 41.20%      | 4.83E-06 | 65(112-176)                                                                                 | RING(cd00162,1.35e-04,50,125-174)                                  | Zinc finger, RING/FYVE/PHD-type(G3DSA:3.30.40.10,2.7E-12,123-175)<br>RING/U-box(SSF57850,8.8E-14,93-175)                                                                            |
| 230 | 165,483  | 165,710 | 228    | 75  |                                                  |                                           |              |             |          |                                                                                             |                                                                    |                                                                                                                                                                                     |
| 231 | 165,711  | 165,983 | 273    | 90  |                                                  |                                           |              |             |          |                                                                                             |                                                                    |                                                                                                                                                                                     |
|     | 165,970  | 166,917 | 948    | 315 | conserved hypothetical protein                   | Albugo laibachii Nc14                     | CCA21495     | 35.60%      | 2.25E-47 | 305(2-306)                                                                                  | DnaJ_bact(TIGR02349,2.40e-70,308,2-309)                            | DnaJ/Hsp40 cysteine-rich domain(SSF57938,3.8E-6,114-185)<br>Chaperone J-domain(SSF46565,1.6E-26,1-106)<br>HSP40/DnaJ peptide-binding domain(SSF49493,3.2E-12,92-232;7.4E-9,233-305) |
| 232 |          |         |        |     |                                                  |                                           |              |             |          |                                                                                             |                                                                    |                                                                                                                                                                                     |
| 233 | 166,942  | 167,376 | 435    | 144 |                                                  |                                           |              |             |          |                                                                                             |                                                                    |                                                                                                                                                                                     |
| 234 | 167,385  | 169,250 | 1,866  | 621 |                                                  |                                           |              |             |          |                                                                                             |                                                                    |                                                                                                                                                                                     |
|     | 169,311  | 169,934 | 624    | 207 | endonuclease HhaII                               | Paramecium bursaria Chlorella virus CVB-1 | AGE50806     | 33.30%      | 1.23E-33 | 203(1-203)                                                                                  |                                                                    |                                                                                                                                                                                     |
| 235 |          |         |        |     | hypothetical protein cco10_08933                 | Campylobacter coli 90-3                   | ZP_14078815  | 28.80%      | 4.23E-12 | 203(1-203)                                                                                  |                                                                    |                                                                                                                                                                                     |

| ID  | Position |         | Length |     | BlastP hit in GenBank nr and/or viruses data set |                                 |              |             |           | NCBI conserved domain (ID, E-value, alignment length in aa, alignment start - end position) | Interproscan matches (ID, E-value, alignment start - end position) |                                                                                                                            |
|-----|----------|---------|--------|-----|--------------------------------------------------|---------------------------------|--------------|-------------|-----------|---------------------------------------------------------------------------------------------|--------------------------------------------------------------------|----------------------------------------------------------------------------------------------------------------------------|
|     | start    | end     | nt     | aa  | ORF, protein encoded, or mass                    | Species                         | Accession    | Aa identity | E Value   |                                                                                             |                                                                    | Alignment length in aa (Start-end position)                                                                                |
| 236 | 169,911  | 170,975 | 1,065  | 354 | site-specific DNA-methyltransferase CviBI        | Micromonas pusilla virus 12T    | YP_007676256 | 56.00%      | 2.19E-103 | 259(95-353)                                                                                 | dam(TIGR00571,9.03e-69,258,95-352)                                 | dam: DNA adenine methylase(TIGR00571,4.7E-68,95-352)                                                                       |
|     |          |         |        |     | N.BstNBI methyltransferase                       | Geobacillus stearothermophilus  | AAK08495     | 38.90%      | 3.02E-53  | 259(95-353)                                                                                 |                                                                    | S-adenosyl-L-methionine-dependent methyltransferases(SSF53335,1.8E-50,94-353)<br>signal-peptide(SignalP-NN(euk),-1.0,1-21) |
| 237 | 170,866  | 171,573 | 708    | 235 |                                                  |                                 |              |             |           |                                                                                             |                                                                    |                                                                                                                            |
| 238 | 171,740  | 171,925 | 186    | 61  |                                                  |                                 |              |             |           |                                                                                             |                                                                    |                                                                                                                            |
| 239 | 171,988  | 172,296 | 309    | 102 | dihydrodipicolinate synthetase                   | Lentibacillus sp. Grbi          | ZP_09918746  | 33.80%      | 4.84E-02  | 60(18-77)                                                                                   |                                                                    |                                                                                                                            |
| 240 | 172,293  | 173,111 | 819    | 272 | hypothetical protein SFHH103_00274               | Sinorhizobium fredii HH103      | YP_005187601 | 33.20%      | 2.92E-18  | 182(73-254)                                                                                 |                                                                    |                                                                                                                            |
|     |          |         |        |     | gp15                                             | Mycobacterium phage Thibault    | AEJ93965     | 29.20%      | 5.32E-10  | 133(2-134)                                                                                  |                                                                    |                                                                                                                            |
| 241 | 173,145  | 173,837 | 693    | 230 | hypothetical protein NAEGRDRAFT_59766            | Naegleria gruberi               | XP_002670181 | 43.30%      | 2.59E-48  | 211(20-230)                                                                                 | Glyco_hydro_cc ( pfam11790 , 1.59e-48, 180, 48-227)                | Glyco_hydro_cc(PF11790 ,1.9E-52,10-227)                                                                                    |
| 242 | 173,781  | 174,059 | 279    | 92  | 248R                                             | Invertebrate iridescent virus 6 | NP_149711    | 35.40%      | 6.09E-08  | 75(1-75)                                                                                    |                                                                    | signal-peptide(SignalP-NN(euk),-1.0,1-44)                                                                                  |
|     |          |         |        |     |                                                  |                                 |              |             |           |                                                                                             |                                                                    | transmembrane_regions(tmhmm,-1.0,21-43;-1.0,49-67)                                                                         |
| 243 | 174,094  | 174,714 | 621    | 206 |                                                  |                                 |              |             |           |                                                                                             |                                                                    |                                                                                                                            |
| 244 | 174,683  | 175,435 | 753    | 250 |                                                  |                                 |              |             |           |                                                                                             |                                                                    |                                                                                                                            |
|     | 175,465  | 176,760 | 1,296  | 431 | DNA ligase                                       | Vibrio phage KVP40              | NP_899305    | 37.40%      | 2.09E-70  | 427(5-431)                                                                                  | DNA_ligase_A_M ( pfam01068 , 2.28e-20, 194, 142-335)               | DNA_ligase_A_M(PF01068,5.1E-22,146-335)                                                                                    |
| 245 |          |         |        |     | hypothetical protein Mpe_B0266                   | Methylibium petroleiphilum PM1  | YP_001023276 | 35.00%      | 1.84E-46  | 427(5-431)                                                                                  |                                                                    | Nucleic acid-binding proteins(SSF50249,3.3E-15,308-422)                                                                    |

| ID     | Position |         | Length |      | BlastP hit in GenBank nr and/or viruses data set |                                            |                |             |           | NCBI conserved domain (ID, E-value, alignment length in aa, alignment start - end position) | Interproscan matches (ID, E-value, alignment start - end position) |                                                                                             |
|--------|----------|---------|--------|------|--------------------------------------------------|--------------------------------------------|----------------|-------------|-----------|---------------------------------------------------------------------------------------------|--------------------------------------------------------------------|---------------------------------------------------------------------------------------------|
|        | start    | end     | nt     | aa   | ORF, protein encoded, or mass                    | Species                                    | Accession      | Aa identity | E Value   |                                                                                             |                                                                    | Alignment length in aa (Start-end position)                                                 |
|        |          |         |        |      |                                                  |                                            |                |             |           |                                                                                             |                                                                    | DNA ligase/mRNA capping enzyme, catalytic domain(SSF56091,2.6E-31,135-335)                  |
| 246    | 176,819  | 177,091 | 273    | 90   | hypothetical protein<br>DICPUDRAFT_1558<br>57    | Dictyostelium<br>purpureum                 | XP_003291267   | 39.00%      | 1.54E-07  | 49(2-50)                                                                                    | zf-C3HC4_2 ( pfam13923, 3.33e-03, 44,2-45)                         | zf-RING_2(PF13639,7.9E-11,2-45)                                                             |
|        |          |         |        |      | hypothetical protein<br>EXVG_00190               | Emiliana huxleyi<br>virus 202              | AET42539       | 37.50%      | 5.53E-06  | 63(3-65)                                                                                    |                                                                    | RING FINGER PROTEIN 24-RELATED(PTHR22766,2.4E-8,19-62)<br>RING/U-box(SSF57850,5.3E-11,3-50) |
| 247    | 177,080  | 177,313 | 234    | 77   |                                                  |                                            |                |             |           |                                                                                             |                                                                    |                                                                                             |
| 248    | 177,328  | 177,870 | 543    | 180  |                                                  |                                            |                |             |           |                                                                                             |                                                                    |                                                                                             |
| YSLPV2 |          |         |        |      |                                                  |                                            |                |             |           |                                                                                             |                                                                    |                                                                                             |
| 1      | 514      | 663     | 150    | 49   |                                                  |                                            |                |             |           |                                                                                             |                                                                    | signal-peptide(SignalP-NN(euk),-1.0,1-36)                                                   |
| 2      | 884      | 2,635   | 1752   | 583  | tail fiber-like protein                          | Chromobacterium<br>violaceum ATCC<br>12472 | NP_900088      | 25.30%      | 4.29E-06  | 355(228-582)                                                                                |                                                                    |                                                                                             |
| 3      | 2,809    | 2,970   | 162    | 53   |                                                  |                                            |                |             |           |                                                                                             |                                                                    |                                                                                             |
| 4      | 3,056    | 7,192   | 4137   | 1378 | putative low-complexity protein                  | Leptolyngbya sp.<br>PCC 7375               | WP_006512875.1 | 28.00%      | 3.00E-26  | 519(236-754)                                                                                |                                                                    |                                                                                             |
| 5      | 7,221    | 9,839   | 2619   | 872  | hypothetical protein<br>SXBG_00214               | Synechococcus<br>phage S-CAM1              | YP_007673127   | 45.80%      | 3.15E-145 | 651(175-825)                                                                                |                                                                    |                                                                                             |
|        |          |         |        |      | hypothetical protein<br>Dred_1404                | Desulfotomaculum<br>reducens MI-1          | YP_001112759   | 34.90%      | 3.45E-04  | 85(494-578)                                                                                 |                                                                    |                                                                                             |
| 6      | 9,830    | 10,435  | 606    | 201  |                                                  |                                            |                |             |           |                                                                                             |                                                                    |                                                                                             |
| 7      | 10,626   | 10,808  | 183    | 60   |                                                  |                                            |                |             |           |                                                                                             | SKN1(pfam03935,9.42e-03,35,7-41)                                   |                                                                                             |

| ID | Position |        | Length |      | BlastP hit in GenBank nr and/or viruses data set |                                          |                |             |          |                                             |                                                                              | NCBI conserved domain (ID, E-value, alignment length in aa, alignment start - end position) | Interproscan matches (ID, E-value, alignment start - end position) |
|----|----------|--------|--------|------|--------------------------------------------------|------------------------------------------|----------------|-------------|----------|---------------------------------------------|------------------------------------------------------------------------------|---------------------------------------------------------------------------------------------|--------------------------------------------------------------------|
|    | start    | end    | nt     | aa   | ORF, protein encoded, or mass                    | Species                                  | Accession      | Aa identity | E Value  | Alignment length in aa (Start-end position) |                                                                              |                                                                                             |                                                                    |
| 8  | 10,831   | 15,501 | 4671   | 1556 | virion structural protein                        | Cyanophage S-TIM5                        | YP_007006099.1 | 30.00%      | 6.00E-31 | 452(1103-1554)                              | COG1357(COG1357,5.33e-05,169,286-454)                                        | Peptidase_S74(PF13884,1.1E-8,1445-1502)                                                     |                                                                    |
|    |          |        |        |      | YapH protein                                     | Bdellovibrio bacteriovorus HD100         | NP_968058.1    | 37.00%      | 3.00E-07 | 101(1441-1541)                              |                                                                              |                                                                                             |                                                                    |
| 9  | 15,502   | 15,954 | 453    | 150  |                                                  |                                          |                |             |          |                                             |                                                                              | signal-peptide(SignalP-NN(euk),-1.0,1-16)                                                   |                                                                    |
| 10 | 16,194   | 16,856 | 663    | 220  |                                                  |                                          |                |             |          |                                             |                                                                              |                                                                                             |                                                                    |
| 11 | 16,856   | 17,419 | 564    | 187  | hypothetical protein                             | Pseudanabaena sp. PCC 6802               | WP_019500721   | 31.10%      | 1.43E-12 | 178(5-182)                                  | 2OG-FeII_Oxy_5(c117879,1.42e-20,94,89-182)                                   | TIGR02466: conserved hypothetical protein(TIGR02466,1.8E-21,4-183)                          |                                                                    |
|    |          |        |        |      | hypothetical protein CYXG_00205                  | Synechococcus phage S-SSM4               | YP_007677394   | 31.10%      | 3.80E-11 | 127(57-183)                                 |                                                                              |                                                                                             |                                                                    |
| 12 | 17,420   | 17,731 | 312    | 103  |                                                  |                                          |                |             |          |                                             |                                                                              |                                                                                             |                                                                    |
| 13 | 17,685   | 18,758 | 1074   | 357  | 2OG-Fe(II) oxygenase                             | Prochlorococcus phage P-RSM4             | YP_004323166   | 34.70%      | 1.67E-21 | 175(7-181)                                  | 2OG-FeII_Oxy_3 super family(c117304,1.10e-07,157,23-179;3.28e-04,81,256-336) | 2OG-FeII_Oxy_3(PF13640,7.2E-8,103-179;3.8E-6,256-334)                                       |                                                                    |
|    |          |        |        |      | prolyl 4-hydroxylase subunit alpha               | Candidatus Solibacter usitatus Ellin6076 | YP_827606      | 34.00%      | 7.11E-06 | 101(252-352)                                |                                                                              |                                                                                             |                                                                    |

| ID | Position |        | Length |     | BlastP hit in GenBank nr and/or viruses data set            |                                                 |              |             |          |                                             | NCBI conserved domain (ID, E-value, alignment length in aa, alignment start - end position) | Interproscan matches (ID, E-value, alignment start - end position) |                                                                      |  |
|----|----------|--------|--------|-----|-------------------------------------------------------------|-------------------------------------------------|--------------|-------------|----------|---------------------------------------------|---------------------------------------------------------------------------------------------|--------------------------------------------------------------------|----------------------------------------------------------------------|--|
|    | start    | end    | nt     | aa  | ORF, protein encoded, or mass                               | Species                                         | Accession    | Aa identity | E Value  | Alignment length in aa (Start-end position) |                                                                                             |                                                                    |                                                                      |  |
| 14 | 18,786   | 19,643 | 858    | 285 |                                                             | Verrucomicrobia                                 |              |             |          |                                             |                                                                                             |                                                                    |                                                                      |  |
|    |          |        | 1155   | 384 | hypothetical protein                                        | bacterium SCGC AAA164-P11                       | WP_020036727 | 40.60%      | 2.91E-32 | 173(212-384)                                | 2OG-FeII_Oxy_3(c117304,9.81e-14,87,292-378)                                                 | 2OG-FeII_Oxy_3(PF13640,4.1E-9,301-378)                             |                                                                      |  |
| 15 | 19,574   | 20,728 |        |     |                                                             |                                                 |              |             |          |                                             |                                                                                             |                                                                    | Prolyl 4-hydroxylase alpha subunit homologue(SM00702,7.9E-5,209-379) |  |
| 16 | 20,670   | 21,674 | 1005   | 334 | transcription factor jumonji jmjC domain-containing protein | Chroococciopsis thermalis PCC 7203              | YP_007094572 | 44.10%      | 5.86E-04 | 57(12-68)                                   | Cupin_8 super family(c118657,4.91e-08,45,24-68)                                             | Cupin_8 ( PF13621,2.1E-9,20-68;1.5E-9,156-206)                     |                                                                      |  |
|    |          |        | 579    | 192 | prolyl 4-hydroxylase                                        | Synechococcus phage S-CAM1                      | YP_007672989 | 43.10%      | 2.69E-39 | 182(1-182)                                  |                                                                                             | 2OG-FeII_Oxy_3(PF13640,2.8E-7,92-180)                              |                                                                      |  |
| 17 | 21,680   | 22,258 |        |     | hypothetical protein EMIHURAFT_455045                       | Emiliana huxleyi CCMP1516                       | EOD36489     | 40.30%      | 6.63E-39 | 180(3-182)                                  | 2OG-FeII_Oxy_3 Superfamily(c117304,1.62e-10,169,12-180)                                     | PROLYL 4-HYDROXYLASE ALPHA SUBUNIT(PTHR10869,1.1E-6,90-155)        |                                                                      |  |
| 18 | 22,273   | 23,304 | 1032   | 343 | hypothetical protein ATCVOR07043_989R                       | Acanthocystis turfacea Chlorella virus OR0704.3 | AGE59592     | 26.70%      | 1.64E-06 | 205(1-205)                                  |                                                                                             | transmembrane_regions(tmhmm,-1.0,303-323)                          |                                                                      |  |
| 19 | 23,349   | 23,630 | 282    | 93  | hypothetical protein MPXG_00025                             | Micromonas pusilla virus SP1                    | AET84823     | 58.10%      | 3.04E-18 | 86(8-93)                                    |                                                                                             |                                                                    |                                                                      |  |

| ID | Position |        | Length |      | BlastP hit in GenBank nr and/or viruses data set |                                   |                      |             |          |                                             | NCBI conserved domain (ID, E-value, alignment length in aa, alignment start - end position) | Interproscan matches (ID, E-value, alignment start - end position)                   |
|----|----------|--------|--------|------|--------------------------------------------------|-----------------------------------|----------------------|-------------|----------|---------------------------------------------|---------------------------------------------------------------------------------------------|--------------------------------------------------------------------------------------|
|    | start    | end    | nt     | aa   | ORF, protein encoded, or mass                    | Species                           | Accession            | Aa identity | E Value  | Alignment length in aa (Start-end position) |                                                                                             |                                                                                      |
|    |          |        |        |      | hypothetical protein                             | Verrucomicrobia<br>bacterium      | SCGC<br>WP_020036346 | 59.80%      | 5.36E-16 | 92(2-93)                                    |                                                                                             | transmembrane_regions(tmhmm,-1.0,15-33;52-72)                                        |
| 20 | 23,634   | 23,801 | 168    | 55   |                                                  |                                   |                      |             |          |                                             |                                                                                             |                                                                                      |
|    |          |        | 492    | 163  |                                                  |                                   |                      |             |          |                                             |                                                                                             | signal-peptide(SignalP-NN(euk),-1.0,1-18)                                            |
| 21 | 23,810   | 24,301 |        |      |                                                  |                                   |                      |             |          |                                             |                                                                                             | transmembrane_regions(tmhmm,-1.0,75-95)                                              |
|    |          |        |        |      | hypothetical protein<br>OIV1_097                 | Ostreococcus<br>lucimarinus virus | YP_004061730         | 30.20%      | 1.83E-39 | 372(1-372)                                  | Capsid_NCLDV(pfam04451,2.86e-26,179,191-369)                                                | Capsid_NCLDV(PF04451,7.3E-26,191-369)                                                |
| 22 | 24,278   | 25,450 | 1173   | 390  | hypothetical protein                             | Verrucomicrobia<br>bacterium      | SCGC<br>WP_020036343 | 29.10%      | 1.30E-29 | 369(1-369)                                  |                                                                                             | Group II dsDNA viruses<br>VP(SSF49749,8.2E-22,206-377;1.9E-17,402-5761.7E-21,24-152) |
|    |          |        |        |      |                                                  |                                   |                      |             |          |                                             |                                                                                             | African swine fever virus(2.70.9.20,9.1E-25,212-368)                                 |
| 23 | 25,523   | 29,176 | 3654   | 1217 | hypothetical protein<br>MPWG_00160               | Micromonas pusilla<br>virus PL1   | AET43647.1           | 32.00%      | 2.00E-46 | 312(905-1216)                               | Capsid_NCLDV(pfam04451,9.10e-26,178,1036-1213)                                              | Capsid_NCLDV(PF04451,8.3E-30,1033-1212)                                              |



| ID | Position |        | Length |     | BlastP hit in GenBank nr and/or viruses data set |                                                 |                    |             |           | NCBI conserved domain (ID, E-value, alignment length in aa, alignment start - end position) | Interproscan matches (ID, E-value, alignment start - end position) |                                                                                         |
|----|----------|--------|--------|-----|--------------------------------------------------|-------------------------------------------------|--------------------|-------------|-----------|---------------------------------------------------------------------------------------------|--------------------------------------------------------------------|-----------------------------------------------------------------------------------------|
|    | start    | end    | nt     | aa  | ORF, protein encoded, or mass                    | Species                                         | Accession          | Aa identity | E Value   |                                                                                             |                                                                    | Alignment length in aa (Start-end position)                                             |
|    |          |        |        |     | hypothetical protein                             | Verrucomicrobia<br>bacterium SCGC<br>AAA164-N20 | WP_020036344.<br>1 | 28.00%      | 5.00E-33  | 298(920-1217)                                                                               |                                                                    | Group II dsDNA viruses<br>VP(SSF49749,1.0E-23,1057-1216;1.5E-20,916-1056;2.6E-6,93-164) |
|    |          |        |        |     |                                                  |                                                 |                    |             |           |                                                                                             |                                                                    | African swine fever virus(2.70.9.20,7.1E-30,1060-1216)                                  |
|    |          |        |        |     |                                                  |                                                 |                    |             |           |                                                                                             |                                                                    | signal-peptide(SignalP-NN(euk),-1.0,1-44)                                               |
|    |          |        |        |     |                                                  |                                                 |                    |             |           |                                                                                             |                                                                    | transmembrane_regions(tmhmm,-1.0,28-46)                                                 |
| 24 | 29,049   | 29,843 | 795    | 264 | hypothetical protein<br>MPWG_00162               | Micromonas pusilla<br>virus PL1                 | AET43649           | 65.40%      | 7.62E-121 | 240(1-240)                                                                                  | AAA(smarts00382,3.30e-05,142,17-158)                               | P-loop containing nucleoside triphosphate hydrolases(SSF52540,6.4E-9,5-189)             |
|    |          |        |        |     | hypothetical protein                             | Verrucomicrobia<br>bacterium SCGC<br>AAA164-N20 | WP_020036342       | 57.70%      | 6.00E-115 | 262(1-262)                                                                                  |                                                                    |                                                                                         |
| 25 | 29,876   | 30,364 | 489    | 162 | hypothetical protein<br>BpV1_077c                | Bathycoccus sp.<br>RCC1105 virus<br>BpV1        | YP_004061507       | 40.30%      | 1.72E-16  | 128(31-158)                                                                                 |                                                                    | transmembrane_regions(tmhmm,-1.0,137-155)                                               |

| ID | Position |        | Length |     | BlastP hit in GenBank nr and/or viruses data set |                                  |              |             |          |                                             | NCBI conserved domain (ID, E-value, alignment length in aa, alignment start - end position) | Interproscan matches (ID, E-value, alignment start - end position)            |                                        |  |
|----|----------|--------|--------|-----|--------------------------------------------------|----------------------------------|--------------|-------------|----------|---------------------------------------------|---------------------------------------------------------------------------------------------|-------------------------------------------------------------------------------|----------------------------------------|--|
|    | start    | end    | nt     | aa  | ORF, protein encoded, or mass                    | Species                          | Accession    | Aa identity | E Value  | Alignment length in aa (Start-end position) |                                                                                             |                                                                               |                                        |  |
| 26 | 30,370   | 30,819 | 450    | 149 | hypothetical protein MPXG_00018                  | Micromonas pusilla virus SP1     | AET84816     | 37.90%      | 9.57E-26 | 142(4-145)                                  |                                                                                             | WLM(PF08325,3.6E-8,60-136)                                                    |                                        |  |
|    |          |        |        |     |                                                  | Verrucomicrobia                  |              |             |          |                                             |                                                                                             |                                                                               |                                        |  |
|    |          |        |        |     | hypothetical protein                             | bacterium SCGC                   | WP_020036273 | 35.40%      | 8.26E-22 | 124(22-145)                                 | WLM super family(cl07077,8.81e-07,51,70-120)                                                | signal-peptide(SignalP-NN(euk),-1.0,1-15)                                     |                                        |  |
| 27 | 30,825   | 31,706 | 882    | 293 | hypothetical protein OtV6_088                    | Ostreococcus tauri virus RT-2011 | AFC34996     | 43.60%      | 2.66E-50 | 220(72-291)                                 |                                                                                             | Methyltransf_31(PF13847,4.0E-14,92-202)                                       |                                        |  |
|    |          |        |        |     | hypothetical protein                             | bacterium SCGC                   | WP_020036272 | 41.90%      | 6.91E-45 | 220(72-291)                                 | AdoMet_MTases(cd02440,4.55e-12,102,96-197)                                                  | S-adenosyl-L-methionine-dependent methyltransferases(SSF53335,9.3E-24,70-292) |                                        |  |
| 28 | 31,580   | 32,197 | 618    | 205 | hypothetical protein H665_p085                   | Ostreococcus tauri virus 1       | YP_003212908 | 69.20%      | 3.18E-70 | 182(3-184)                                  |                                                                                             |                                                                               |                                        |  |
|    |          |        |        |     | hypothetical protein                             | bacterium SCGC                   | WP_020036266 | 67.00%      | 5.63E-65 | 176(1-176)                                  |                                                                                             |                                                                               |                                        |  |
| 29 | 32,262   | 32,546 | 285    | 94  |                                                  |                                  |              |             |          |                                             |                                                                                             | signal-peptide(SignalP-NN(euk),-1.0,1-24)                                     |                                        |  |
|    |          |        |        |     |                                                  |                                  |              |             |          |                                             |                                                                                             |                                                                               | transmembrane_regions(tmhmm,-1.0,4-19) |  |
| 30 | 33,012   | 33,470 | 459    | 152 | hypothetical protein MPVG_00145                  | Micromonas pusilla virus 12T     | YP_007676210 | 27.00%      | 3.37E-06 | 100(31-130)                                 |                                                                                             | signal-peptide(SignalP-NN(euk),-1.0,1-24)                                     |                                        |  |

| ID | Position |        | Length |     | BlastP hit in GenBank nr and/or viruses data set |                                |              |             |          |                                             | NCBI conserved domain (ID, E-value, alignment length in aa, alignment start - end position) | Interproscan matches (ID, E-value, alignment start - end position)                |
|----|----------|--------|--------|-----|--------------------------------------------------|--------------------------------|--------------|-------------|----------|---------------------------------------------|---------------------------------------------------------------------------------------------|-----------------------------------------------------------------------------------|
|    | start    | end    | nt     | aa  | ORF, protein encoded, or mass                    | Species                        | Accession    | Aa identity | E Value  | Alignment length in aa (Start-end position) |                                                                                             |                                                                                   |
| 31 | 33,322   | 34,389 | 1068   | 355 | hypothetical protein MpV1_083                    | Micromonas sp. RCC1109 virus   | YP_004061966 | 32.70%      | 1.56E-51 | 331(12-342)                                 | Herpes_UL52 super family(c117300,9.87e-03,35,258-292)                                       | Herpes_UL52(PF03121,5.0E-8,251-294)                                               |
|    |          |        |        |     | hypothetical protein                             | Verrucomicrobia bacterium SCGC | WP_020036261 | 30.10%      | 1.59E-39 | 298(16-313)                                 | AAA164-N20                                                                                  |                                                                                   |
| 32 | 34,466   | 34,723 | 258    | 85  | hypothetical protein                             | Ostreococcus virus OsV5        | YP_001648161 | 46.70%      | 8.55E-47 | 181(5-185)                                  | Nudix_Hydrolase super family(c100447,1.92e-05,56,6-61)                                      | NUDIX(PS51462,9.104,5-169)                                                        |
| 33 | 34,742   | 35,302 | 561    | 186 | hypothetical protein                             | Verrucomicrobia bacterium SCGC | WP_020036259 | 43.20%      | 5.72E-40 | 181(5-185)                                  |                                                                                             |                                                                                   |
|    |          |        |        |     | hypothetical protein OIV1_076                    | Ostreococcus lucimarinus virus | YP_004061709 | 56.80%      | 4.09E-52 | 175(1-175)                                  | Capsid_NCLDV(pfam04451,5.88e-22,189,384-572)                                                | Capsid_NCLDV(PF04451,1.3E-23,382-571)                                             |
| 34 | 35,452   | 37,182 | 1731   | 576 | hypothetical protein                             | Verrucomicrobia bacterium SCGC | WP_020036256 | 54.50%      | 1.91E-50 | 177(1-177)                                  |                                                                                             | Group II dsDNA viruses VP(SSF49749,4.2E-29,25-176;1.9E-17,402-576;0.0041,380-401) |
|    |          |        |        |     | hypothetical protein                             | Verrucomicrobia bacterium SCGC | WP_020036256 | 54.50%      | 1.91E-50 | 177(1-177)                                  |                                                                                             | African swine fever virus(2.70.9.20,1.1E-21,403-576)                              |

| ID | Position |        | Length |     | BlastP hit in GenBank nr and/or viruses data set |                                      |              |             |          |                                             | NCBI conserved domain (ID, E-value, alignment length in aa, alignment start - end position) | Interproscan matches (ID, E-value, alignment start - end position) |
|----|----------|--------|--------|-----|--------------------------------------------------|--------------------------------------|--------------|-------------|----------|---------------------------------------------|---------------------------------------------------------------------------------------------|--------------------------------------------------------------------|
|    | start    | end    | nt     | aa  | ORF, protein encoded, or mass                    | Species                              | Accession    | Aa identity | E Value  | Alignment length in aa (Start-end position) |                                                                                             |                                                                    |
| 35 | 37,234   | 38,313 | 1080   | 359 | hypothetical protein OIV1_102c                   | Ostreococcus lucimarinus virus       | YP_004061735 | 32.00%      | 6.68E-38 | 348(2-349)                                  | signal-peptide(SignalP-NN(euk),-1.0,1-20)                                                   |                                                                    |
|    |          |        |        |     |                                                  | Verrucomicrobia OIV1                 |              |             |          |                                             |                                                                                             |                                                                    |
| 36 | 38,390   | 38,662 | 273    | 90  | hypothetical protein                             | bacterium SCGC                       | WP_020036348 | 30.60%      | 1.68E-27 | 346(8-353)                                  |                                                                                             |                                                                    |
|    |          |        |        |     |                                                  | AAA164-N20                           |              |             |          |                                             |                                                                                             |                                                                    |
| 37 | 38,693   | 39,310 | 618    | 205 | hypothetical protein MPVG_00127                  | Micromonas pusilla virus 12T         | YP_007676193 | 39.90%      | 1.51E-39 | 176(2-177)                                  | transmembrane_regions(tmhmm,-1.0,50-65)                                                     |                                                                    |
|    |          |        |        |     |                                                  | Verrucomicrobia                      |              |             |          |                                             |                                                                                             |                                                                    |
| 38 | 39,338   | 39,826 | 489    | 162 | hypothetical protein BpV1_089c                   | Bathycoccus sp. RCC1105 virus        | YP_004061519 | 35.00%      | 5.48E-18 | 150(2-151)                                  |                                                                                             |                                                                    |
|    |          |        |        |     |                                                  | Verrucomicrobia BpV1                 |              |             |          |                                             |                                                                                             |                                                                    |
| 39 | 40,142   | 40,939 | 798    | 265 | hypothetical protein BpV1_091c                   | bacterium SCGC                       | WP_020036351 | 35.00%      | 5.89E-18 | 150(2-151)                                  |                                                                                             |                                                                    |
|    |          |        |        |     |                                                  | AAA164-N20                           |              |             |          |                                             |                                                                                             |                                                                    |
| 40 | 40,890   | 41,147 | 258    | 85  | hypothetical protein PBCVKS1B_593L               | Bathycoccus sp. RCC1105 virus        | YP_004061521 | 36.40%      | 5.27E-30 | 208(1-208)                                  |                                                                                             |                                                                    |
|    |          |        |        |     |                                                  | Paramecium bursaria Chlorella        | AGE54713     | 53.80%      | 2.87E-06 | 50(12-61)                                   |                                                                                             |                                                                    |
| 41 | 41,144   | 41,515 | 372    | 123 | hypothetical protein Dalk_3573                   | Desulfatibacillum alkenivorans AK-01 | YP_002432729 | 40.00%      | 2.89E-02 | 50(13-62)                                   |                                                                                             |                                                                    |
|    |          |        |        |     |                                                  | Ostreococcus lucimarinus virus       | AFK66157     | 47.20%      | 2.33E-25 | 123(1-123)                                  |                                                                                             |                                                                    |

| ID | Position |        | Length |     | BlastP hit in GenBank nr and/or viruses data set |                               |              |             |          | NCBI conserved domain (ID, E-value, alignment length in aa, alignment start - end position) | Interproscan matches (ID, E-value, alignment start - end position) |                                                                                    |
|----|----------|--------|--------|-----|--------------------------------------------------|-------------------------------|--------------|-------------|----------|---------------------------------------------------------------------------------------------|--------------------------------------------------------------------|------------------------------------------------------------------------------------|
|    | start    | end    | nt     | aa  | ORF, protein encoded, or mass                    | Species                       | Accession    | Aa identity | E Value  |                                                                                             |                                                                    | Alignment length in aa (Start-end position)                                        |
|    |          |        |        |     |                                                  | Verrucomicrobia               |              |             |          |                                                                                             |                                                                    |                                                                                    |
| 42 | 41,522   | 42,190 | 669    | 222 | hypothetical protein                             | bacterium SCGC                | WP_020036584 | 33.60%      | 7.85E-17 | 122(1-122)                                                                                  |                                                                    | signal-peptide(SignalP-NN(euk),-1.0,1-24)<br>transmembrane_regions(tmhm,-1.0,5-25) |
|    |          |        |        |     |                                                  | Verrucomicrobia               |              |             |          |                                                                                             |                                                                    |                                                                                    |
| 43 | 42,267   | 42,668 | 402    | 133 | hypothetical protein BpV2_094                    | Bathycoccus sp. RCC1105 virus | ADQ91261     | 39.00%      | 1.55E-28 | 129(1-129)                                                                                  |                                                                    |                                                                                    |
|    |          |        |        |     |                                                  | Verrucomicrobia               |              |             |          |                                                                                             |                                                                    |                                                                                    |
|    |          |        |        |     | hypothetical protein                             | bacterium SCGC                | WP_020036355 | 36.80%      | 1.71E-25 | 129(1-129)                                                                                  |                                                                    |                                                                                    |
|    |          |        |        |     |                                                  | Ostreococcus                  |              |             |          |                                                                                             |                                                                    |                                                                                    |
| 44 | 42,695   | 43,438 | 744    | 247 | hypothetical protein OIV1_111                    | lucimarinus virus             | YP_004061744 | 52.60%      | 1.07E-81 | 246(1-246)                                                                                  | PCNA(c109515,4.85e-47,242,4-245)                                   | pcna: proliferating cell nuclear antigen (pcna) (TIGR00590, 2.8E-51, 3-246)        |
|    |          |        |        |     |                                                  | Verrucomicrobia               |              |             |          |                                                                                             |                                                                    |                                                                                    |
|    |          |        |        |     | hypothetical protein                             | bacterium SCGC                | WP_020036354 | 53.30%      | 5.40E-81 | 246(1-246)                                                                                  |                                                                    |                                                                                    |
|    |          |        |        |     |                                                  | Ostreococcus                  |              |             |          |                                                                                             |                                                                    |                                                                                    |
| 45 | 43,465   | 44,376 | 912    | 303 | hypothetical protein OMVG_00153                  | lucimarinus virus             | AFK66153     | 51.50%      | 1.26E-89 | 293(11-303)                                                                                 | Pox_VLTF3(pfam04947,7.98e-56,174,129-302)                          | Pox_VLTF3(PF04947,3.6E-53,131-301)                                                 |
|    |          |        |        |     |                                                  | Bathycoccus sp.               |              |             |          |                                                                                             |                                                                    |                                                                                    |
|    |          |        |        |     | hypothetical protein BpV1_099c                   | RCC1105 virus                 | YP_004061529 | 54.00%      | 6.50E-35 | 112(4-115)                                                                                  | PDDEXK_3(c116254,5.04e-26,99,11-109)                               | PDDEXK_3(PF13366,4.2E-34,5-106)                                                    |
| 46 | 44,588   | 44,938 | 351    | 116 |                                                  | BpV1 candidate division       |              |             |          |                                                                                             |                                                                    |                                                                                    |
|    |          |        |        |     | hypothetical protein                             | DUSEL4 archaeon               | WP_018203135 | 38.40%      | 2.07E-20 | 108(1-108)                                                                                  |                                                                    |                                                                                    |
|    |          |        |        |     |                                                  | SCGC AAA011-                  |              |             |          |                                                                                             |                                                                    |                                                                                    |

| ID | Position |        | Length |     | BlastP hit in GenBank nr and/or viruses data set   |                                     |              |             |          |                                             | NCBI conserved domain (ID, E-value, alignment length in aa, alignment start - end position) | Interproscan matches (ID, E-value, alignment start - end position) |
|----|----------|--------|--------|-----|----------------------------------------------------|-------------------------------------|--------------|-------------|----------|---------------------------------------------|---------------------------------------------------------------------------------------------|--------------------------------------------------------------------|
|    | start    | end    | nt     | aa  | ORF, protein encoded, or mass                      | Species                             | Accession    | Aa identity | E Value  | Alignment length in aa (Start-end position) |                                                                                             |                                                                    |
|    |          |        |        |     |                                                    | L22                                 |              |             |          |                                             |                                                                                             |                                                                    |
| 47 | 44,972   | 45,370 | 399    | 132 | hypothetical protein OtV6_119c                     | Ostreococcus tauri virus RT-2011    | AFC35027     | 40.70%      | 5.58E-07 | 79(51-129)                                  |                                                                                             |                                                                    |
| 48 | 45,480   | 46,274 | 795    | 264 | hypothetical protein MPXG_00049                    | Micromonas pusilla virus SP1        | AET84847     | 38.10%      | 2.26E-48 | 257(1-257)                                  | Patatin_and_cPLA2(cl11396,3.12e-14,131,53-183)                                              | FabD/lysophospholipase-like(SSF52151,6.3E-21,1-198)                |
|    |          |        |        |     | Patatin                                            | Pelosinus                           | WP_007935048 | 30.90%      | 8.42E-12 | 177(7-183)                                  |                                                                                             | Patatin(PF01734,5.5E-14,6-183)                                     |
|    |          |        |        |     | hypothetical protein OMVG_00142                    | Ostreococcus lucimarinus virus OIV3 | AFK66142     | 53.40%      | 4.39E-20 | 126(1-126)                                  |                                                                                             | signal-peptide(SignalP-NN(euk),-1.0,1-58)                          |
| 49 | 46,382   | 46,762 | 381    | 126 | hypothetical protein PRUPE_ppa026813mg             | Prunus persica                      | EMJ18658     | 34.40%      | 1.90E-04 | 109(10-118)                                 |                                                                                             | transmembrane_regions(tmhmm,-1.0,10-28;42-62;72-94;100-118)        |
| 50 | 46,769   | 47,128 | 360    | 119 | hypothetical protein OIV1_155                      | Ostreococcus lucimarinus virus OIV1 | YP_004061788 | 40.70%      | 4.39E-14 | 113(6-118)                                  |                                                                                             |                                                                    |
| 51 | 47,219   | 47,587 | 369    | 122 | PREDICTED: uncharacterized protein C6orf72 homolog | Saimiri boliviensis boliviensis     | XP_003943628 | 29.00%      | 2.85E-02 | 65(23-87)                                   |                                                                                             |                                                                    |
| 52 | 47,644   | 48,117 | 474    | 157 | hypothetical protein MpV1_129c                     | Micromonas sp. RCC1109 virus MpV1   | YP_004062012 | 43.80%      | 4.10E-24 | 145(4-148)                                  |                                                                                             | signal-peptide(SignalP-NN(euk),-1.0,1-26)                          |

| ID | Position |        | Length |     | BlastP hit in GenBank nr and/or viruses data set |                                     |              |             |          | NCBI conserved domain (ID, E-value, alignment length in aa, alignment start - end position) | Interproscan matches (ID, E-value, alignment start - end position) |                                                             |
|----|----------|--------|--------|-----|--------------------------------------------------|-------------------------------------|--------------|-------------|----------|---------------------------------------------------------------------------------------------|--------------------------------------------------------------------|-------------------------------------------------------------|
|    | start    | end    | nt     | aa  | ORF, protein encoded, or mass                    | Species                             | Accession    | Aa identity | E Value  |                                                                                             |                                                                    | Alignment length in aa (Start-end position)                 |
|    |          |        |        |     | hypothetical protein                             | Marine Group II euryarchaeote       | WP_018035657 | 32.60%      | 1.03E-05 | 127(28-154)                                                                                 |                                                                    | transmembrane_regions(tmhmm,-1.0,5-25)                      |
| 53 | 48,150   | 48,701 | 552    | 183 | hypothetical protein OLOG_00166                  | Ostreococcus lucimarinus virus OIV4 | AET84626     | 37.40%      | 5.06E-25 | 174(1-174)                                                                                  |                                                                    |                                                             |
| 54 | 48,737   | 49,132 | 396    | 131 | hypothetical protein MPXG_00056                  | Micromonas pusilla virus SP1        | AET84854     | 53.80%      | 1.51E-32 | 142(13-154)                                                                                 | SWIB super family(cl02489,1.82e-07,76,76-151)                      | SWIB/MDM2 domain(SSF47592,2.1E-13,65-153)                   |
| 55 | 49,078   | 49,650 | 573    | 190 | hypothetical protein                             | Bacteria                            | WP_018003588 | 28.90%      | 4.27E-06 | 131(23-153)                                                                                 |                                                                    | BRG-1 ASSOCIATED FACTOR 60 (BAF60)(PTHR13844,8.1E-6,63-155) |
|    |          |        |        |     | hypothetical protein OtV6_130                    | Ostreococcus tauri virus RT-2011    | AFC35038     | 60.50%      | 2.24E-88 | 210(14-223)                                                                                 | RNaseIII(TIGR02191,5.70e-66,215,19-233)                            | RNase_III(MF_00104,23.898,14-222)                           |
| 56 | 49,682   | 50,485 | 804    | 267 |                                                  |                                     |              |             |          |                                                                                             |                                                                    | dsrm(PF00035,3.1E-12,163-223)                               |
|    |          |        |        |     |                                                  |                                     |              |             |          |                                                                                             |                                                                    | RNase III domain-like(SSF69065,9.9E-40,1-169)               |
| 57 | 50,388   | 51,119 | 732    | 243 | hypothetical protein OIV1_148c                   | Ostreococcus lucimarinus virus OIV1 | YP_004061781 | 57.80%      | 1.73E-69 | 196(1-196)                                                                                  | YqaJ(cl09232,1.63e-34,124,20-143)                                  | Restriction endonuclease-like(SSF52980,1.0E-38,1-193)       |
|    |          |        |        |     |                                                  |                                     |              |             |          |                                                                                             |                                                                    | YqaJ(PF09588,9.7E-31,20-145)                                |

| ID | Position |        | Length |      | BlastP hit in GenBank nr and/or viruses data set |                                             |              |             |           |                                             | NCBI conserved domain (ID, E-value, alignment length in aa, alignment start - end position) | Interproscan matches (ID, E-value, alignment start - end position)     |
|----|----------|--------|--------|------|--------------------------------------------------|---------------------------------------------|--------------|-------------|-----------|---------------------------------------------|---------------------------------------------------------------------------------------------|------------------------------------------------------------------------|
|    | start    | end    | nt     | aa   | ORF, protein encoded, or mass                    | Species                                     | Accession    | Aa identity | E Value   | Alignment length in aa (Start-end position) |                                                                                             |                                                                        |
| 58 | 51,046   | 51,240 | 195    | 64   |                                                  |                                             |              |             |           |                                             |                                                                                             | ZF_BBOX (PS50119, 9.058, 1-33)                                         |
| 59 | 51,237   | 51,686 | 450    | 149  |                                                  |                                             |              |             |           |                                             |                                                                                             | signal-peptide(SignalP-NN(euk),-1.0,125-139)                           |
| 60 | 51,686   | 52,006 | 321    | 106  | hypothetical protein OtV6_138                    | Ostreococcus tauri virus RT-2011            | AFC35046     | 68.40%      | 2.71E-41  | 98(1-98)                                    | NTP-PPase(c116941,1.52e-10,75,10-84)                                                        | all-alpha NTP pyrophosphatases (SSF101386,3.6E-15,1-97)                |
|    |          |        |        |      | hypothetical protein                             | Flexithrix dorotheae                        | WP_020533483 | 30.30%      | 1.38E-08  | 99(1-99)                                    |                                                                                             | signal-peptide(SignalP-NN(euk),-1.0,1-26)                              |
| 61 | 52,032   | 52,259 | 228    | 75   |                                                  |                                             |              |             |           |                                             |                                                                                             | transmembrane_regions(tmhmm,-1.0,9-29;48-66)                           |
| 62 | 52,317   | 52,700 | 384    | 127  | hypothetical protein OtV2_125                    | Ostreococcus tauri virus 2                  | YP_004063558 | 40.70%      | 1.53E-22  | 123(4-126)                                  |                                                                                             |                                                                        |
| 63 | 52,742   | 56,029 | 3288   | 1095 | hypothetical protein NY2A_B832R                  | Paramecium bursaria<br>Chlorella virus NY2A | YP_001498028 | 42.80%      | 0         | 1095(1-1095)                                | RNR_PFL(c109939,6.85e-119,263,147-409)                                                      | RIBONUCLEOSIDE-DIPHOSPHATE REDUCTASE LARGE CHAIN(PTHR11573,0.0,1-1072) |
|    |          |        |        |      | ribonucleoside-diphosphate reductase             | Gillisia sp.<br>CBA3202                     | WP_010231459 | 57.90%      | 2.16E-165 | 409(1-409)                                  | PLN02437(PLN02437,0,409,1-409)                                                              |                                                                        |





| ID | Position |        | Length |     | BlastP hit in GenBank nr and/or viruses data set |                                               |              |             |           | NCBI conserved domain (ID, E-value, alignment length in aa, alignment start - end position) | Interproscan matches (ID, E-value, alignment start - end position) |                                             |
|----|----------|--------|--------|-----|--------------------------------------------------|-----------------------------------------------|--------------|-------------|-----------|---------------------------------------------------------------------------------------------|--------------------------------------------------------------------|---------------------------------------------|
|    | start    | end    | nt     | aa  | ORF, protein encoded, or mass                    | Species                                       | Accession    | Aa identity | E Value   |                                                                                             |                                                                    | Alignment length in aa (Start-end position) |
| 70 | 58,500   | 58,970 | 471    | 156 | hypothetical protein                             | Acanthamoeba castellanii                      | AEQ60808     | 54.30%      | 4.52E-02  | 35(28-62)                                                                                   |                                                                    | signal-peptide(SignalP-NN(euk),-1.0,1-16)   |
| 71 | 58,938   | 59,327 | 390    | 129 |                                                  | mamavirus                                     |              |             |           |                                                                                             |                                                                    |                                             |
| 72 | 59,296   | 59,688 | 393    | 130 | hypothetical protein                             | Marine Group II euryarchaeote                 | WP_018035887 | 48.40%      | 6.55E-23  | 93(2-94)                                                                                    | HNHc(cd100083,1.10e-05,51,20-70)                                   | HNH nucleases(SM00507,0.0038,18-69)         |
| 72 |          |        |        |     | hypothetical protein                             | SCGC AB-629-J06 Cafeteria roenbergensis virus | YP_003970168 | 34.10%      | 1.40E-05  | 81(2-82)                                                                                    |                                                                    |                                             |
| 73 | 59,621   | 60,142 | 522    | 173 |                                                  | BV-PW1                                        |              |             |           |                                                                                             |                                                                    |                                             |
| 74 | 60,132   | 60,404 | 273    | 90  |                                                  |                                               |              |             |           |                                                                                             |                                                                    |                                             |
| 75 | 60,376   | 60,723 | 348    | 115 |                                                  |                                               |              |             |           |                                                                                             |                                                                    |                                             |
| 76 | 60,777   | 61,241 | 465    | 154 | hypothetical protein                             | Sporichthya polymorpha                        | WP_019874963 | 41.20%      | 9.36E-22  | 133(2-134)                                                                                  |                                                                    |                                             |
| 77 | 61,559   | 62,194 | 636    | 211 |                                                  |                                               |              |             |           |                                                                                             |                                                                    | transmembrane_regions(tmhmm,-1.0,21-41)     |
| 78 | 62,011   | 63,141 | 1131   | 376 | hypothetical protein                             | Micromonas pusilla virus PL1                  | AET43607     | 51.30%      | 1.31E-122 | 346(2-347)                                                                                  | DEXDc(cd00046,1.22e-16,133,28-160)                                 | SNF2_N(PF00176,1.6E-52,10-273)              |

| ID | Position |        | Length |     | BlastP hit in GenBank nr and/or viruses data set |                            |              |             |          |                                             | NCBI conserved domain (ID, E-value, alignment length in aa, alignment start - end position) | Interproscan matches (ID, E-value, alignment start - end position)                                                  |
|----|----------|--------|--------|-----|--------------------------------------------------|----------------------------|--------------|-------------|----------|---------------------------------------------|---------------------------------------------------------------------------------------------|---------------------------------------------------------------------------------------------------------------------|
|    | start    | end    | nt     | aa  | ORF, protein encoded, or mass                    | Species                    | Accession    | Aa identity | E Value  | Alignment length in aa (Start-end position) |                                                                                             |                                                                                                                     |
|    |          |        |        |     |                                                  |                            |              |             |          |                                             | HELICc(cd00079,1.83e-03,50,293-342)                                                         | SWI/SNF-RELATED MATRIX-ASSOCIATED ACTIN-DEPENDENT REGULATOR OF CHROMATIN SUBFAMILY-RELATED(PTHR10799,1.2E-69,9-341) |
| 79 | 63,222   | 65,579 | 2358   | 785 | hypothetical protein                             | Streptomyces sp. Amel2xE9  | WP_019984021 | 51.20%      | 1.56E-07 | 84(281-364)                                 |                                                                                             | DEAD-like helicases superfamily(SM00487,3.0E-24,2-192)                                                              |
| 80 | 65,588   | 66,382 | 795    | 264 | hypothetical protein H665_p140                   | Ostreococcus tauri virus 1 | YP_003212963 | 48.40%      | 1.81E-69 | 251(7-257)                                  | TBP_TLF(cI08263,1.52e-11,88,146-233)                                                        | TATA-box binding protein-like (SSF55945, 6.6E-13, 139-234)                                                          |
| 81 | 66,413   | 66,655 | 243    | 80  | hypothetical protein                             | Ruminococcus sp. JC304     | WP_019163451 | 36.10%      | 2.40E-05 | 86(148-233)                                 |                                                                                             |                                                                                                                     |

| ID | Position |        | Length |     | BlastP hit in GenBank nr and/or viruses data set                    |                                                   |              |             |          |                                             | NCBI conserved domain (ID, E-value, alignment length in aa, alignment start - end position) | Interproscan matches (ID, E-value, alignment start - end position)           |
|----|----------|--------|--------|-----|---------------------------------------------------------------------|---------------------------------------------------|--------------|-------------|----------|---------------------------------------------|---------------------------------------------------------------------------------------------|------------------------------------------------------------------------------|
|    | start    | end    | nt     | aa  | ORF, protein encoded, or mass                                       | Species                                           | Accession    | Aa identity | E Value  | Alignment length in aa (Start-end position) |                                                                                             |                                                                              |
| 82 | 66,731   | 67,381 | 651    | 216 | kinase protein                                                      | Acanthocystis turfacea<br>Chlorella virus Canal-1 | AGE50200     | 35.70%      | 2.63E-22 | 165(1-165)                                  | Tmk(COG0125,5.81e-15,179,2-180)                                                             | Deoxynucleoside kinase(PIRSF000705,1.6E-12,1-187)                            |
|    |          |        |        |     | Chain A, Crystal Structure Of Drosophila Deoxyribonucleoside Kinase | Drosophila melanogaster                           | IJ90_A       | 32.80%      | 3.50E-19 | 172(2-173)                                  |                                                                                             | P-loop containing nucleoside triphosphate hydrolases(SSF52540,5.4E-33,1-180) |
| 83 | 67,461   | 67,661 | 201    | 66  |                                                                     |                                                   |              |             |          |                                             |                                                                                             |                                                                              |
|    | 67,634   | 68,113 | 480    | 159 | hypothetical protein OtV6_143                                       | Ostreococcus tauri virus RT-2011                  | AFC35051     | 30.20%      | 5.42E-11 | 123(32-154)                                 | RING(cl17238,1.32e-07,49,32-80)                                                             | zf-RING_2(PF13639,1.1E-11,32-77)                                             |
| 84 |          |        |        |     | PREDICTED: RING finger protein 141-like                             | Bombus terrestris                                 | XP_003401476 | 35.50%      | 2.35E-09 | 62(19-80)                                   |                                                                                             | RING FINGER PROTEIN 38(PTHR14155:SF2,6.5E-9,32-99)                           |
| 85 | 68,119   | 69,024 | 906    | 301 | hypothetical protein BpV2_144c                                      | Bathycoccus sp. RCC1105 virus BpV2                | ADQ91311     | 38.70%      | 3.43E-49 | 250(47-296)                                 |                                                                                             |                                                                              |
|    |          |        |        |     | hypothetical protein VOLCADRAFT_119457                              | Volvox carteri f. nagariensis                     | XP_002956623 | 27.00%      | 1.37E-11 | 277(23-299)                                 |                                                                                             |                                                                              |
| 86 | 69,072   | 69,275 | 204    | 67  | hypothetical protein MpV1_149                                       | Micromonas sp. RCC1109 virus MpV1                 | YP_004062032 | 31.80%      | 1.71E-05 | 66(1-66)                                    |                                                                                             | signal-peptide(SignalP-NN(euk),-1.0,1-40)                                    |

| ID | Position |        | Length |     | BlastP hit in GenBank nr and/or viruses data set |                                         |              |             |          |                                             | NCBI conserved domain (ID, E-value, alignment length in aa, alignment start - end position) | Interproscan matches (ID, E-value, alignment start - end position) |
|----|----------|--------|--------|-----|--------------------------------------------------|-----------------------------------------|--------------|-------------|----------|---------------------------------------------|---------------------------------------------------------------------------------------------|--------------------------------------------------------------------|
|    | start    | end    | nt     | aa  | ORF, protein encoded, or mass                    | Species                                 | Accession    | Aa identity | E Value  | Alignment length in aa (Start-end position) |                                                                                             |                                                                    |
|    |          |        |        |     |                                                  |                                         |              |             |          |                                             |                                                                                             | transmembrane_regions(tmhmm,-1.0,15-35;45-65)                      |
| 87 | 69,321   | 69,614 | 294    | 97  | hypothetical protein H665_p144                   | Ostreococcus tauri virus 1              | YP_003212967 | 41.50%      | 5.33E-11 | 92(6-97)                                    | Thioredoxin_like(cl00388,5.66e-11,57,38-96)                                                 | Thioredoxin-like (SSF52833, 3.5E-11, 26-96)                        |
|    |          |        |        |     | glutaredoxin-like protein                        | Clostridium cellulovorans 743B          | YP_003845639 | 38.10%      | 1.03E-05 | 56(39-94)                                   |                                                                                             | Glutaredoxin (PF00462, 3.1E-7, 39-72)                              |
| 88 | 69,619   | 71,709 | 2091   | 696 | hypothetical protein MpV1_151c                   | Micromonas sp. RCC1109 virus MpV1       | YP_004062034 | 30.70%      | 5.51E-15 | 257(282-538)                                | PKc_like(cl09925,1.69e-07,187,194-380)                                                      | PROTEIN_KINASE_DOM ( PS50011 , 10.464, 188-506 )                   |
|    |          |        |        |     | hypothetical protein CAPTEDRAFT_105698           | Capitella teleta                        | ELU04274     | 41.80%      | 6.56E-03 | 67(304-370)                                 |                                                                                             |                                                                    |
| 89 | 71,728   | 72,408 | 681    | 226 | hypothetical protein MPXG_00075                  | Micromonas pusilla virus SP1            | AET84873     | 31.50%      | 3.41E-24 | 210(1-210)                                  |                                                                                             |                                                                    |
| 90 | 72,491   | 73,573 | 1083   | 360 | translation initiation factor IF-2               | Mycobacterium intracellulare ATCC 13950 | YP_005339067 | 48.90%      | 1.47E-02 | 41(85-125)                                  |                                                                                             |                                                                    |
| 91 | 73,597   | 73,887 | 291    | 96  | hypothetical protein OIV1_127c                   | Ostreococcus lucimarinus virus OIV1     | YP_004061760 | 46.40%      | 6.01E-09 | 56(4-59)                                    |                                                                                             | signal-peptide(SignalP-NN(euk),-1.0,1-16)                          |
|    |          |        |        |     |                                                  |                                         |              |             |          |                                             |                                                                                             | transmembrane_regions(tmhmm,-1.0,42-62)                            |





| ID  | Position |        | Length |     | BlastP hit in GenBank nr and/or viruses data set |         |                                        |              |         |                                             | NCBI conserved domain (ID, E-value, alignment length in aa, alignment start - end position) | Interproscan matches (ID, E-value, alignment start - end position) |                                         |
|-----|----------|--------|--------|-----|--------------------------------------------------|---------|----------------------------------------|--------------|---------|---------------------------------------------|---------------------------------------------------------------------------------------------|--------------------------------------------------------------------|-----------------------------------------|
|     | start    | end    | nt     | aa  | ORF, protein encoded, or mass                    | Species | Accession                              | Aa identity  | E Value | Alignment length in aa (Start-end position) |                                                                                             |                                                                    |                                         |
| 104 | 80,284   | 80,877 | 594    | 197 | conserved protein                                | unknown | Ectocarpus siliculosus                 | CBN79497     | 33.70%  | 4.94E-05                                    | 79(116-194)                                                                                 | zf-C3HC4_2(pfam13923,1.82e-06,41,146-186)                          | ZF_RING_2(PS50089,11.191,149-185)       |
| 105 | 81,061   | 81,423 | 363    | 120 |                                                  |         |                                        |              |         |                                             |                                                                                             | zf-C3HC4_3(PF13920,2.0E-10,146-190)                                |                                         |
| 106 | 81,446   | 81,643 | 198    | 65  |                                                  |         |                                        |              |         |                                             |                                                                                             | signal-peptide(SignalP-NN(euk),-1.0,1-25)                          |                                         |
| 107 | 81,648   | 81,974 | 327    | 108 | S-adenosylmethionine decarboxylase               |         | Symbiobacterium thermophilum IAM 14863 | YP_074250    | 41.50%  | 3.16E-14                                    | 93(13-105)                                                                                  | AdoMet_dc super family(c100687,1.25e-25,83,23-105)                 | AdoMet_dc(PF02675,3.4E-22,16-96)        |
| 108 | 81,984   | 82,403 | 420    | 139 |                                                  |         |                                        |              |         |                                             |                                                                                             |                                                                    |                                         |
| 109 | 82,404   | 82,808 | 405    | 134 |                                                  |         |                                        |              |         |                                             |                                                                                             | signal-peptide(SignalP-NN(euk),-1.0,1-38)                          |                                         |
| 110 | 82,948   | 84,351 | 1404   | 467 | hypothetical protein                             |         | Ostreococcus virus OsV5                | YP_001648266 | 63.10%  | 0                                           | 447(21-467)                                                                                 | Capsid_NCLDV(pfam04451,1.63e-59,242,222-463)                       | Capsid_NCLDV ( PF04451,1.6E-69,221-463) |



| ID  | Position |        | Length |     | BlastP hit in GenBank nr and/or viruses data set |                                 |              |             |          | NCBI conserved domain (ID, E-value, alignment length in aa, alignment start - end position) | Interproscan matches (ID, E-value, alignment start - end position) |                                                                                   |
|-----|----------|--------|--------|-----|--------------------------------------------------|---------------------------------|--------------|-------------|----------|---------------------------------------------------------------------------------------------|--------------------------------------------------------------------|-----------------------------------------------------------------------------------|
|     | start    | end    | nt     | aa  | ORF, protein encoded, or mass                    | Species                         | Accession    | Aa identity | E Value  |                                                                                             |                                                                    | Alignment length in aa (Start-end position)                                       |
|     |          |        |        |     |                                                  |                                 |              |             |          |                                                                                             |                                                                    | Group II dsDNA viruses<br>VP(SSF49749,2.8E-55,45-241;<br>2.4E-45,242-467)         |
|     |          |        |        |     |                                                  |                                 |              |             |          |                                                                                             |                                                                    | African swine fever virus, p72, major capsid(2.70.9.20,1.2E-63,244-467)           |
| 111 | 84,382   | 84,657 | 276    | 91  | hypothetical protein<br>MPWG_00084               | Micromonas pusilla<br>virus PL1 | AET43573     | 44.80%      | 1.01E-02 | 65(20-84)                                                                                   |                                                                    |                                                                                   |
|     | 84,686   | 86,623 | 1938   | 645 | hypothetical protein<br>MPVG_00067               | Micromonas pusilla<br>virus 12T | YP_007676135 | 50.60%      | 0        | 542(98-639)                                                                                 | COG3378(COG3378,1.64e-<br>09,157,369-525)                          | SF3_HELICASE_1(PS51206,11.757,331-<br>505)                                        |
| 112 |          |        |        |     |                                                  |                                 |              |             |          |                                                                                             |                                                                    | P-loop containing nucleoside triphosphate<br>hydrolases(SSF52540,3.9E-10,345-506) |
| 113 | 86,623   | 88,833 | 2211   | 736 |                                                  |                                 |              |             |          |                                                                                             |                                                                    |                                                                                   |
|     | 88,814   | 89,404 | 591    | 196 | hypothetical protein<br>OtV2_147                 | Ostreococcus tauri<br>virus 2   | YP_004063580 | 45.00%      | 1.72E-38 | 185(11-195)                                                                                 |                                                                    | mRNA_triPase(PF02940,1.2E-12,33-169)                                              |
| 114 |          |        |        |     |                                                  |                                 |              |             |          |                                                                                             | CYTH-like_Pase(c111964,8.97e-<br>09,123,70-192)                    | CYTH-like phosphatases(SSF55154,2.8E-<br>12,23-196)                               |

| ID  | Position |        | Length |     | BlastP hit in GenBank nr and/or viruses data set |                                   |              |             |           |                                             | NCBI conserved domain (ID, E-value, alignment length in aa, alignment start - end position) | Interproscan matches (ID, E-value, alignment start - end position)      |
|-----|----------|--------|--------|-----|--------------------------------------------------|-----------------------------------|--------------|-------------|-----------|---------------------------------------------|---------------------------------------------------------------------------------------------|-------------------------------------------------------------------------|
|     | start    | end    | nt     | aa  | ORF, protein encoded, or mass                    | Species                           | Accession    | Aa identity | E Value   | Alignment length in aa (Start-end position) |                                                                                             |                                                                         |
| 115 | 89,202   | 90,218 | 1017   | 338 | hypothetical protein OtV6_162c                   | Ostreococcus tauri virus RT-2011  | AFC35070     | 38.00%      | 2.40E-54  | 261(75-335)                                 | UCH(pfam00443,4.60e-24,244,81-324)                                                          | UCH_2_3(PS50235,17.907,81-338)                                          |
|     |          |        |        |     | ubiquitin carboxyl-terminal hydrolase 12         | Arthroderma otae CBS 113480       | XP_002846325 | 34.80%      | 3.88E-13  | 105(77-181)                                 |                                                                                             | Cysteine proteinases(SSF54001,2.2E-40,77-337)                           |
| 116 | 90,232   | 90,750 | 519    | 172 |                                                  |                                   |              |             |           |                                             |                                                                                             |                                                                         |
| 117 | 90,756   | 91,634 | 879    | 292 | hypothetical protein MpV1_160                    | Micromonas sp. RCC1109 virus MpV1 | YP_004062043 | 40.20%      | 4.88E-57  | 273(17-289)                                 | Adenylation_DNA_ligase_like(c12015,8.29e-47,187,15-201)                                     | MRNA-CAPPING ENZYME(PTHR10367,3.7E-33,24-288)                           |
| 118 | 91,702   | 92,337 | 636    | 211 | hypothetical protein MpV1_159                    | Micromonas sp. RCC1109 virus MpV1 | YP_004062042 | 35.80%      | 2.83E-37  | 210(1-210)                                  |                                                                                             |                                                                         |
| 119 | 92,365   | 93,120 | 756    | 251 | hypothetical protein MpV1_158                    | Micromonas sp. RCC1109 virus MpV1 | YP_004062041 | 64.70%      | 5.78E-118 | 238(6-243)                                  |                                                                                             | Nucleotide-diphospho-sugar transferases (SSF53448, 2.3E-10, 1-233)      |
| 120 | 93,148   | 94,125 | 978    | 325 | hypothetical protein OtV6_158                    | Ostreococcus tauri virus RT-2011  | AFC35066     | 39.80%      | 8.08E-68  | 319(7-325)                                  | SUA7(COG1405,5.82e-24,278,32-309)                                                           | TRANSCRIPTION INITIATION FACTOR IIB-RELATED (PTHR11618, 2.9E-33, 8-316) |
|     |          |        |        |     | transcription initiation factor IIB              | Archaeoglobus fulgidus DSM 4304   | NP_070128    | 28.20%      | 1.20E-21  | 290(24-313)                                 |                                                                                             |                                                                         |
| 121 | 94,189   | 94,479 | 291    | 96  |                                                  |                                   |              |             |           |                                             |                                                                                             | transmembrane_regions(tmhmm,-1.0,25-                                    |

| ID  | Position |        | Length |     | BlastP hit in GenBank nr and/or viruses data set |                                           |              |             |          |                                             | NCBI conserved domain (ID, E-value, alignment length in aa, alignment start - end position) | Interproscan matches (ID, E-value, alignment start - end position)                   |
|-----|----------|--------|--------|-----|--------------------------------------------------|-------------------------------------------|--------------|-------------|----------|---------------------------------------------|---------------------------------------------------------------------------------------------|--------------------------------------------------------------------------------------|
|     | start    | end    | nt     | aa  | ORF, protein encoded, or mass                    | Species                                   | Accession    | Aa identity | E Value  | Alignment length in aa (Start-end position) |                                                                                             |                                                                                      |
|     |          |        |        |     |                                                  |                                           |              |             |          |                                             |                                                                                             | 43)                                                                                  |
| 122 | 94,466   | 95,587 | 1122   | 373 | hypothetical protein MPWG_00064                  | Micromonas pusilla virus PL1              | AET43554     | 31.80%      | 8.38E-40 | 332(39-370)                                 | RFC1(pfam08519,1.68e-04,128,243-370)                                                        | DNA polymerase III clamp loader subunits, C-terminal domain(SSF48019,7.0E-6,223-314) |
|     |          |        |        |     | hypothetical protein VICG_01339                  | Vittaforma comeae ATCC 50505              | ELA41591     | 23.60%      | 3.67E-03 | 223(50-272)                                 |                                                                                             | signal-peptide(SignalP-NN(euk),-1.0,1-20)                                            |
| 123 | 95,672   | 95,977 | 306    | 101 | hypothetical protein PBCVMA1D_454L               | Paramecium bursaria Chlorella virus MA-1D | AGE54931     | 55.70%      | 2.78E-25 | 92(3-94)                                    |                                                                                             |                                                                                      |
| 124 | 96,308   | 96,907 | 600    | 199 |                                                  |                                           |              |             |          |                                             |                                                                                             |                                                                                      |
| 125 | 96,931   | 97,335 | 405    | 134 | putative phage N-6-adenine-methyltransferase     | Clostridium botulinum                     | WP_003385021 | 45.00%      | 8.94E-25 | 129(5-133)                                  | Dam(cl05442,7.87e-26,128,6-133)                                                             | Dam(PF05869,9.4E-27,6-133)                                                           |
| 126 | 97,387   | 97,641 | 255    | 84  |                                                  |                                           |              |             |          |                                             | Peptidase_M6(cl11525,6.60e-03,29,32-60)                                                     | transmembrane_regions(tmhmm,-1.0,19-39;54-76)                                        |
| 127 | 97,686   | 98,816 | 1131   | 376 | ornithine decarboxylase 1                        | Chlamydomonas reinhardtii                 | XP_001697502 | 44.80%      | 1.36E-99 | 362(7-368)                                  | LysA(COG0019,2.57e-73,340,20-359)                                                           | ARGININE/DIAMINOPIMELATE/ORNITHINE DECARBOXYLASE(PTHR11482,6.3E-119,18-359)          |
| 128 | 99,003   | 99,584 | 582    | 193 | hypothetical protein MpV1_184c                   | Micromonas sp. RCC1109 virus MpV1         | YP_004062067 | 43.30%      | 4.32E-43 | 178(11-188)                                 | Clp_protease_like(cl15763,2.99e-27,131,62-192)                                              | ClpP/crotonase(SSF52096,1.1E-33,3-193)                                               |

| ID  | Position |         | Length |     | BlastP hit in GenBank nr and/or viruses data set   |                                            |              |             |          |                                             | NCBI conserved domain (ID, E-value, alignment length in aa, alignment start - end position) | Interproscan matches (ID, E-value, alignment start - end position)           |
|-----|----------|---------|--------|-----|----------------------------------------------------|--------------------------------------------|--------------|-------------|----------|---------------------------------------------|---------------------------------------------------------------------------------------------|------------------------------------------------------------------------------|
|     | start    | end     | nt     | aa  | ORF, protein encoded, or mass                      | Species                                    | Accession    | Aa identity | E Value  | Alignment length in aa (Start-end position) |                                                                                             |                                                                              |
| 129 | 99,663   | 100,571 | 909    | 302 | ATP-dependent Clp protease, proteolytic subunit    | Phenylobacterium zucineum HLK1             | YP_002130657 | 35.30%      | 2.28E-17 | 134(60-193)                                 |                                                                                             |                                                                              |
|     |          |         |        |     | hypothetical protein FR483_N500R                   | Paramecium bursaria Chlorella virus FR483  | YP_001426132 | 34.40%      | 8.15E-41 | 238(65-302)                                 |                                                                                             |                                                                              |
|     |          |         |        |     | hypothetical protein SDRG_07749                    | Saprolegnia diclina VS20                   | EQC34951     | 31.80%      | 4.16E-37 | 291(11-301)                                 |                                                                                             |                                                                              |
| 130 | 100,596  | 100,823 | 228    | 75  |                                                    |                                            |              |             |          |                                             |                                                                                             | signal-peptide(SignalP-NN(euk),-1.0,1-21)                                    |
| 131 | 100,843  | 101,472 | 630    | 209 | hypothetical protein MpV1_231c                     | Micromonas sp. RCC1109 virus MpV1          | YP_004062114 | 53.40%      | 1.63E-71 | 202(4-205)                                  | PhoH(c117668,4.63e-86,202,4-205)                                                            | PhoH(PF02562,3.5E-70,3-205)                                                  |
|     |          |         |        |     | phosphate starvation protein PhoH                  | Verrucomicrobia bacterium SCGC AAA164-N20  | WP_020036220 | 48.80%      | 3.80E-65 | 202(4-205)                                  |                                                                                             | P-loop containing nucleoside triphosphate hydrolases(SSF52540,2.5E-30,2-185) |
| 132 | 101,526  | 101,900 | 375    | 124 |                                                    |                                            |              |             |          |                                             |                                                                                             | tolB(PRK04922,1.54e-03,56,44-99)                                             |
| 133 | 101,908  | 103,233 | 1326   | 441 | uncharacterized protein BN772_00442                | Bacteroides sp. CAG:754                    | CDA86821     | 27.30%      | 1.12E-06 | 148(39-186)                                 | HNHc(c100083,2.45e-05,54,378-431)                                                           | HNH(PF01844,4.4E-7,387-432)                                                  |
| 134 | 103,754  | 104,101 | 348    | 115 |                                                    |                                            |              |             |          |                                             |                                                                                             | transmembrane_regions(tmhmm,-1.0,33-53)                                      |
| 135 | 104,020  | 104,409 | 390    | 129 | PREDICTED: SCF ubiquitin ligase complex SKP1b-like | Glycine max                                | XP_003545933 | 34.50%      | 1.08E-09 | 102(26-127)                                 | SKP1(COG5201,1.29e-07,107,21-127)                                                           | SKP1(PTHR11165,2.6E-6,26-127)                                                |
|     |          |         |        |     | SKP1-like protein                                  | Paramecium bursaria Chlorella virus AP110A | AGE48994     | 30.80%      | 4.58E-09 | 104(24-127)                                 |                                                                                             |                                                                              |

| ID  | Position |         | Length |     | BlastP hit in GenBank nr and/or viruses data set  |                                   |              |             |           |                                             | NCBI conserved domain (ID, E-value, alignment length in aa, alignment start - end position) | Interproscan matches (ID, E-value, alignment start - end position)                        |  |
|-----|----------|---------|--------|-----|---------------------------------------------------|-----------------------------------|--------------|-------------|-----------|---------------------------------------------|---------------------------------------------------------------------------------------------|-------------------------------------------------------------------------------------------|--|
|     | start    | end     | nt     | aa  | ORF, protein encoded, or mass                     | Species                           | Accession    | Aa identity | E Value   | Alignment length in aa (Start-end position) |                                                                                             |                                                                                           |  |
| 136 | 104,535  | 104,768 | 234    | 77  |                                                   |                                   |              |             |           |                                             |                                                                                             |                                                                                           |  |
| 137 | 104,792  | 105,454 | 663    | 220 | pyrimidine nucleotidase                           | 5- Dacryopinax sp. DJM-731 SS1    | EJU06105     | 30.60%      | 9.58E-03  | 155(41-195)                                 | HAD_2(pfam13419,3.92e-04,6-186)                                                             | HAD-like(SSF56784,1.6E-6,1-206)                                                           |  |
| 138 | 105,484  | 105,723 | 240    | 79  |                                                   |                                   |              |             |           |                                             |                                                                                             | signal-peptide(SignalP-NN(euk),-1.0,1-39)<br>transmembrane_regions(tmhm,-1.0,19-37;52-72) |  |
| 139 | 105,763  | 106,197 | 435    | 144 | hypothetical protein H665_p199                    | Ostreococcus tauri virus 1        | YP_003213022 | 57.30%      | 5.98E-40  | 143(1-143)                                  | trimeric_dUTPase(c100493,5.62e-28,90,23-112)                                                | DEOXYURIDINE 5'-TRIPHOSPHATE NUCLEOTIDOHYDROLASE(PTHR11241,7.9E-56,1-144)                 |  |
| 140 | 106,235  | 106,627 | 393    | 130 | DUTP diphosphatase                                | Oxytricha trifallax               | EJY68335     | 47.90%      | 1.42E-36  | 142(3-144)                                  |                                                                                             | dUTPase(PF00692,6.4E-35,12-143)<br>signal-peptide(SignalP-NN(euk),-1.0,1-33)              |  |
| 141 | 106,665  | 109,589 | 2925   | 974 | hypothetical protein SXBG_00214                   | Synechococcus phage S-CAM1 alpha  | YP_007673127 | 41.20%      | 7.25E-83  | 446(513-958)                                |                                                                                             |                                                                                           |  |
| 142 | 109,609  | 110,340 | 732    | 243 | hypothetical protein                              | proteobacterium SCGC AAA076-E06   | WP_016579595 | 35.00%      | 7.64E-07  | 100(583-682)                                |                                                                                             |                                                                                           |  |
| 143 | 110,382  | 112,988 | 2607   | 868 | hypothetical protein MpV1_220                     | Micromonas sp. RCC1109 virus MpV1 | YP_004062103 | 54.60%      | 0         | 842(4-845)                                  | PolB(COG0417,3.37e-129,849,17-865)                                                          | pol2: DNA polymerase (pol2)(TIGR00592,1.7E-76,457-842)                                    |  |
|     |          |         |        |     | PREDICTED: DNA polymerase delta catalytic subunit | Vitis vinifera                    | XP_002264385 | 37.90%      | 3.30E-167 | 845(18-862)                                 | DnaQ_like_exo(c110012,2.40e-59,225,182-406)                                                 | DNA_pol_B_exo1(PF03104,3.6E-48,26-349)                                                    |  |

| ID  | Position |         | Length |      | BlastP hit in GenBank nr and/or viruses data set |                                    |            |             |          | NCBI conserved domain (ID, E-value, alignment length in aa, alignment start - end position) | Interproscan matches (ID, E-value, alignment start - end position)  |                                                              |
|-----|----------|---------|--------|------|--------------------------------------------------|------------------------------------|------------|-------------|----------|---------------------------------------------------------------------------------------------|---------------------------------------------------------------------|--------------------------------------------------------------|
|     | start    | end     | nt     | aa   | ORF, protein encoded, or mass                    | Species                            | Accession  | Aa identity | E Value  |                                                                                             |                                                                     | Alignment length in aa (Start-end position)                  |
|     |          |         |        |      |                                                  |                                    |            |             |          |                                                                                             | POLBc(c110023,3.19e-136,390,456-845)                                | DNA_pol_B(PF00136,9.5E-116,423-849)                          |
| 144 | 112,975  | 113,265 | 291    | 96   | unknown                                          | Zea mays                           | ACR34968   | 41.30%      | 1.09E-07 | 80(6-85)                                                                                    | Ion_trans_2(pfam07885,1.76e-05,41,43-83)                            |                                                              |
| 145 | 113,326  | 113,646 | 321    | 106  | hypothetical protein MPXG_00150                  | Micromonas pusilla virus SP1       | AET84948   | 40.00%      | 2.65E-08 | 74(4-77)                                                                                    |                                                                     |                                                              |
| 146 | 113,662  | 114,129 | 468    | 155  | hypothetical protein BpV2_191                    | Bathycoccus sp. RCC1105 virus BpV2 | ADQ91358   | 55.80%      | 2.49E-41 | 123(1-123)                                                                                  |                                                                     |                                                              |
|     | 114,058  | 116,358 | 2301   | 766  | hypothetical protein MPWG_00028                  | Micromonas pusilla virus PL1       | AET43518   | 28.30%      | 5.53E-49 | 425(336-760)                                                                                | Capsid_NCLDV(pfam04451,5.73e-20,178,586-763)                        | Capsid_NCLDV(PF04451,8.3E-27,554-762)                        |
| 147 |          |         |        |      |                                                  |                                    |            |             |          |                                                                                             | Group II dsDNA viruses VP(SSF49749,8.4E-29,353-571;1.2E-22,572-766) |                                                              |
|     |          |         |        |      |                                                  |                                    |            |             |          |                                                                                             | African swine fever virus(2.70.9.20,2.0E-27,575-765)                |                                                              |
|     | 116,359  | 119,514 | 3156   | 1051 | hypothetical protein OtV6_232c                   | Ostreococcus tauri virus RT-2011   | AFC35140.1 | 52.00%      | 0        | 1048(4-1051)                                                                                | HATPase_c(c100075,2.21e-03,111,45-155)                              | Ribosomal protein S5 domain 2-like(SSF54211,1.3E-23,225-370) |
| 148 |          |         |        |      | hypothetical protein CHLNCRAFT_137783            | Chlorella variabilis               | EFN59062.1 | 44.00%      | 0        | 1046(3-1048)                                                                                | PLN03128(PLN03128,0,1050,2-1051)                                    | DNA TOPOISOMERASE 2(PTHR10169:SF19,0,2-1051)                 |

| ID  | Position |         | Length |     | BlastP hit in GenBank nr and/or viruses data set |                                        |              |             |          | NCBI conserved domain (ID, E-value, alignment length in aa, alignment start - end position) | Interproscan matches (ID, E-value, alignment start - end position) |                                                                            |
|-----|----------|---------|--------|-----|--------------------------------------------------|----------------------------------------|--------------|-------------|----------|---------------------------------------------------------------------------------------------|--------------------------------------------------------------------|----------------------------------------------------------------------------|
|     | start    | end     | nt     | aa  | ORF, protein encoded, or mass                    | Species                                | Accession    | Aa identity | E Value  |                                                                                             |                                                                    | Alignment length in aa (Start-end position)                                |
|     |          |         |        |     |                                                  |                                        |              |             |          |                                                                                             | TopoII_MutL_Trans(cl02783,5.17e-27,130,236-365)                    |                                                                            |
|     |          |         |        |     |                                                  |                                        |              |             |          |                                                                                             | TOPRIM_TopoIIA(cd03365,2.18e-62,118,407-524)                       |                                                                            |
|     |          |         |        |     |                                                  |                                        |              |             |          |                                                                                             | TOP4c Superfamily(cl00148,3.04e-97,410,642-1051)                   |                                                                            |
|     | 119,538  | 120,194 | 657    | 218 |                                                  |                                        |              |             |          |                                                                                             |                                                                    | signal-peptide(SignalP-NN(euk),-1.0,1-35)                                  |
| 149 |          |         |        |     |                                                  |                                        |              |             |          |                                                                                             |                                                                    | transmembrane_regions(tmhmm,-1.0,9-31;45-65;74-92;120-138;153-175;189-209) |
|     | 120,195  | 120,659 | 465    | 154 | thiol oxidoreductase                             | Turbot reddish body iridovirus         | ADE34387     | 34.70%      | 7.26E-14 | 98(24-121)                                                                                  | Evr1_Alr(cl02107,1.25e-16,89,26-114)                               | FAD-dependent thiol oxidase(SSF69000,1.2E-21,15-128)                       |
| 150 |          |         |        |     | FAD dependent<br>sulfhydryl oxidase<br>Erv2      | Pyrenophora tritici-repentis Pt-1C-BFP | XP_001933180 | 38.60%      | 1.60E-10 | 83(29-111)                                                                                  |                                                                    | ALR/ERV(PTHR12645,6.1E-10,29-111)                                          |
| 151 | 120,641  | 121,984 | 1344   | 447 |                                                  |                                        |              |             |          |                                                                                             |                                                                    |                                                                            |
| 152 | 121,934  | 122,593 | 660    | 219 |                                                  |                                        |              |             |          |                                                                                             |                                                                    |                                                                            |
| 153 | 122,586  | 122,861 | 276    | 91  | hypothetical protein<br>OtV2_215                 | Ostreococcus tauri virus 2             | YP_004063648 | 39.70%      | 1.60E-04 | 58(11-68)                                                                                   |                                                                    | signal-peptide(SignalP-NN(euk),-1.0,1-27)                                  |





| ID  | Position |         | Length |     | BlastP hit in GenBank nr and/or viruses data set |                                   |              |             |          |                                             | NCBI conserved domain (ID, E-value, alignment length in aa, alignment start - end position) | Interproscan matches (ID, E-value, alignment start - end position)      |  |
|-----|----------|---------|--------|-----|--------------------------------------------------|-----------------------------------|--------------|-------------|----------|---------------------------------------------|---------------------------------------------------------------------------------------------|-------------------------------------------------------------------------|--|
|     | start    | end     | nt     | aa  | ORF, protein encoded, or mass                    | Species                           | Accession    | Aa identity | E Value  | Alignment length in aa (Start-end position) |                                                                                             |                                                                         |  |
| 158 | 125,485  | 125,817 | 333    | 110 |                                                  |                                   |              |             |          |                                             |                                                                                             | Multi_Drug_Res(cl00910,5.71e-06,105,1-105)                              |  |
| 159 | 125,838  | 126,122 | 285    | 94  | hypothetical protein MpV1_191c                   | Micromonas sp. RCC1109 virus MpV1 | YP_004062074 | 33.30%      | 6.97E-04 | 72(1-72)                                    |                                                                                             |                                                                         |  |
| 160 | 126,146  | 126,478 | 333    | 110 |                                                  |                                   |              |             |          |                                             |                                                                                             | signal-peptide(SignalP-NN(euk),-1.0,1-24)                               |  |
| 161 | 126,479  | 127,240 | 762    | 253 | putative N-acetylglucosaminyltransferase         | Flavobacteria bacterium BAL38     | WP_008254071 | 33.00%      | 2.70E-29 | 228(1-228)                                  | Glyco_transf_17(pfam04724,3.28e-30,243,3-245)                                               | Glyco_transf_17(PF04724,3.7E-35,3-230)                                  |  |
| 162 | 127,247  | 127,912 | 666    | 221 | hypothetical protein MpV1_031c                   | Micromonas sp. RCC1109 virus MpV1 | YP_004061914 | 42.00%      | 9.91E-59 | 217(3-219)                                  | Glyco_transf_34 Superfamily(cl05288,2.69e-19,178,23-200)                                    | Glyco_transf_34(PF05637,9.0E-16,21-89;2.5E-5,94-201)                    |  |
|     |          |         |        |     | hypothetical protein COCSUDRAFT_54970            | Coccomyxa subellipsoidea C-169    | EIE18426     | 28.10%      | 8.09E-16 | 196(24-219)                                 |                                                                                             |                                                                         |  |
|     | 127,919  | 128,392 | 474    | 157 | hypothetical protein MPXG_00213                  | Micromonas pusilla virus SP1      | AET85011     | 65.80%      | 1.84E-74 | 156(1-156)                                  | TPP_PYR_DXS_TK_like(cd07033,5.16e-34,152,5-156)                                             | Transket_pyr(PF02779,5.4E-13,1-133)                                     |  |
| 163 |          |         |        |     | hypothetical protein ACD_12C00312G0008           | uncultured bacterium              | EKE14751     | 52.50%      | 1.28E-52 | 156(1-156)                                  |                                                                                             | Thiamin diphosphate-binding fold (THDP-binding)(SSF52518,1.6E-25,1-157) |  |

| ID  | Position |         | Length |     | BlastP hit in GenBank nr and/or viruses data set |                              |              |             |          |                                             | NCBI conserved domain (ID, E-value, alignment length in aa, alignment start - end position) | Interproscan matches (ID, E-value, alignment start - end position)      |
|-----|----------|---------|--------|-----|--------------------------------------------------|------------------------------|--------------|-------------|----------|---------------------------------------------|---------------------------------------------------------------------------------------------|-------------------------------------------------------------------------|
|     | start    | end     | nt     | aa  | ORF, protein encoded, or mass                    | Species                      | Accession    | Aa identity | E Value  | Alignment length in aa (Start-end position) |                                                                                             |                                                                         |
| 164 | 128,298  | 129,002 | 705    | 234 | transketolase domain-containing protein          | Micromonas pusilla virus SP1 | AET85010     | 68.10%      | 3.52E-99 | 209(1-209)                                  | TPP_enzymes super family(c101629,3.36e-31,150,3-152)                                        | Transketolase_N(PF00456,5.6E-12,7-155)                                  |
|     |          |         |        |     | hypothetical protein ACD_12C00312G0009           | uncultured bacterium         | EKE14752     | 40.20%      | 4.87E-45 | 195(1-195)                                  |                                                                                             | Thiamin diphosphate-binding fold (THDP-binding)(SSF52518,1.5E-27,5-165) |
| 165 | 128,983  | 129,828 | 846    | 281 | UDP-glucose epimerase                            | Cystobacter fuscus           | WP_020918602 | 30.20%      | 2.43E-25 | 277(1-277)                                  | SDR_e(cd08946,2.01e-34,203,3-205)                                                           | NAD DEPENDENT EPIMERASE/DEHYDRATASE(PTHR10366,2.0E-38,1-274)            |
|     |          |         |        |     |                                                  |                              |              |             |          |                                             | WcaG(COG0451,3.76e-39,275,1-275)                                                            | NAD(P)-binding Rossmann-fold domains(SSF51735,2.7E-51,2-273)            |
| 166 | 129,911  | 130,612 | 702    | 233 | hypothetical protein MPXG_00211                  | Micromonas pusilla virus SP1 | AET85009     | 48.60%      | 6.57E-64 | 230(3-232)                                  | Methyltransf_21 super family(c117387,1.09e-18,136,56-191)                                   | fbkM_fam: methyltransferase, FkbM family(TIGR01444,1.6E-21,56-191)      |

| ID  | Position |         | Length |     | BlastP hit in GenBank nr and/or viruses data set   |                                    |              |             |          | NCBI conserved domain (ID, E-value, alignment length in aa, alignment start - end position) | Interproscan matches (ID, E-value, alignment start - end position) |                                                                              |
|-----|----------|---------|--------|-----|----------------------------------------------------|------------------------------------|--------------|-------------|----------|---------------------------------------------------------------------------------------------|--------------------------------------------------------------------|------------------------------------------------------------------------------|
|     | start    | end     | nt     | aa  | ORF, protein encoded, or mass                      | Species                            | Accession    | Aa identity | E Value  |                                                                                             |                                                                    | Alignment length in aa (Start-end position)                                  |
|     |          |         |        |     | putative methyltransferase                         | Cyclobacteriaceae bacterium AK24   | WP_010853020 | 28.10%      | 9.33E-12 | 159(33-191)                                                                                 |                                                                    | S-adenosyl-L-methionine-dependent methyltransferases(SSF53335,3.2E-6,33-103) |
|     | 130,646  | 131,593 | 948    | 315 | NAD dependent epimerase/dehydratase family protein | Trichomonas vaginalis G3           | XP_001297395 | 48.10%      | 3.63E-96 | 306(3-308)                                                                                  | dTDP_GD_SDR_e(cd05246,1.17e-139,313,1-313)                         | DTDP-GLUCOSE 4,6-DEHYDRATASE(PTHR10366:SF41,1.3E-132,1-314)                  |
| 167 |          |         |        |     |                                                    |                                    |              |             |          |                                                                                             |                                                                    | NAD DEPENDENT EPIMERASE/DEHYDRATASE(PTHR10366,1.3E-132,1-314)                |
| 168 | 131,580  | 131,936 | 357    | 118 | hypothetical protein BpV2_001c                     | Bathycoccus sp. RCC1105 virus BpV2 | ADQ91168     | 51.30%      | 1.97E-27 | 113(1-113)                                                                                  | rI-1(PHA02604,3.53e-18,111,7-117)                                  |                                                                              |
|     |          |         |        |     | hypothetical protein                               | Salmonella phage PhiSH19           | YP_007008052 | 33.90%      | 2.05E-10 | 115(1-115)                                                                                  |                                                                    |                                                                              |
| 169 | 131,959  | 132,399 | 441    | 146 |                                                    |                                    |              |             |          |                                                                                             |                                                                    |                                                                              |
| 170 | 132,396  | 132,776 | 381    | 126 |                                                    |                                    |              |             |          |                                                                                             |                                                                    |                                                                              |
| 171 | 133,045  | 133,602 | 558    | 185 |                                                    |                                    |              |             |          |                                                                                             |                                                                    |                                                                              |
| 172 | 133,610  | 133,810 | 201    | 66  |                                                    |                                    |              |             |          |                                                                                             |                                                                    |                                                                              |
| 173 | 133,861  | 134,031 | 171    | 56  | predicted protein                                  | Micromonas sp. RCC299              | XP_002503824 | 72.90%      | 7.71E-03 | 48(9-56)                                                                                    |                                                                    |                                                                              |

| ID  | Position |         | Length |     | BlastP hit in GenBank nr and/or viruses data set |                                           |              |             |          | NCBI conserved domain (ID, E-value, alignment length in aa, alignment start - end position) | Interproscan matches (ID, E-value, alignment start - end position) |                                                            |
|-----|----------|---------|--------|-----|--------------------------------------------------|-------------------------------------------|--------------|-------------|----------|---------------------------------------------------------------------------------------------|--------------------------------------------------------------------|------------------------------------------------------------|
|     | start    | end     | nt     | aa  | ORF, protein encoded, or mass                    | Species                                   | Accession    | Aa identity | E Value  |                                                                                             |                                                                    | Alignment length in aa (Start-end position)                |
| 174 | 134,012  | 134,260 | 249    | 82  |                                                  |                                           |              |             |          |                                                                                             |                                                                    |                                                            |
| 175 | 134,310  | 134,543 | 234    | 77  |                                                  |                                           |              |             |          |                                                                                             |                                                                    |                                                            |
| 176 | 134,586  | 134,774 | 189    | 62  |                                                  |                                           |              |             |          |                                                                                             |                                                                    |                                                            |
| 177 | 134,773  | 135,228 | 456    | 151 |                                                  |                                           |              |             |          |                                                                                             |                                                                    |                                                            |
| 178 | 135,253  | 135,489 | 237    | 78  |                                                  |                                           |              |             |          |                                                                                             |                                                                    |                                                            |
| 179 | 135,567  | 136,472 | 906    | 301 | vanillate demethylase oxygenase subunit          | Streptosporangium roseum DSM 43021        | YP_003342065 | 32.10%      | 1.39E-21 | 156(4-159)                                                                                  | Rieske super family(cl00938,6.11e-18,112,4-115)                    | ISP domain(SSF50022,2.6E-18,3-107)                         |
|     |          |         |        |     |                                                  |                                           |              |             |          |                                                                                             | HcaE(COG4638,5.37e-27,293,3-295)                                   | Bet v1-like(SSF55961,1.1E-18,98-301)                       |
| 180 | 136,666  | 137,073 | 408    | 135 | putative phage N-6-adenine-methyltransferase     | Clostridium botulinum                     | WP_003385021 | 47.50%      | 9.37E-28 | 130(5-134)                                                                                  | Dam(cl05442,1.43e-29,129,6-134)                                    | Dam(PF05869,1.6E-28,6-134)                                 |
| 181 | 137,098  | 137,322 | 225    | 74  |                                                  |                                           |              |             |          |                                                                                             |                                                                    |                                                            |
| 182 | 137,319  | 138,032 | 714    | 237 |                                                  |                                           |              |             |          |                                                                                             |                                                                    |                                                            |
| 183 | 138,264  | 138,791 | 528    | 175 |                                                  |                                           |              |             |          |                                                                                             |                                                                    |                                                            |
| 184 | 139,099  | 139,596 | 498    | 165 | GNAT family acetyltransferase                    | Streptococcus henryi                      | WP_018164889 | 32.50%      | 5.93E-09 | 82(44-125)                                                                                  | NAT_SF(cd04301,1.92e-07,57,51-107)                                 | Acyl-CoA N-acyltransferases (Nat)(SSF55729,7.3E-17,24-132) |
| 185 | 139,614  | 140,180 | 567    | 188 | hypothetical protein                             | Lachnospiraceae bacterium 3-2             | WP_016222948 | 29.60%      | 3.35E-02 | 80(108-187)                                                                                 |                                                                    |                                                            |
| 186 | 140,211  | 140,714 | 504    | 167 |                                                  |                                           |              |             |          |                                                                                             |                                                                    |                                                            |
| 187 | 140,739  | 141,179 | 441    | 146 | hypothetical protein BpV1_044c                   | Bathycoccus sp. RCC1105 virus BpV1        | YP_004061474 | 40.90%      | 4.22E-10 | 114(13-126)                                                                                 |                                                                    |                                                            |
|     |          |         |        |     | hypothetical protein                             | Verrucomicrobia bacterium SCGC AAA164-N20 | WP_020036363 | 40.00%      | 1.40E-09 | 114(13-126)                                                                                 |                                                                    |                                                            |

| ID  | Position |         | Length |     | BlastP hit in GenBank nr and/or viruses data set |                                  |              |             |          |                                             | NCBI conserved domain (ID, E-value, alignment length in aa, alignment start - end position) | Interproscan matches (ID, E-value, alignment start - end position) |
|-----|----------|---------|--------|-----|--------------------------------------------------|----------------------------------|--------------|-------------|----------|---------------------------------------------|---------------------------------------------------------------------------------------------|--------------------------------------------------------------------|
|     | start    | end     | nt     | aa  | ORF, protein encoded, or mass                    | Species                          | Accession    | Aa identity | E Value  | Alignment length in aa (Start-end position) |                                                                                             |                                                                    |
| 188 | 141,176  | 141,469 | 294    | 97  |                                                  |                                  |              |             |          |                                             |                                                                                             |                                                                    |
|     | 141,475  | 142,383 | 909    | 302 | hypothetical protein SDRG_07749                  | Saprolegnia diclina VS20         | EQC34951     | 32.10%      | 5.09E-38 | 291(11-301)                                 |                                                                                             |                                                                    |
| 189 |          |         |        |     | hypothetical protein ATCVBr0604L_169             | Acanthocystis turfacea Chlorella | AGE49070     | 33.50%      | 1.23E-37 | 238(65-302)                                 |                                                                                             |                                                                    |
|     |          |         |        |     | R                                                | virus Br0604L Myceliophthora     |              |             |          |                                             |                                                                                             |                                                                    |
| 190 | 142,401  | 143,075 | 675    | 224 | hypothetical protein MYCTH_2050929               | thermophila ATCC 42464           | XP_003660640 | 31.00%      | 2.13E-05 | 175(5-179)                                  | Pyr-5-nucltdase(TIGR01993,9.41e-09,183,5-187)                                               | HAD_2(PF13419,3.3E-7,8-179)                                        |
| 191 | 143,079  | 143,858 | 780    | 259 |                                                  |                                  |              |             |          |                                             |                                                                                             |                                                                    |
| 192 | 144,078  | 144,242 | 165    | 54  |                                                  |                                  |              |             |          |                                             |                                                                                             | transmembrane_regions(tmhmm,-1.0,21-41)                            |
|     |          |         |        |     |                                                  | Ostreococcus lucimarinus virus   | YP_004061839 | 56.60%      | 2.03E-41 | 143(14-156)                                 | trimeric_dUTPase(c100493,1.40e-26,89,37-125)                                                |                                                                    |
| 193 | 144,414  | 144,887 | 474    | 157 | OIV1_207                                         | OIV1                             |              |             |          |                                             |                                                                                             |                                                                    |
|     |          |         |        |     | dUTPase                                          | Pfiesteria piscicida             | ACU44961     | 52.80%      | 2.85E-36 | 142(15-156)                                 |                                                                                             |                                                                    |
| 194 | 144,904  | 145,380 | 477    | 158 |                                                  |                                  |              |             |          |                                             |                                                                                             | transmembrane_regions(tmhmm,-1.0,19-41;56-76;82-100)               |
|     |          |         |        |     |                                                  | Bathycoccus sp. RCC1105 virus    | ADQ91356     | 51.30%      | 0        | 837(1-837)                                  | PolB(COG0417,3.61e-137,817,21-837)                                                          | pol2: DNA polymerase (pol2)(TIGR00592,3.0E-75,445-835)             |
| 195 | 145,410  | 148,031 | 2622   | 873 | hypothetical protein BpV2_189                    | BpV2                             |              |             |          |                                             |                                                                                             |                                                                    |
|     |          |         |        |     |                                                  |                                  |              |             |          |                                             | DnaQ_like_exo(c110012,2.62e-69,223,173-395)                                                 | DNA_pol_B_exo1(PF03104,6.7E-46,37-340)                             |

| ID  | Position |         | Length |      | BlastP hit in GenBank nr and/or viruses data set |                                    |              |             |          |                                             | NCBI conserved domain (ID, E-value, alignment length in aa, alignment start - end position) | Interproscan matches (ID, E-value, alignment start - end position)   |                                     |
|-----|----------|---------|--------|------|--------------------------------------------------|------------------------------------|--------------|-------------|----------|---------------------------------------------|---------------------------------------------------------------------------------------------|----------------------------------------------------------------------|-------------------------------------|
|     | start    | end     | nt     | aa   | ORF, protein encoded, or mass                    | Species                            | Accession    | Aa identity | E Value  | Alignment length in aa (Start-end position) |                                                                                             |                                                                      |                                     |
|     |          |         |        |      |                                                  |                                    |              |             |          |                                             |                                                                                             | POLBc(c110023,4.03e-134,390,447-836)                                 | DNA_pol_B(PF00136,2.9E-114,414-850) |
| 196 | 148,062  | 148,349 | 288    | 95   | hypothetical protein MPWG_00030                  | Micromonas pusilla virus PL1       | AET43520     | 34.60%      | 2.54E-10 | 77(1-77)                                    |                                                                                             |                                                                      |                                     |
| 197 | 148,377  | 148,850 | 474    | 157  | hypothetical protein BpV1_186                    | Bathycoccus sp. RCC1105 virus BpV1 | YP_004061616 | 57.40%      | 5.60E-43 | 116(1-116)                                  |                                                                                             |                                                                      |                                     |
|     | 148,738  | 151,074 | 2337   | 778  | hypothetical protein BpV1_187c                   | Bathycoccus sp. RCC1105 virus BpV1 | YP_004061617 | 30.90%      | 4.03E-52 | 428(348-775)                                | Capsid_NCLDV(pfam04451,5.73e-20,178,586-763)                                                | Capsid_NCLDV(PF04451,5.9E-23 .565-774)                               |                                     |
| 198 |          |         |        |      |                                                  |                                    |              |             |          |                                             |                                                                                             | Group II dsDNA viruses VP(SSSF49749,3.4E-25,375-583;2.3E-21,584-778) |                                     |
|     |          |         |        |      |                                                  |                                    |              |             |          |                                             |                                                                                             | African swine fever virus(2.70.9.20,3.0E-25,587-777)                 |                                     |
|     | 151,077  | 154,280 | 3204   | 1067 | DNA topoisomerase II                             | Ostreococcus tauri virus 2         | YP_004063644 | 50.70%      | 0        | 1066(2-1067)                                | PLN03128(PLN03128,0,1065,3-1067)                                                            | DNA TOPOISOMERASE/GYRASE(PTHR10169,0,0,3-1064)                       |                                     |
| 199 |          |         |        |      | DNA topoisomerase II                             | Enterocytozoon bieneusi H348       | XP_002649941 | 42.80%      | 0        | 1064(3-1066)                                | TopoII_MutL_Trans(c102783,1.51e-18,132,235-366)                                             | TOPRIM_TopoIIA(cd03365,2.78e-61,118,407-524)                         |                                     |

| ID  | Position |         | Length |     | BlastP hit in GenBank nr and/or viruses data set |                                                |              |             |          |                                             | NCBI conserved domain (ID, E-value, alignment length in aa, alignment start - end position) | Interproscan matches (ID, E-value, alignment start - end position) |  |
|-----|----------|---------|--------|-----|--------------------------------------------------|------------------------------------------------|--------------|-------------|----------|---------------------------------------------|---------------------------------------------------------------------------------------------|--------------------------------------------------------------------|--|
|     | start    | end     | nt     | aa  | ORF, protein encoded, or mass                    | Species                                        | Accession    | Aa identity | E Value  | Alignment length in aa (Start-end position) |                                                                                             |                                                                    |  |
|     |          |         |        |     |                                                  |                                                |              |             |          |                                             |                                                                                             | TOP4c Superfamily(cI00148,4.03e-103,412,656-1067)                  |  |
| 200 | 154,330  | 154,704 | 375    | 124 | hypothetical protein EhV003                      | Emiliana huxleyi virus 86                      | YP_293757    | 51.90%      | 2.19E-10 | 53(14-66)                                   |                                                                                             | signal-peptide(SignalP-NN(euk),-1.0,1-51)                          |  |
|     |          |         |        |     | hypothetical protein                             | Archaea                                        | WP_018035822 | 48.40%      | 7.28E-09 | 59(1-59)                                    |                                                                                             | transmembrane_regions(tmhmm,-1.0,10-30;36-56;103-121)              |  |
| 201 | 154,714  | 155,088 | 375    | 124 | erv-family thiol oxidoreductase                  | Pandoravirus dulcis                            | YP_008319152 | 43.50%      | 2.98E-15 | 81(9-89)                                    | Evr1_Alr(cI02107,1.04e-16,81,10-90)                                                         | Evr1_Alr(PF04777,2.5E-16,12-90)                                    |  |
|     |          |         |        |     | predicted protein, partial                       | Physcomitrella patens subsp. patens            | XP_001774132 | 43.50%      | 1.25E-08 | 66(24-89)                                   |                                                                                             | FAD-dependent thiol oxidase(SSF69000,5.8E-16,1-91)                 |  |
| 202 | 155,098  | 155,763 | 666    | 221 | hypothetical protein ATVCCanal1_254R             | Acanthocystis turfacea Chlorella virus Canal-1 | AGE50121     | 38.80%      | 4.58E-43 | 214(5-218)                                  | AdoMet_MTases(cI17173,9.31e-06,81,57-137)                                                   | Methyltransf_24(PF13578,1.4E-9,57-163)                             |  |
|     |          |         |        |     | hypothetical protein                             | Paenibacillus elgii                            | WP_010502997 | 29.90%      | 2.19E-15 | 164(51-214)                                 |                                                                                             |                                                                    |  |
| 203 | 155,787  | 156,278 | 492    | 163 | peptidoglycan-binding protein LysM               | Enterococcus mundtii                           | WP_010735712 | 38.70%      | 4.96E-02 | 62(101-162)                                 |                                                                                             |                                                                    |  |
| 204 | 156,303  | 156,683 | 381    | 126 |                                                  |                                                |              |             |          |                                             |                                                                                             |                                                                    |  |
| 205 | 156,702  | 157,163 | 462    | 153 | hypothetical protein MPVG_00242                  | Micromonas pusilla virus 12T                   | YP_007676306 | 53.30%      | 5.33E-04 | 30(124-153)                                 |                                                                                             |                                                                    |  |
| 206 | 157,178  | 157,432 | 255    | 84  | hypothetical protein OLOG_00122                  | Ostreococcus lucimarinus virus OIV4            | AET84583     | 41.40%      | 8.11E-07 | 58(9-66)                                    |                                                                                             | signal-peptide(SignalP-NN(euk),-1.0,1-24)                          |  |

| ID  | Position |         | Length |     | BlastP hit in GenBank nr and/or viruses data set |                                     |                |             |           |                                             | NCBI conserved domain (ID, E-value, alignment length in aa, alignment start - end position) | Interproscan matches (ID, E-value, alignment start - end position)                   |                                              |
|-----|----------|---------|--------|-----|--------------------------------------------------|-------------------------------------|----------------|-------------|-----------|---------------------------------------------|---------------------------------------------------------------------------------------------|--------------------------------------------------------------------------------------|----------------------------------------------|
|     | start    | end     | nt     | aa  | ORF, protein encoded, or mass                    | Species                             | Accession      | Aa identity | E Value   | Alignment length in aa (Start-end position) |                                                                                             |                                                                                      |                                              |
| 207 | 157,449  | 157,799 | 351    | 116 |                                                  |                                     |                |             |           |                                             |                                                                                             |                                                                                      | transmembrane_regions(tmhmm,-1.0,4-24;49-69) |
| 208 | 157,759  | 158,703 | 945    | 314 | hypothetical protein OtV6_236c                   | Ostreococcus tauri virus RT-2011    | AFC35144       | 43.20%      | 1.02E-78  | 309(4-312)                                  | RfaG(COG0438,8.97e-11,248,99-246)                                                           | GLYCOSYLTRANSFERASE(PTHR12526,5.2E-9,138-245)                                        |                                              |
|     |          |         |        |     | hypothetical protein                             | Sciscionella marina                 | WP_020499425   | 29.70%      | 8.55E-11  | 178(97-274)                                 |                                                                                             | Glycos_transf_1(PF00534,1.4E-8,193-246)<br>signal-peptide(SignalP-NN(euk),-1.0,1-22) |                                              |
| 209 | 158,700  | 159,719 | 1020   | 339 | GDP-mannose 4,6-dehydratase                      | Methanococcus maripaludis C7        | YP_001329560   | 60.30%      | 3.04E-140 | 337(1-337)                                  | Gmd(COG1089,0,337,1-337)                                                                    | gmd: GDP-mannose 4,6-dehydratase(TIGR01472,3.5E-141,2-338)                           |                                              |
|     |          |         |        |     |                                                  |                                     |                |             |           |                                             |                                                                                             | NAD DEPENDENT EPIMERASE/DEHYDRATASE(PTHR10366,3.1E-171,1-337)                        |                                              |
| 210 | 159,926  | 160,252 | 327    | 108 | hypothetical protein                             | Acinetobacter bouvetii              | WP_005009806.1 | 27.00%      | 0.82      | 102(1-102)                                  | Multi_Drug_Res(cl00910,1.80e-04,102,1-102)                                                  | Multi_Drug_Res(F00893,8.1E-7,1-92)                                                   |                                              |
| 211 | 160,276  | 160,569 | 294    | 97  | hypothetical protein OLOG_00294                  | Ostreococcus lucimarinus virus OIV4 | AET84745       | 40.30%      | 8.18E-03  | 62(14-75)                                   |                                                                                             |                                                                                      |                                              |
| 212 | 160,490  | 161,287 | 798    | 265 | N-acetylglucosaminyltransferase                  | Bdellovibrio bacteriovorus HD100    | NP_968551      | 33.80%      | 1.01E-30  | 234(1-234)                                  | Glyco_transf_17(pfam04724,1.37e-23,208,4-211)                                               | Glyco_transf_17(PF04724,1.8E-26,4-238)                                               |                                              |



| ID  | Position |         | Length |     | BlastP hit in GenBank nr and/or viruses data set |                                                 |              |             |          |                                             | NCBI conserved domain (ID, E-value, alignment length in aa, alignment start - end position) | Interproscan matches (ID, E-value, alignment start - end position)                                |
|-----|----------|---------|--------|-----|--------------------------------------------------|-------------------------------------------------|--------------|-------------|----------|---------------------------------------------|---------------------------------------------------------------------------------------------|---------------------------------------------------------------------------------------------------|
|     | start    | end     | nt     | aa  | ORF, protein encoded, or mass                    | Species                                         | Accession    | Aa identity | E Value  | Alignment length in aa (Start-end position) |                                                                                             |                                                                                                   |
|     |          |         |        |     | glycosyltransferase                              | Paramecium bursaria<br>Chlorella virus IL-5-2s1 | AGE54320     | 29.40%      | 2.08E-20 | 228(2-229)                                  |                                                                                             | BETA-1,4-MANNOSYL-GLYCOPROTEIN BETA-1,4-N-ACETYLGLUCOSAMINYL-TRANSFERASE(PTHR12224,5.7E-15,4-121) |
| 213 | 161,277  | 162,017 | 741    | 246 | hypothetical protein BpV1_025                    | Bathycoccus sp.<br>RCC1105 virus<br>BpV1        | YP_004061455 | 52.00%      | 1.96E-81 | 244(1-244)                                  |                                                                                             |                                                                                                   |
|     |          |         |        |     | conserved hypothetical protein, partial          | Brucella suis                                   | WP_004690517 | 45.50%      | 7.36E-15 | 96(4-99)                                    |                                                                                             |                                                                                                   |
| 214 | 162,022  | 162,999 | 978    | 325 | hypothetical protein OIV1_020c                   | Ostreococcus lucimarinus virus<br>OIV1          | YP_004061653 | 36.60%      | 2.11E-29 | 208(16-223)                                 | Methyltransf_21(c117387,5.07e-05,49,91-139)                                                 | Methyltransf_21(PF05050,4.8E-6,91-152)                                                            |
|     |          |         |        |     | hypothetical protein                             | Nitrospina sp.<br>SCGC AAA288-L16               | WP_017952561 | 33.60%      | 1.04E-27 | 222(2-223)                                  |                                                                                             |                                                                                                   |
| 215 | 163,019  | 163,372 | 354    | 117 | hypothetical protein BpV2_001c                   | Bathycoccus sp.<br>RCC1105 virus<br>BpV2        | ADQ91168     | 46.80%      | 4.94E-23 | 109(4-112)                                  | rI.-1(PHA02604,5.50e-19,115,2-116)                                                          |                                                                                                   |
| 216 | 163,413  | 164,819 | 1407   | 468 | hypothetical protein CC1G_07068                  | Coprinopsis cinerea okayama7#130                | XP_001836421 | 22.90%      | 1.08E-02 | 160(154-313)                                |                                                                                             |                                                                                                   |

| ID  | Position |         | Length |     | BlastP hit in GenBank nr and/or viruses data set    |                                     |              |             |          |                                             | NCBI conserved domain (ID, E-value, alignment length in aa, alignment start - end position) | Interproscan matches (ID, E-value, alignment start - end position) |
|-----|----------|---------|--------|-----|-----------------------------------------------------|-------------------------------------|--------------|-------------|----------|---------------------------------------------|---------------------------------------------------------------------------------------------|--------------------------------------------------------------------|
|     | start    | end     | nt     | aa  | ORF, protein encoded, or mass                       | Species                             | Accession    | Aa identity | E Value  | Alignment length in aa (Start-end position) |                                                                                             |                                                                    |
| 217 | 164,829  | 165,494 | 666    | 221 | putative prolyl 4-hydroxylase                       | Acanthamoeba polyphaga mimivirus    | YP_003987108 | 44.20%      | 1.36E-53 | 189(33-221)                                 | 2OG-FeII_Oxy_3(c117304,2.66e-26,170,48-217)                                                 | FE2OG_OXY(PS51471,10.012,107-218)                                  |
|     |          |         |        |     | oxidoreductase, 2OG-Fe(II) oxygenase family protein | Acidithiobacillus sp. GGI-221       | WP_009569450 | 37.20%      | 9.34E-31 | 178(44-221)                                 |                                                                                             | PROLYL 4-HYDROXYLASE ALPHA SUBUNIT(PTHR10869,4.3E-29,35-221)       |
| 218 | 165,623  | 166,297 | 675    | 224 | hypothetical protein OtV2_235                       | Ostreococcus tauri virus 2          | YP_004063668 | 42.60%      | 8.59E-11 | 101(70-170)                                 |                                                                                             |                                                                    |
| 219 | 166,294  | 166,677 | 384    | 127 | hypothetical protein BpV2_179                       | Bathycoccus sp. RCC1105 virus BpV2  | ADQ91346     | 41.70%      | 1.91E-15 | 108(7-114)                                  |                                                                                             | signal-peptide(SignalP-NN(euk),-1.0,1-26)                          |
|     |          |         |        |     |                                                     |                                     |              |             |          |                                             |                                                                                             | transmembrane_regions(tmhmm,-1.0,5-25;89-107)                      |
| 220 | 166,757  | 167,395 | 639    | 212 |                                                     |                                     |              |             |          |                                             |                                                                                             |                                                                    |
| 221 | 167,388  | 167,570 | 183    | 60  |                                                     |                                     |              |             |          |                                             |                                                                                             |                                                                    |
| 222 | 167,567  | 168,949 | 1383   | 460 | hypothetical protein OLN00139                       | Ostreococcus lucimarinus virus OIV5 | YP_007674781 | 34.90%      | 4.66E-85 | 456(2-457)                                  |                                                                                             | ARIADNE RING ZINC FINGER(PTHR11685,4.8E-8,238-295)                 |
|     |          |         |        |     | hypothetical protein                                | Trichomonas vaginalis G3            | XP_001301335 | 44.00%      | 5.22E-16 | 90(209-298)                                 |                                                                                             | RING/U-box(SSF57850,5.4E-9,245-302)                                |
| 223 | 168,955  | 169,821 | 867    | 288 | mannosyltransferase                                 | Acidovorax sp. MR-S7                | WP_020226670 | 32.60%      | 3.95E-36 | 256(21-276)                                 | Gly_transf_sug(pfam04488,1.73e-05,81,44-124)                                                | Caps_synth(PF05704,2.3E-21,29-171)                                 |

| ID     | Position |         | Length |     | BlastP hit in GenBank nr and/or viruses data set |                                     |                   |             |          | NCBI conserved domain (ID, E-value, alignment length in aa, alignment start - end position) | Interproscan matches (ID, E-value, alignment start - end position) |                                             |
|--------|----------|---------|--------|-----|--------------------------------------------------|-------------------------------------|-------------------|-------------|----------|---------------------------------------------------------------------------------------------|--------------------------------------------------------------------|---------------------------------------------|
|        | start    | end     | nt     | aa  | ORF, protein encoded, or mass                    | Species                             | Accession         | Aa identity | E Value  |                                                                                             |                                                                    | Alignment length in aa (Start-end position) |
|        |          |         |        |     |                                                  |                                     |                   |             |          |                                                                                             |                                                                    | signal-peptide(SignalP-NN(euk),-1.0,1-23)   |
| 224    | 169,845  | 170,021 | 177    | 58  |                                                  |                                     |                   |             |          |                                                                                             |                                                                    |                                             |
| 225    | 170,428  | 170,799 | 372    | 123 | hypothetical protein<br>MAR_ORF180               | Marseillevirus                      | YP_003406923      | 36.80%      | 4.11E-04 | 86(35-120)                                                                                  | T5orf172(c117462,2.90e-03,88,35-122)                               |                                             |
| YSLPV3 |          |         |        |     |                                                  |                                     |                   |             |          |                                                                                             |                                                                    |                                             |
|        | 344      | 1501    | 1158   | 385 | hypothetical protein<br>OtV6_076                 | Ostreococcus tauri<br>virus RT-2011 | AFC34984          | 45.80%      | 1.46E-94 | 385(1-385)                                                                                  | Capsid_NCLDV(pfam04451,1.68e-25,182,200-381)                       | Capsid_NCLDV(PF04451,1.7E-21,200-381)       |
| 1      |          |         |        |     |                                                  | Verrucomicrobia                     |                   |             |          |                                                                                             |                                                                    |                                             |
|        |          |         |        |     | hypothetical protein                             | bacterium                           | SCGC WP_020036256 | 41.30%      | 3.26E-85 | 385(1-385)                                                                                  |                                                                    |                                             |
|        |          |         |        |     |                                                  | AAA164-N20                          |                   |             |          |                                                                                             |                                                                    |                                             |
|        | 1,524    | 2,621   | 1098   | 365 | hypothetical protein<br>MpV1_098c                | Micromonas sp.<br>RCC1109 virus     | YP_004061981      | 30.90%      | 1.65E-28 | 357(2-358)                                                                                  |                                                                    | signal-peptide(SignalP-NN(euk),-1.0,1-15)   |
| 2      |          |         |        |     |                                                  | MpV1                                |                   |             |          |                                                                                             |                                                                    |                                             |
|        |          |         |        |     |                                                  | Verrucomicrobia                     |                   |             |          |                                                                                             |                                                                    |                                             |
|        |          |         |        |     | hypothetical protein                             | bacterium                           | SCGC WP_020036348 | 28.40%      | 2.32E-18 | 350(8-357)                                                                                  |                                                                    |                                             |
|        |          |         |        |     |                                                  | AAA164-N20                          |                   |             |          |                                                                                             |                                                                    |                                             |
| 3      | 2,612    | 2,929   | 318    | 105 |                                                  |                                     |                   |             |          |                                                                                             |                                                                    |                                             |
|        | 2,950    | 3,588   | 639    | 212 | hypothetical protein<br>OtV6_102c                | Ostreococcus tauri<br>virus RT-2011 | AFC35010          | 42.10%      | 1.91E-43 | 186(2-187)                                                                                  |                                                                    | transmembrane_regions(tmhmm,-1.0,48-66)     |
| 4      |          |         |        |     |                                                  | Verrucomicrobia                     |                   |             |          |                                                                                             |                                                                    |                                             |
|        |          |         |        |     | hypothetical protein                             | bacterium                           | SCGC WP_020036350 | 37.60%      | 5.23E-09 | 93(64-156)                                                                                  |                                                                    |                                             |
|        |          |         |        |     |                                                  | AAA164-N20                          |                   |             |          |                                                                                             |                                                                    |                                             |
| 5      | 3,597    | 4,145   | 549    | 182 | hypothetical protein                             | Bathycoccus sp.                     | YP_004061519      | 46.60%      | 6.94E-30 | 148(1-148)                                                                                  |                                                                    |                                             |

| ID | Position |       | Length |     | BlastP hit in GenBank nr and/or viruses data set |                                   |              |             |          | NCBI conserved domain (ID, E-value, alignment length in aa, alignment start - end position) | Interproscan matches (ID, E-value, alignment start - end position) |                                             |
|----|----------|-------|--------|-----|--------------------------------------------------|-----------------------------------|--------------|-------------|----------|---------------------------------------------------------------------------------------------|--------------------------------------------------------------------|---------------------------------------------|
|    | start    | end   | nt     | aa  | ORF, protein encoded, or mass                    | Species                           | Accession    | Aa identity | E Value  |                                                                                             |                                                                    | Alignment length in aa (Start-end position) |
| 6  |          |       |        |     | BpV1_089c                                        | RCC1105 virus                     |              |             |          |                                                                                             |                                                                    |                                             |
|    |          |       |        |     | hypothetical protein                             | BpV1<br>Verrucomicrobia           |              |             |          |                                                                                             |                                                                    |                                             |
|    | 4,176    | 4,391 | 216    | 71  | MPWG_00152                                       | bacterium SCGC<br>AAA164-N20      | WP_020036351 | 46.60%      | 9.86E-30 | 148(1-148)                                                                                  |                                                                    |                                             |
| 7  |          |       |        |     | hypothetical protein                             | Micromonas pusilla<br>virus PL1   | AET43639     | 46.40%      | 9.23E-11 | 65(1-65)                                                                                    |                                                                    | transmembrane_regions(tmhmm , -1.0,9-27)    |
|    | 4,418    | 5,236 | 819    | 272 | MPWG_00151                                       | Verrucomicrobia                   |              |             |          |                                                                                             |                                                                    |                                             |
| 8  |          |       |        |     | hypothetical protein                             | bacterium SCGC<br>AAA164-N20      | WP_020036352 | 47.50%      | 1.29E-08 | 59(2-60)                                                                                    |                                                                    |                                             |
| 9  |          |       |        |     | hypothetical protein                             | Micromonas pusilla<br>virus PL1   | AET43638     | 35.70%      | 2.00E-34 | 272(1-272)                                                                                  |                                                                    |                                             |
| 10 |          |       |        |     | hypothetical protein                             | Ostreococcus<br>lucimarinus virus | YP_004061741 | 36.90%      | 6.25E-19 | 122(5-126)                                                                                  |                                                                    |                                             |
|    | 5,931    | 6,314 | 384    | 127 | OIV1_108c                                        | OIV1<br>Verrucomicrobia           |              |             |          |                                                                                             |                                                                    |                                             |
| 11 |          |       |        |     | hypothetical protein                             | bacterium SCGC<br>AAA164-N20      | WP_020036584 | 38.50%      | 1.14E-14 | 115(13-127)                                                                                 |                                                                    | signal-peptide(SignalP-NN(euk), -1.0,1-24)  |
|    | 6,346    | 6,876 | 531    | 176 |                                                  |                                   |              |             |          |                                                                                             |                                                                    |                                             |
| 11 |          |       |        |     | hypothetical protein                             | Bathycoccus sp.<br>RCC1105 virus  | ADQ91261     | 45.10%      | 7.75E-34 | 129(1-129)                                                                                  |                                                                    | transmembrane_regions(tmhmm , -1.0,5-23)    |
|    | 6,943    | 7,344 | 402    | 133 | BpV2_094                                         | BpV2                              |              |             |          |                                                                                             |                                                                    |                                             |

| ID | Position |        | Length |     | BlastP hit in GenBank nr and/or viruses data set |                                                 |                      |             |          |                                             | NCBI conserved domain (ID, E-value, alignment length in aa, alignment start - end position) | Interproscan matches (ID, E-value, alignment start - end position)       |
|----|----------|--------|--------|-----|--------------------------------------------------|-------------------------------------------------|----------------------|-------------|----------|---------------------------------------------|---------------------------------------------------------------------------------------------|--------------------------------------------------------------------------|
|    | start    | end    | nt     | aa  | ORF, protein encoded, or mass                    | Species                                         | Accession            | Aa identity | E Value  | Alignment length in aa (Start-end position) |                                                                                             |                                                                          |
|    |          |        |        |     | hypothetical protein                             | Verrucomicrobia<br>bacterium                    | SCGC<br>WP_020036355 | 44.40%      | 6.09E-32 | 129(1-129)                                  |                                                                                             |                                                                          |
| 12 | 7,369    | 8,109  | 741    | 246 | PCNA                                             | Ostreococcus tauri<br>virus 2                   | YP_004063533         | 53.90%      | 1.52E-83 | 244(1-244)                                  | PCNA(cd00577,1.88e-45,242,4-245)                                                            | pcna: proliferating cell nuclear antigen (pcna)(TIGR00590,1.6E-49,3-245) |
|    |          |        |        |     | hypothetical protein                             | Verrucomicrobia<br>bacterium                    | SCGC<br>WP_020036354 | 54.10%      | 1.53E-82 | 244(1-244)                                  | PHA03383(PHA03383,3.51e-81,244,1-244)                                                       |                                                                          |
| 13 | 8,132    | 9,040  | 909    | 302 | hypothetical protein<br>OMVG_00153               | Ostreococcus<br>lucimarinus virus               | AFK66153             | 52.50%      | 5.03E-91 | 293(10-302)                                 | Pox_VLTF3(pfam04947,1.16e-56,174,128-301)                                                   | Pox_VLTF3(PF04947,4.7E-53,130-300)                                       |
| 14 | 9,076    | 9,744  | 669    | 222 | hypothetical protein<br>PBCVAN69C_686L           | Paramecium<br>bursaria Chlorella<br>virus AN69C | AGE48616             | 39.40%      | 1.89E-27 | 184(3-186)                                  | HNHc(cl00083,3.66e-03,40,129-168)                                                           |                                                                          |
| 15 | 9,704    | 10,096 | 393    | 130 | hypothetical protein<br>BpV1_099c                | Bathycoccus sp.<br>RCC1105 virus                | YP_004061529         | 51.50%      | 7.09E-30 | 101(4-104)                                  | PDDEXK_3(cl16254,5.47e-31,100,16-115)                                                       | PDDEXK_3(PF13366,3.2E-29,10-114)                                         |
|    |          |        |        |     | hypothetical protein<br>tll0632                  | Thermosynechococcus<br>elongatus BP-1           | NP_681421            | 42.90%      | 4.57E-20 | 101(4-104)                                  |                                                                                             |                                                                          |
| 16 | 10,155   | 10,889 | 735    | 244 |                                                  |                                                 |                      |             |          |                                             |                                                                                             | transmembrane_regions(tmhmm , -1.0,76-96;168-186)                        |
| 17 | 10,901   | 11,323 | 423    | 140 | hypothetical protein<br>OtV6_119c                | Ostreococcus tauri<br>virus RT-2011             | AFC35027             | 42.50%      | 3.19E-07 | 78(53-130)                                  |                                                                                             |                                                                          |

| ID | Position |        | Length |     | BlastP hit in GenBank nr and/or viruses data set |                                    |              |             |          |                                             | NCBI conserved domain (ID, E-value, alignment length in aa, alignment start - end position) | Interproscan matches (ID, E-value, alignment start - end position) |
|----|----------|--------|--------|-----|--------------------------------------------------|------------------------------------|--------------|-------------|----------|---------------------------------------------|---------------------------------------------------------------------------------------------|--------------------------------------------------------------------|
|    | start    | end    | nt     | aa  | ORF, protein encoded, or mass                    | Species                            | Accession    | Aa identity | E Value  | Alignment length in aa (Start-end position) |                                                                                             |                                                                    |
| 18 | 11,336   | 12,130 | 795    | 264 | hypothetical protein MPXG_00049                  | Micromonas pusilla virus SP1       | AET84847     | 36.40%      | 3.78E-39 | 257(2-258)                                  | Patatin_and_cPLA2(c111396,2.93e-09,127,59-185)                                              | FabD/lysophospholipase-like(SSSF52151,5.9E-23,1-244)               |
|    |          |        |        |     | patatin-like phospholipase protein               | uncultured bacterium               | EKD54247     | 23.90%      | 5.75E-12 | 244(15-258)                                 |                                                                                             | Patatin(PF01734,3.1E-13,10-186)                                    |
| 19 | 12,143   | 12,514 | 372    | 123 | hypothetical protein BpV1_114c                   | Bathycoccus sp. RCC1105 virus BpV1 | YP_004061544 | 51.60%      | 7.10E-20 | 121(3-123)                                  |                                                                                             | signal-peptide(SignalP-NN(euk),-1.0,1-52)                          |
|    |          |        |        |     |                                                  |                                    |              |             |          |                                             |                                                                                             | transmembrane_regions(tmhmm , -1.0,9-27;37-55;65-85;91-113)        |
| 20 | 12,521   | 12,913 | 393    | 130 |                                                  |                                    |              |             |          |                                             |                                                                                             |                                                                    |
| 21 | 12,910   | 13,257 | 348    | 115 | hypothetical protein MpV1_128c                   | Micromonas sp. RCC1109 virus MpV1  | YP_004062011 | 41.10%      | 7.35E-15 | 112(2-113)                                  |                                                                                             |                                                                    |
| 22 | 13,335   | 13,811 | 477    | 158 | hypothetical protein OtV6_125c                   | Ostreococcus tauri virus RT-2011   | AFC35033     | 53.40%      | 4.16E-25 | 88(61-148)                                  |                                                                                             | signal-peptide(SignalP-NN(euk),-1.0,1-26)                          |
|    |          |        |        |     | hypothetical protein                             | Marine Group II euryarchaeote      | WP_018035657 | 39.80%      | 1.75E-04 | 86(68-153)                                  |                                                                                             | transmembrane_regions(tmhmm , -1.0,5-20)                           |
| 23 | 13,844   | 14,389 | 546    | 181 | hypothetical protein                             | Ostreococcus virus                 | YP_001648217 | 36.90%      | 4.20E-22 | 168(1-168)                                  |                                                                                             |                                                                    |

| ID | Position |        | Length |     | BlastP hit in GenBank nr and/or viruses data set |                                     |                   |             |          |                                             | NCBI conserved domain (ID, E-value, alignment length in aa, alignment start - end position) | Interproscan matches (ID, E-value, alignment start - end position) |                                            |
|----|----------|--------|--------|-----|--------------------------------------------------|-------------------------------------|-------------------|-------------|----------|---------------------------------------------|---------------------------------------------------------------------------------------------|--------------------------------------------------------------------|--------------------------------------------|
|    | start    | end    | nt     | aa  | ORF, protein encoded, or mass                    | Species                             | Accession         | Aa identity | E Value  | Alignment length in aa (Start-end position) |                                                                                             |                                                                    |                                            |
|    |          |        |        |     | OsV5_140r                                        | OsV5                                |                   |             |          |                                             |                                                                                             |                                                                    |                                            |
| 24 | 14,423   | 14,803 | 381    | 126 |                                                  |                                     |                   |             |          |                                             |                                                                                             |                                                                    | transmembrane_regions(tmhmm ,-1.0,105-125) |
|    | 14,835   | 15,302 | 468    | 155 | hypothetical protein OIV1_150c                   | Ostreococcus lucimarinus virus OIV1 | YP_004061783      | 57.40%      | 5.04E-32 | 119(9-127)                                  | SWIB(cl02489,1.90e-05,79,47-125)                                                            | SWIB/MDM2 domain(SSF47592,3.7E-10,38-135)                          |                                            |
| 25 |          |        |        |     | hypothetical protein                             | Verrucomicrobia bacterium           | SCGC WP_018003588 | 27.70%      | 7.27E-06 | 115(12-126)                                 |                                                                                             |                                                                    |                                            |
|    |          |        |        |     |                                                  | AB-629-E09                          |                   |             |          |                                             |                                                                                             |                                                                    |                                            |
| 26 | 15,386   | 16,150 | 765    | 254 | hypothetical protein OtV6_130                    | Ostreococcus tauri virus RT-2011    | AFC35038          | 58.60%      | 2.38E-86 | 215(12-226)                                 | RNaseIII(TIGR02191,2.66e-61,22-226)                                                         | RNaseIII: ribonuclease III(TIGR02191,3.5E-55,20-226)               |                                            |
| 27 | 16,089   | 16,838 | 750    | 249 | hypothetical protein BpV2_126                    | Bathycoccus sp. RCC1105 virus BpV2  | ADQ91293          | 52.90%      | 5.68E-58 | 189(21-209)                                 | YqaJ(cl09232,1.46e-33,125,29-153)                                                           | Restriction endonuclease-like(SSF52980,4.6E-46,5-217)              |                                            |
| 28 | 16,985   | 17,458 | 474    | 157 |                                                  |                                     |                   |             |          |                                             |                                                                                             |                                                                    | transmembrane_regions(tmhmm ,-1.0,137-155) |





| ID | Position |        | Length |     | BlastP hit in GenBank nr and/or viruses data set        |                                |              |             |          |                                             |                                       | NCBI conserved domain (ID, E-value, alignment length in aa, alignment start - end position) | Interproscan matches (ID, E-value, alignment start - end position) |
|----|----------|--------|--------|-----|---------------------------------------------------------|--------------------------------|--------------|-------------|----------|---------------------------------------------|---------------------------------------|---------------------------------------------------------------------------------------------|--------------------------------------------------------------------|
|    | start    | end    | nt     | aa  | ORF, protein encoded, or mass                           | Species                        | Accession    | Aa identity | E Value  | Alignment length in aa (Start-end position) |                                       |                                                                                             |                                                                    |
| 35 | 21,941   | 22,471 | 531    | 176 | hypothetical protein OIV1_144                           | Ostreococcus lucimarinus virus | YP_004061777 | 26.30%      | 1.00E-05 | 121(27-147)                                 |                                       |                                                                                             |                                                                    |
| 36 | 22,530   | 22,859 | 330    | 109 |                                                         |                                |              |             |          |                                             |                                       |                                                                                             |                                                                    |
|    | 22,979   | 23,197 | 219    | 72  |                                                         |                                |              |             |          |                                             |                                       | signal-peptide(SignalP-NN(euk),-1.0,1-22)                                                   |                                                                    |
| 37 |          |        |        |     |                                                         |                                |              |             |          |                                             |                                       |                                                                                             |                                                                    |
|    | 23,205   | 23,447 | 243    | 80  | hypothetical protein MPXG_00060                         | Micromonas pusilla virus SP1   | AET84858     | 56.10%      | 8.09E-05 | 59(3-61)                                    |                                       |                                                                                             |                                                                    |
| 38 |          |        |        |     | EsV-1-52                                                | Ectocarpus siliculosus         | CBN80356     | 56.80%      | 5.49E-02 | 43(3-45)                                    |                                       | transmembrane_regions(tmhmm -,1.0,5-27;46-66)                                               |                                                                    |
| 39 | 23,487   | 23,984 | 498    | 165 | GNAT family acetyltransferase                           | Streptococcus henryi           | WP_018164889 | 31.30%      | 1.19E-08 | 82(44-125)                                  | NAT_SF(c117182,7.15e-07,57,51-107)    | Acyl-CoA N-acyltransferases (Nat)(SSF55729,8.0E-15,24-132)                                  |                                                                    |
|    | 24,327   | 24,860 | 534    | 177 | hypothetical protein OMVG_00253                         | Ostreococcus lucimarinus virus | AFK66247     | 43.80%      | 2.72E-25 | 121(3-123)                                  | GIY-YIG_SF(c115257,3.03e-09,55,5-59)  | zf-CCHC(PF00098,2.2E-6,103-118;1.5E-4,159-174)                                              |                                                                    |
| 40 |          |        |        |     | nucleic acid binding protein / zinc ion binding protein | Galdieria sulphuraria          | EME30645     | 34.20%      | 2.23E-24 | 171(5-175)                                  | PTZ00368(PTZ00368,6.21e-06,85,89-173) | GIY-YIG(PF01541,9.3E-9,5-70)                                                                |                                                                    |
| 41 | 24,909   | 25,070 | 162    | 53  | hypothetical protein PGCG_00053                         | Phaeocystis globosa virus      | YP_008052372 | 59.60%      | 3.05E-09 | 52(1-52)                                    |                                       |                                                                                             |                                                                    |





| ID | Position |        | Length |     | BlastP hit in GenBank nr and/or viruses data set |                                     |              |             |          |                                             | NCBI conserved domain (ID, E-value, alignment length in aa, alignment start - end position) | Interproscan matches (ID, E-value, alignment start - end position)                   |                                           |
|----|----------|--------|--------|-----|--------------------------------------------------|-------------------------------------|--------------|-------------|----------|---------------------------------------------|---------------------------------------------------------------------------------------------|--------------------------------------------------------------------------------------|-------------------------------------------|
|    | start    | end    | nt     | aa  | ORF, protein encoded, or mass                    | Species                             | Accession    | Aa identity | E Value  | Alignment length in aa (Start-end position) |                                                                                             |                                                                                      |                                           |
| 61 | 34,675   | 34,854 | 180    | 59  |                                                  |                                     |              |             |          |                                             |                                                                                             |                                                                                      | transmembrane_regions(tmhmm , -1.0,34-54) |
| 62 | 34,853   | 35,854 | 1002   | 333 | hypothetical protein OIV1_184c                   | Ostreococcus lucimarinus virus OIV1 | YP_004061816 | 31.20%      | 4.51E-35 | 304(23-326)                                 | RFC1(pfam08519,4.41e-03,116,217-332)                                                        | DNA polymerase III clamp loader subunits, C-terminal domain(SSF48019,7.4E-6,171-287) |                                           |
| 63 | 35,896   | 36,903 | 1008   | 335 | putative type II DNA methyltransferase           | Organic Lake phycodnavirus 1        | ADX05980     | 56.30%      | 4.89E-99 | 244(90-333)                                 | AdoMet_MTases(c117173,5.57e-05,81,93-173)                                                   | S-adenosyl-L-methionine-dependent methyltransferases(SSF53335,1.0E-7,65-172)         |                                           |
|    |          |        |        |     | restriction endonuclease subunit M               | Campylobacter upsaliensis           | WP_004278076 | 41.80%      | 1.34E-85 | 333(3-335)                                  |                                                                                             |                                                                                      |                                           |
| 64 | 36,878   | 37,447 | 570    | 189 | hypothetical protein 162313455                   | Campylobacter upsaliensis           | WP_004278077 | 31.60%      | 1.26E-10 | 132(28-159)                                 |                                                                                             |                                                                                      |                                           |
|    |          |        |        |     | hypothetical protein 162313455                   | Organic Lake phycodnavirus 1        | ADX05979     | 33.60%      | 1.95E-04 | 110(20-129)                                 |                                                                                             |                                                                                      |                                           |
| 65 | 37,488   | 38,069 | 582    | 193 | hypothetical protein MPVG_00171                  | Micromonas pusilla virus 12T        | YP_007676236 | 42.90%      | 6.60E-44 | 177(15-191)                                 | Clp_protease_like(c115763,1.73e-23,131,61-191)                                              | CLP_protease(PF00574,2.1E-26,56-191)                                                 |                                           |
|    |          |        |        |     | ATP-dependent Clp protease proteolytic subunit   | Clostridium sp. HGF2                | WP_002605985 | 35.50%      | 1.47E-14 | 136(56-191)                                 |                                                                                             | ClpP/crotonase(SSF52096,1.5E-27,61-192)                                              |                                           |

| ID | Position |        | Length |     | BlastP hit in GenBank nr and/or viruses data set |                                   |              |             |           | NCBI conserved domain (ID, E-value, alignment length in aa, alignment start - end position) | Interproscan matches (ID, E-value, alignment start - end position) |                                                                       |
|----|----------|--------|--------|-----|--------------------------------------------------|-----------------------------------|--------------|-------------|-----------|---------------------------------------------------------------------------------------------|--------------------------------------------------------------------|-----------------------------------------------------------------------|
|    | start    | end    | nt     | aa  | ORF, protein encoded, or mass                    | Species                           | Accession    | Aa identity | E Value   |                                                                                             |                                                                    | Alignment length in aa (Start-end position)                           |
| 66 | 38,136   | 38,489 | 354    | 117 |                                                  |                                   |              |             |           |                                                                                             |                                                                    | signal-peptide(SignalP-NN(euk),-1.0,1-3)                              |
|    |          |        |        |     |                                                  |                                   |              |             |           |                                                                                             |                                                                    | transmembrane_regions(tmhmm , -1.0,51-71)                             |
| 67 | 38,462   | 39,421 | 960    | 319 | transcription initiation factor IIB              | Micromonas pusilla virus PL1      | AET43585     | 44.50%      | 5.80E-77  | 310(7-316)                                                                                  | SUA7(COG1405,1.34e-21,259,47-305)                                  | TRANSCRIPTION FACTOR INITIATION IIB-RELATED(PTHR11618,1.8E-30,49-301) |
|    |          |        |        |     | general transcription factor TFIIIB              | Ogataea parapolyomorpha DL-1      | EFW96389     | 27.80%      | 1.29E-18  | 260(22-281)                                                                                 |                                                                    |                                                                       |
| 68 | 39,434   | 40,177 | 744    | 247 | hypothetical protein MpV1_158                    | Micromonas sp. RCC1109 virus MpV1 | YP_004062041 | 61.40%      | 1.64E-109 | 241(7-247)                                                                                  |                                                                    | signal-peptide(SignalP-NN(euk),-1.0,1-15)                             |
|    |          |        |        |     |                                                  |                                   |              |             |           |                                                                                             |                                                                    | transmembrane_regions(tmhmm , -1.0,5-23)                              |
| 69 |          |        |        |     |                                                  |                                   |              |             |           |                                                                                             |                                                                    | Nucleotide-diphospho-sugar transferases(SSF53448,7.6E-7,53-236)       |
|    | 40,194   | 40,829 | 636    | 211 | hypothetical protein OtV6_160                    | Ostreococcus tauri virus RT-2011  | AFC35068     | 38.70%      | 1.22E-39  | 199(9-207)                                                                                  |                                                                    |                                                                       |

| ID | Position |        | Length |     | BlastP hit in GenBank nr and/or viruses data set         |                                     |              |             |          |                                             | NCBI conserved domain (ID, E-value, alignment length in aa, alignment start - end position) | Interproscan matches (ID, E-value, alignment start - end position) |
|----|----------|--------|--------|-----|----------------------------------------------------------|-------------------------------------|--------------|-------------|----------|---------------------------------------------|---------------------------------------------------------------------------------------------|--------------------------------------------------------------------|
|    | start    | end    | nt     | aa  | ORF, protein encoded, or mass                            | Species                             | Accession    | Aa identity | E Value  | Alignment length in aa (Start-end position) |                                                                                             |                                                                    |
| 70 | 40,919   | 41,749 | 831    | 276 | hypothetical protein H665_p156                           | Ostreococcus tauri virus 1          | YP_003212979 | 44.90%      | 5.58E-68 | 270(5-274)                                  | Adenylation_DNA_ligase_like(c12015,2.44e-41,170,18-187)                                     | MRNA-CAPPING ENZYME(PTHR10367,8.2E-35,17-274)                      |
|    |          |        |        |     | mRNA capping enzyme family protein (ISS), partial        | Ostreococcus tauri                  | XP_003075327 | 32.20%      | 6.39E-28 | 259(16-274)                                 | mRNA_cap_C(pfam03919,4.22e-05,81,192-272)                                                   |                                                                    |
| 71 | 41,831   | 42,523 | 693    | 230 | hypothetical protein OLNG_00095                          | Ostreococcus lucimarinus virus OIV5 | YP_007674737 | 35.10%      | 1.86E-29 | 188(1-188)                                  | Peptidase_C19(c102553,4.73e-13,111,3-113)                                                   | UCH_2_3(PS50235,11.627,2-230)                                      |
|    |          |        |        |     | PREDICTED: ubiquitin carboxyl-terminal hydrolase 33-like | Meleagris gallopavo                 | XP_003208801 | 34.60%      | 2.69E-12 | 129(1-129)                                  | UCH(pfam00443,4.08e-23,202,2-203)                                                           | Cysteine proteinases(SSF54001,1.3E-28,1-199)                       |
| 72 | 42,553   | 43,170 | 618    | 205 | hypothetical protein BpV2_156                            | Bathycoccus sp. RCC1105 virus BpV2  | ADQ91323     | 38.90%      | 2.17E-36 | 183(20-202)                                 | CYTH-like_Pase(c111964,3.79e-14,118,85-202)                                                 | mRNA_triPase(PF02940,4.2E-12,45-179)                               |
|    |          |        |        |     | hypothetical protein SCHCODRAFT_233597                   | Schizophyllum commune H4-8          | XP_003034557 | 26.90%      | 4.62E-02 | 115(85-199)                                 |                                                                                             | CYTH-like phosphatases(SSF55154,7.2E-12,32-205)                    |
| 73 | 43,167   | 45,695 | 2529   | 842 |                                                          |                                     |              |             |          |                                             |                                                                                             | Beta2-adaptin/TBP, C-terminal domain(3.30.310.10,9.8E-4,148-216)   |
| 74 | 45,714   | 47,639 | 1926   | 641 | hypothetical protein OIV1_165c                           | Ostreococcus lucimarinus virus OIV1 | YP_004061797 | 54.40%      | 0        | 516(121-636)                                | primase_Cterm(TIGR01613,2.40e-14,147,370-516)                                               | SF3_HELICASE_1(PS51206,12.854,340-504)                             |

| ID | Position |        | Length |     | BlastP hit in GenBank nr and/or viruses data set |                                     |              |             |           |                                             | NCBI conserved domain (ID, E-value, alignment length in aa, alignment start - end position) | Interproscan matches (ID, E-value, alignment start - end position)             |
|----|----------|--------|--------|-----|--------------------------------------------------|-------------------------------------|--------------|-------------|-----------|---------------------------------------------|---------------------------------------------------------------------------------------------|--------------------------------------------------------------------------------|
|    | start    | end    | nt     | aa  | ORF, protein encoded, or mass                    | Species                             | Accession    | Aa identity | E Value   | Alignment length in aa (Start-end position) |                                                                                             |                                                                                |
|    |          |        |        |     |                                                  |                                     |              |             |           |                                             |                                                                                             | D5_N(PF08706,1.2E-4,194-285)                                                   |
|    |          |        |        |     |                                                  |                                     |              |             |           |                                             |                                                                                             | P-loop containing nucleoside triphosphate hydrolases(SSF52540,2.2E-12,344-523) |
| 75 | 47,663   | 47,974 | 312    | 103 | hypothetical protein MPWG_00084                  | Micromonas pusilla virus PL1        | AET43573     | 41.90%      | 1.03E-04  | 74(12-85)                                   |                                                                                             |                                                                                |
|    | 48,029   | 49,471 | 1443   | 480 | hypothetical protein OtV6_168                    | Ostreococcus tauri virus RT-2011    | AFC35076     | 51.70%      | 1.86E-159 | 478(3-480)                                  | Capsid_NCLDV(pfam04451,6.50e-16,88,205-292;1.59e-34,117,360-476)                            | Capsid_NCLDV(PF04451,3.7E-58,205-476)                                          |
| 76 |          |        |        |     |                                                  |                                     |              |             |           |                                             |                                                                                             | Group II dsDNA viruses VP(SSF49749,3.0E-49,26-222;7.7E-45,223-480)             |
|    |          |        |        |     |                                                  |                                     |              |             |           |                                             |                                                                                             | African swine fever virus, p72, major capsid(2.70.9.20,2.5E-55,328-480)        |
| 77 | 49,556   | 50,914 | 1359   | 452 | hypothetical protein OIV1_167                    | Ostreococcus lucimarinus virus OIV1 | YP_004061799 | 62.30%      | 0         | 452(1-452)                                  | Capsid_NCLDV(pfam04451,4.80e-21,73,201-273;1.51e-34,100,349-448)                            | Capsid_NCLDV(PF04451,7.2E-66,200-448)                                          |

| ID | Position |        | Length |     | BlastP hit in GenBank nr and/or viruses data set |                         |              |             |          | NCBI conserved domain (ID, E-value, alignment length in aa, alignment start - end position) | Interproscan matches (ID, E-value, alignment start - end position) |                                                                         |
|----|----------|--------|--------|-----|--------------------------------------------------|-------------------------|--------------|-------------|----------|---------------------------------------------------------------------------------------------|--------------------------------------------------------------------|-------------------------------------------------------------------------|
|    | start    | end    | nt     | aa  | ORF, protein encoded, or mass                    | Species                 | Accession    | Aa identity | E Value  |                                                                                             |                                                                    | Alignment length in aa (Start-end position)                             |
|    |          |        |        |     |                                                  |                         |              |             |          |                                                                                             |                                                                    | Group II dsDNA viruses<br>VP(SSF49749,9.5E-56,25-222;1.9E-44,223-452)   |
|    |          |        |        |     |                                                  |                         |              |             |          |                                                                                             |                                                                    | African swine fever virus, p72, major capsid(2.70.9.20,7.1E-60,344-452) |
| 78 | 51,016   | 51,336 | 321    | 106 | S-adenosylmethionine decarboxylase proenzyme     | Desulfobacter postgatei | WP_004074803 | 41.60%      | 1.82E-16 | 77(20-96)                                                                                   | AdoMet_dc(cl00687,6.69e-28,78,19-96)                               | AdoMet_dc(PF02675,3.6E-25,16-105)                                       |
|    | 51,345   | 51,527 | 183    | 60  |                                                  |                         |              |             |          |                                                                                             |                                                                    | signal-peptide(SignalP-NN(euk),-1.0,1-21)                               |
| 79 |          |        |        |     |                                                  |                         |              |             |          |                                                                                             |                                                                    | transmembrane_regions(tmhmm , -1.0,5-27;37-55)                          |
| 80 | 51,548   | 51,913 | 366    | 121 |                                                  |                         |              |             |          |                                                                                             |                                                                    |                                                                         |
|    | 52,087   | 52,650 | 564    | 187 | hypothetical protein CHLNCDRAFT_138957           | Chlorella variabilis    | EFN52536     | 47.90%      | 2.80E-06 | 45(134-178)                                                                                 | RING(cl17238,8.28e-05,42,135-176)                                  | Zinc finger, RING/FYVE/PHD-type(3.30.40.10,3.2E-11,124-181)             |
| 81 |          |        |        |     |                                                  |                         |              |             |          |                                                                                             |                                                                    | zf-C3HC4_2(pfam13923,9.17e-08,42,133-174)                               |



| ID | Position |        | Length |     | BlastP hit in GenBank nr and/or viruses data set |                                      |              |             |          |                                             | NCBI conserved domain (ID, E-value, alignment length in aa, alignment start - end position) | Interproscan matches (ID, E-value, alignment start - end position)      |
|----|----------|--------|--------|-----|--------------------------------------------------|--------------------------------------|--------------|-------------|----------|---------------------------------------------|---------------------------------------------------------------------------------------------|-------------------------------------------------------------------------|
|    | start    | end    | nt     | aa  | ORF, protein encoded, or mass                    | Species                              | Accession    | Aa identity | E Value  | Alignment length in aa (Start-end position) |                                                                                             |                                                                         |
| 82 | 53,119   | 53,793 | 675    | 224 | hypothetical protein                             | Mesorhizobium sp. STM 4661           | WP_006332065 | 41.80%      | 3.11E-23 | 146(73-218)                                 |                                                                                             |                                                                         |
|    |          |        |        |     | putative nuclease                                | Moumouvirus Monve                    | AEX62994     | 32.40%      | 4.42E-20 | 219(3-221)                                  |                                                                                             |                                                                         |
| 83 | 53,812   | 54,624 | 813    | 270 | FAD-dependent thymidylate synthase               | Micromonas pusilla virus SP1         | AET85027     | 57.40%      | 3.74E-90 | 246(3-248)                                  | Thy1(cl03630,1.15e-86,213,1-213)                                                            | Thymidylate synthase-complementing protein Thy1(SSF69796,1.1E-63,1-215) |
|    |          |        |        |     | thymidylate synthase                             | Dictyostelium fasciculatum           | XP_004366976 | 52.10%      | 1.30E-84 | 252(2-253)                                  |                                                                                             |                                                                         |
| 84 | 54,647   | 54,991 | 345    | 114 | hypothetical protein                             | Marine Group II euryarchaeote        | WP_018035887 | 49.40%      | 3.10E-22 | 87(2-88)                                    | HNHc(cl00083,1.05e-05,51,20-70)                                                             | HNH nucleases(SM00507,0.0031,16-69)                                     |
|    |          |        |        |     | hypothetical protein crov535                     | Cafeteria roenbergensis virus BV-PW1 | YP_003970168 | 37.20%      | 3.00E-07 | 77(2-78)                                    |                                                                                             |                                                                         |
| 85 | 55,681   | 56,040 | 360    | 119 |                                                  |                                      |              |             |          |                                             |                                                                                             |                                                                         |
| 86 | 56,059   | 56,451 | 393    | 130 |                                                  |                                      |              |             |          |                                             |                                                                                             | CRAL-TRIO domain(3.40.525.10,7.5E-4,19-127)                             |
| 87 | 56,423   | 57,136 | 714    | 237 | conserved hypothetical protein                   | Culex quinquefasciatus               | XP_001846879 | 35.70%      | 8.75E-20 | 156(2-157)                                  | Glyco_transf_25(cl01298,1.89e-18,69,2-70)                                                   | Glyco_transf_25(PF01755,5.7E-17,2-97)                                   |
| 88 | 57,295   | 57,843 | 549    | 182 |                                                  |                                      |              |             |          |                                             |                                                                                             | signal-peptide(SignalP-NN(euk),-1.0,1-1)                                |

| ID | Position |        | Length |     | BlastP hit in GenBank nr and/or viruses data set |                                   |              |             |           |                                             | NCBI conserved domain (ID, E-value, alignment length in aa, alignment start - end position) | Interproscan matches (ID, E-value, alignment start - end position)         |
|----|----------|--------|--------|-----|--------------------------------------------------|-----------------------------------|--------------|-------------|-----------|---------------------------------------------|---------------------------------------------------------------------------------------------|----------------------------------------------------------------------------|
|    | start    | end    | nt     | aa  | ORF, protein encoded, or mass                    | Species                           | Accession    | Aa identity | E Value   | Alignment length in aa (Start-end position) |                                                                                             |                                                                            |
| 89 | 57,858   | 58,610 | 753    | 250 | hypothetical protein MpV1_186c                   | Micromonas sp. RCC1109 virus MpV1 | YP_004062069 | 26.80%      | 2.79E-12  | 151(3-153)                                  |                                                                                             | transmembrane_regions(tmhmm , -1.0,43-63;69-89)                            |
|    | 58,881   | 59,174 | 294    | 97  |                                                  |                                   |              |             |           |                                             |                                                                                             | signal-peptide(SignalP-NN(euk), -1.0,1-41)                                 |
| 90 |          |        |        |     |                                                  |                                   |              |             |           |                                             |                                                                                             | transmembrane_regions(tmhmm , -1.0,22-42)                                  |
| 91 | 59,191   | 59,481 | 291    | 96  | hypothetical protein PANDA_008648, partial       | Ailuropoda melanoleuca            | EFB28322     | 55.00%      | 7.13E-02  | 40(47-86)                                   |                                                                                             | signal-peptide(SignalP-NN(euk), -1.0,1-39)                                 |
|    |          |        |        |     |                                                  |                                   |              |             |           |                                             |                                                                                             | transmembrane_regions(tmhmm , -1.0,24-44)                                  |
| 92 | 59,496   | 60,473 | 978    | 325 | hypothetical protein OtV6_156c                   | Ostreococcus tauri virus RT-2011  | AFC35064     | 63.00%      | 4.46E-140 | 316(10-325)                                 | RNRR2(cd01049,6.54e-112,275,20-294)                                                         | RIBONUCLEOSIDE-DIPHOSPHATE REDUCTASE SMALL CHAIN(PTHR23409,1.1E-180,7-325) |
|    |          |        |        |     | ribonucleoside-diphosphate reductase             | Arabidopsis lyrata subsp. lyrata  | XP_002870664 | 59.90%      | 9.13E-136 | 316(10-325)                                 |                                                                                             | transmembrane_regions(tmhmm , -1.0,164-184)                                |

| ID | Position |        | Length |     | BlastP hit in GenBank nr and/or viruses data set |                                     |              |             |          |                                             | NCBI conserved domain (ID, E-value, alignment length in aa, alignment start - end position) | Interproscan matches (ID, E-value, alignment start - end position) |
|----|----------|--------|--------|-----|--------------------------------------------------|-------------------------------------|--------------|-------------|----------|---------------------------------------------|---------------------------------------------------------------------------------------------|--------------------------------------------------------------------|
|    | start    | end    | nt     | aa  | ORF, protein encoded, or mass                    | Species                             | Accession    | Aa identity | E Value  | Alignment length in aa (Start-end position) |                                                                                             |                                                                    |
| 93 | 60,516   | 60,815 | 300    | 99  |                                                  |                                     |              |             |          |                                             |                                                                                             | signal-peptide(SignalP-NN(euk),-1.0,1-20)                          |
|    |          |        |        |     |                                                  |                                     |              |             |          |                                             |                                                                                             | transmembrane_regions(tmhmm , -1.0,9-29)                           |
| 94 | 60,812   | 61,075 | 264    | 87  | hypothetical protein MPVG_00082                  | Micromonas pusilla virus 12T        | YP_007676150 | 36.00%      | 3.72E-05 | 50(11-60)                                   | DUF3671(pfam12420,3.55e-03,64,3-66)                                                         | signal-peptide(SignalP-NN(euk),-1.0,1-23)                          |
|    |          |        |        |     |                                                  |                                     |              |             |          |                                             |                                                                                             | transmembrane_regions(tmhmm , -1.0,10-28;42-60)                    |
| 95 | 61,090   | 61,395 | 306    | 101 | hypothetical protein OIV1_127c                   | Ostreococcus lucimarinus virus OIV1 | YP_004061760 | 56.50%      | 9.90E-10 | 46(14-59)                                   |                                                                                             | signal-peptide(SignalP-NN(euk),-1.0,1-20)                          |
|    |          |        |        |     |                                                  |                                     |              |             |          |                                             |                                                                                             | transmembrane_regions(tmhmm , -1.0,10-32;42-62)                    |
| 96 | 61,429   | 63,357 | 1929   | 642 |                                                  |                                     |              |             |          |                                             |                                                                                             |                                                                    |
| 97 | 63,435   | 64,373 | 939    | 312 |                                                  |                                     |              |             |          |                                             |                                                                                             |                                                                    |
| 98 | 64,448   | 65,128 | 681    | 226 | hypothetical protein MPVG_00083                  | Micromonas pusilla virus 12T        | YP_007676151 | 45.70%      | 9.96E-48 | 203(1-203)                                  |                                                                                             |                                                                    |
| 99 | 65,175   | 67,232 | 2058   | 685 | hypothetical protein OtV6_148c                   | Ostreococcus tauri virus RT-2011    | AFC35056     | 29.00%      | 2.13E-13 | 278(255-532)                                | PKc_like(cl09925,1.18e-12,184,161-344)                                                      | Pkinase(PF00069,3.0E-13,159-344)                                   |
|    |          |        |        |     | putative protein kinase, fragment,               | Trypanosoma vivax Y486              | CCC49202     | 31.40%      | 4.94E-06 | 169(161-329)                                |                                                                                             |                                                                    |

| ID  | Position |        | Length |     | BlastP hit in GenBank nr and/or viruses data set |                                    |              |             |          |                                             | NCBI conserved domain (ID, E-value, alignment length in aa, alignment start - end position) | Interproscan matches (ID, E-value, alignment start - end position) |  |
|-----|----------|--------|--------|-----|--------------------------------------------------|------------------------------------|--------------|-------------|----------|---------------------------------------------|---------------------------------------------------------------------------------------------|--------------------------------------------------------------------|--|
|     | start    | end    | nt     | aa  | ORF, protein encoded, or mass                    | Species                            | Accession    | Aa identity | E Value  | Alignment length in aa (Start-end position) |                                                                                             |                                                                    |  |
|     |          |        |        |     | partial                                          |                                    |              |             |          |                                             |                                                                                             |                                                                    |  |
|     | 67,241   | 67,525 | 285    | 94  | hypothetical protein H665_p144                   | Ostreococcus tauri virus 1         | YP_003212967 | 30.10%      | 1.06E-07 | 92(3-94)                                    | Thioredoxin_like(cl00388,2.68e-08,59,35-93)                                                 | Thioredoxin-like(SSF52833,1.2E-8,34-93)                            |  |
| 100 |          |        |        |     | hypothetical protein                             | Methylophilus methylotrophus       | WP_018987379 | 34.00%      | 1.14E-07 | 93(1-93)                                    |                                                                                             | signal-peptide(SignalP-NN(euk),-1.0,1-25)                          |  |
|     |          |        |        |     |                                                  |                                    |              |             |          |                                             |                                                                                             | transmembrane_regions(tmhmm , -1.0,5-27)                           |  |
|     | 67,560   | 67,763 | 204    | 67  | hypothetical protein MpV1_149                    | Micromonas sp. RCC1109 virus MpV1  | YP_004062032 | 33.30%      | 3.38E-06 | 66(1-66)                                    |                                                                                             | signal-peptide(SignalP-NN(euk),-1.0,1-36)                          |  |
| 101 |          |        |        |     |                                                  |                                    |              |             |          |                                             |                                                                                             | transmembrane_regions(tmhmm , -1.0,15-35)                          |  |
|     | 67,804   | 68,670 | 867    | 288 | hypothetical protein BpV1_139c                   | Bathycoccus sp. RCC1105 virus BpV1 | YP_004061569 | 38.90%      | 4.74E-40 | 242(42-283)                                 | Chalcone(cl03589,6.49e-03,76,174-249)                                                       |                                                                    |  |
| 102 |          |        |        |     | hypothetical protein VOLCADRAFT_119457           | Volvox carteri f. nagariensis      | XP_002956623 | 25.00%      | 1.11E-04 | 226(60-285)                                 |                                                                                             |                                                                    |  |
|     | 68,657   | 69,148 | 492    | 163 | hypothetical protein OsV5_164f                   | Ostreococcus virus OsV5            | YP_001648241 | 30.00%      | 3.05E-12 | 129(34-162)                                 | RING(cl17238,5.82e-08,47,34-80)                                                             | RING/U-box(SSF57850,8.0E-13,27-98)                                 |  |
| 103 |          |        |        |     | uncharacterized protein LOC100303800             | Zea mays                           | NP_001158906 | 46.30%      | 1.01E-07 | 52(32-83)                                   |                                                                                             |                                                                    |  |

| ID  | Position |        | Length |     | BlastP hit in GenBank nr and/or viruses data set |                                     |                    |             |          |                                             | NCBI conserved domain (ID, E-value, alignment length in aa, alignment start - end position) | Interproscan matches (ID, E-value, alignment start - end position) |  |
|-----|----------|--------|--------|-----|--------------------------------------------------|-------------------------------------|--------------------|-------------|----------|---------------------------------------------|---------------------------------------------------------------------------------------------|--------------------------------------------------------------------|--|
|     | start    | end    | nt     | aa  | ORF, protein encoded, or mass                    | Species                             | Accession          | Aa identity | E Value  | Alignment length in aa (Start-end position) |                                                                                             |                                                                    |  |
|     |          |        |        |     | PREDICTED: LOW QUALITY                           |                                     |                    |             |          |                                             |                                                                                             |                                                                    |  |
| 104 | 69,185   | 69,520 | 336    | 111 | PROTEIN: ubiquitin-protein ligase synoviolin     | E3 Cavia porcellus                  | XP_005003028       | 45.70%      | 1.50E-08 | 46(27-72)                                   | RING(c117238,1.12e-06,41,30-70)                                                             | RING/U-box(SSF57850,8.1E-16,24-93)                                 |  |
| 105 | 69,414   | 70,070 | 657    | 218 | kinase protein                                   | Paramecium bursaria virus NE-JV-1   | Chlorella AGE56325 | 36.80%      | 1.35E-25 | 181(1-181)                                  | NK(c117190,1.37e-31,166,2-167)                                                              | Deoxynucleoside kinase(PIRSF000705,1.4E-11,1-189)                  |  |
|     |          |        |        |     | deoxynucleoside kinase                           | Prevotella sp. CAG:474              | CDC97404           | 35.20%      | 6.61E-19 | 165(3-167)                                  | COG1428(COG1428,6.21e-18,182,1-182)                                                         |                                                                    |  |
| 106 | 70,328   | 71,125 | 798    | 265 | hypothetical protein OMVG_00121                  | Ostreococcus lucimarinus virus OIV3 | AFK66121           | 50.90%      | 8.76E-86 | 262(2-263)                                  | TBP_TLF(c108263,8.16e-07,167,58-224)                                                        | TATA-box binding protein-like(SSF55945,1.5E-11,135-230)            |  |
| 107 | 71,176   | 73,824 | 2649   | 882 | hypothetical protein GUITHDRAFT_160489           | Guillardia theta                    | CCMP2712           | 27.50%      | 3.02E-07 | 126(96-221)                                 |                                                                                             |                                                                    |  |
| 108 | 73,872   | 75,308 | 1437   | 478 | hypothetical protein MpV1_136                    | Micromonas sp. RCC1109 virus MpV1   | YP_004062019       | 56.50%      | 0        | 473(4-476)                                  | DEXDc(c117251,3.57e-15,131,31-161)                                                          | helicase superfamily c-terminal domain(SM00490,4.8E-22,324-407)    |  |

| ID  | Position |        | Length |    | BlastP hit in GenBank nr and/or viruses data set |                              |           |             |          | NCBI conserved domain (ID, E-value, alignment length in aa, alignment start - end position) | Interproscan matches (ID, E-value, alignment start - end position) |                                                                                                                      |
|-----|----------|--------|--------|----|--------------------------------------------------|------------------------------|-----------|-------------|----------|---------------------------------------------------------------------------------------------|--------------------------------------------------------------------|----------------------------------------------------------------------------------------------------------------------|
|     | start    | end    | nt     | aa | ORF, protein encoded, or mass                    | Species                      | Accession | Aa identity | E Value  |                                                                                             |                                                                    | Alignment length in aa (Start-end position)                                                                          |
|     |          |        |        |    |                                                  |                              |           |             |          |                                                                                             | HELICc(c117351,3.00e-23,121,294-414)                               | DEAD-like helicases superfamily(SM00487,3.8E-26,5-189)                                                               |
|     |          |        |        |    |                                                  |                              |           |             |          |                                                                                             | SNF2_N(pfam00176,1.98e-52,258,12-269)                              | SWI/SNF-RELATED MATRIX-ASSOCIATED ACTIN-DEPENDENT REGULATOR OF CHROMATIN SUBFAMILY-RELATED(PTHR10799,5.3E-99,11-476) |
| 109 | 75,315   | 75,557 | 243    | 80 | hypothetical protein MPXG_00060                  | Micromonas pusilla virus SP1 | AET84858  | 53.80%      | 4.95E-04 | 58(4-61)                                                                                    | SrmB(COG0513,2.02e-07,117,293-409)                                 |                                                                                                                      |
|     |          |        |        |    | EsV-1-52                                         | Ectocarpus siliculosus       | CBN80356  | 58.10%      | 9.63E-02 | 42(4-45)                                                                                    |                                                                    |                                                                                                                      |
|     | 75,565   | 75,789 | 225    | 74 |                                                  |                              |           |             |          |                                                                                             |                                                                    | signal-peptide(SignalP-NN(euk),-1.0,1-23)                                                                            |
| 110 |          |        |        |    |                                                  |                              |           |             |          |                                                                                             |                                                                    | transmembrane_regions(tmhmm , -1.0,10-32;47-67)                                                                      |

| ID  | Position |        | Length |     | BlastP hit in GenBank nr and/or viruses data set |                                     |              |             |          |                                             |                                      | NCBI conserved domain (ID, E-value, alignment length in aa, alignment start - end position) | Interproscan matches (ID, E-value, alignment start - end position) |
|-----|----------|--------|--------|-----|--------------------------------------------------|-------------------------------------|--------------|-------------|----------|---------------------------------------------|--------------------------------------|---------------------------------------------------------------------------------------------|--------------------------------------------------------------------|
|     | start    | end    | nt     | aa  | ORF, protein encoded, or mass                    | Species                             | Accession    | Aa identity | E Value  | Alignment length in aa (Start-end position) |                                      |                                                                                             |                                                                    |
| 111 | 75,909   | 76,265 | 357    | 118 |                                                  |                                     |              |             |          |                                             |                                      |                                                                                             |                                                                    |
| 112 | 76,324   | 76,854 | 531    | 176 | hypothetical protein OIV1_144                    | Ostreococcus lucimarinus virus OIV1 | YP_004061777 | 26.30%      | 1.09E-05 | 121(27-147)                                 |                                      |                                                                                             |                                                                    |
| 113 | 76,866   | 77,462 | 597    | 198 |                                                  |                                     |              |             |          |                                             |                                      |                                                                                             |                                                                    |
| 114 | 77,451   | 77,879 | 429    | 142 |                                                  |                                     |              |             |          |                                             |                                      |                                                                                             |                                                                    |
| 115 | 77,879   | 78,049 | 171    | 56  | hypothetical protein PGCG_00053                  | Phaeocystis globosa virus           | YP_008052372 | 62.50%      | 1.14E-11 | 56(1-56)                                    |                                      |                                                                                             |                                                                    |
| 116 | 78,069   | 80,354 | 2286   | 761 | hypothetical protein OtV6_135c                   | Ostreococcus tauri virus RT-2011    | AFC35043     | 61.70%      | 0        | 749(1-749)                                  | ATP-cone(pfam03477,4.86e-07,90,1-90) | RIBONUCLEOSIDE-DIPHOSPHATE REDUCTASE LARGE CHAIN(PTHR11573,0.0,1-759)                       |                                                                    |
|     |          |        |        |     | hypothetical protein                             | Monosiga brevicollis MX1            | XP_001746543 | 55.60%      | 0        | 761(1-761)                                  | RNR_PFL(cI09939,0,571,152-722)       | PFL-like glycy radical enzymes(SSF51998,6.1E-185,200-733)                                   |                                                                    |
|     |          |        |        |     |                                                  |                                     |              |             |          |                                             | PLN02437(PLN02437,0,760,1-760)       |                                                                                             |                                                                    |
| 117 | 80,394   | 80,777 | 384    | 127 | hypothetical protein OLNG_00118                  | Ostreococcus lucimarinus virus OIV5 | YP_007674760 | 47.20%      | 1.51E-26 | 123(4-126)                                  |                                      |                                                                                             |                                                                    |
| 118 | 80,778   | 81,029 | 252    | 83  |                                                  |                                     |              |             |          |                                             |                                      | signal-peptide(SignalP-NN(euk),-1.0,1-32)                                                   |                                                                    |

| ID  | Position |        | Length |     | BlastP hit in GenBank nr and/or viruses data set |                                  |              |             |          | NCBI conserved domain (ID, E-value, alignment length in aa, alignment start - end position) | Interproscan matches (ID, E-value, alignment start - end position) |                                                        |
|-----|----------|--------|--------|-----|--------------------------------------------------|----------------------------------|--------------|-------------|----------|---------------------------------------------------------------------------------------------|--------------------------------------------------------------------|--------------------------------------------------------|
|     | start    | end    | nt     | aa  | ORF, protein encoded, or mass                    | Species                          | Accession    | Aa identity | E Value  |                                                                                             |                                                                    | Alignment length in aa (Start-end position)            |
|     |          |        |        |     |                                                  |                                  |              |             |          |                                                                                             |                                                                    | transmembrane_regions(tmhmm , -1.0,10-30;59-79)        |
| 119 | 81,053   | 81,280 | 228    | 75  |                                                  |                                  |              |             |          |                                                                                             |                                                                    | signal-peptide(SignalP-NN(euk), -1.0,1-20)             |
|     |          |        |        |     |                                                  |                                  |              |             |          |                                                                                             |                                                                    | transmembrane_regions(tmhmm , -1.0,9-29;43-63)         |
| 120 | 81,304   | 81,621 | 318    | 105 | hypothetical protein OtV6_138                    | Ostreococcus tauri virus RT-2011 | AFC35046     | 69.40%      | 3.30E-40 | 98(1-98)                                                                                    | NTP-PPase(cl16941,6.38e-11,73,11-83)                               | MazG(PF03819,1.5E-6,29-95)                             |
|     |          |        |        |     | hypothetical protein                             | Flexithrix dorotheae             | WP_020533483 | 31.30%      | 3.09E-10 | 99(1-99)                                                                                    |                                                                    | all-alpha NTP pyrophosphatases(SSF101386,1.6E-14,1-96) |
| 121 | 81,614   | 82,087 | 474    | 157 |                                                  |                                  |              |             |          |                                                                                             |                                                                    | transmembrane_regions(tmhmm , -1.0,137-155)            |
| 122 | 82,068   | 82,292 | 225    | 74  |                                                  |                                  |              |             |          |                                                                                             |                                                                    | Zinc finger, AN1-type(4.10.1110.10,2.4E-4,17-70)       |
| 123 | 82,246   | 82,983 | 738    | 245 | hypothetical protein MPWG_00120                  | Micromonas pusilla virus PL1     | AET43608     | 53.60%      | 1.57E-57 | 191(15-205)                                                                                 | YqaJ(cl09232,1.06e-31,125,29-153)                                  | Restriction endonuclease-like(SSF52980,1.2E-45,5-203)  |





| ID  | Position |        | Length |     | BlastP hit in GenBank nr and/or viruses data set |                                                    |              |             |          |                                             | NCBI conserved domain (ID, E-value, alignment length in aa, alignment start - end position) | Interproscan matches (ID, E-value, alignment start - end position) |
|-----|----------|--------|--------|-----|--------------------------------------------------|----------------------------------------------------|--------------|-------------|----------|---------------------------------------------|---------------------------------------------------------------------------------------------|--------------------------------------------------------------------|
|     | start    | end    | nt     | aa  | ORF, protein encoded, or mass                    | Species                                            | Accession    | Aa identity | E Value  | Alignment length in aa (Start-end position) |                                                                                             |                                                                    |
| 131 | 86,973   | 87,767 | 795    | 264 | hypothetical protein MPXG_00049                  | Micromonas pusilla virus SP1                       | AET84847     | 37.40%      | 1.53E-39 | 257(2-258)                                  | Patatin_and_cPLA2(c111396,7.32e-09,117,59-175)                                              | Patatin(PF01734,2.5E-12,10-181)                                    |
|     |          |        |        |     | patatin-like phospholipase protein family        | uncultured bacterium                               | EKD54247     | 23.60%      | 5.63E-11 | 244(15-258)                                 |                                                                                             | FabD/lysophospholipase-like(SSF52151,1.7E-21,1-186)                |
| 132 | 87,780   | 88,196 | 417    | 138 | hypothetical protein OtV6_119c                   | Ostreococcus tauri virus RT-2011                   | AFC35027     | 42.00%      | 8.28E-06 | 67(64-130)                                  |                                                                                             |                                                                    |
| 133 | 88,193   | 88,522 | 330    | 109 |                                                  |                                                    |              |             |          |                                             |                                                                                             |                                                                    |
| 134 | 88,586   | 89,890 | 1305   | 434 |                                                  |                                                    |              |             |          |                                             |                                                                                             | transmembrane_regions(tmhmm , -1.0,59-79)                          |
| 135 | 89,944   | 90,333 | 390    | 129 | hypothetical protein BpV1_099c                   | Bathycoccus sp. RCC1105 virus BpV1                 | YP_004061529 | 53.50%      | 5.18E-30 | 101(4-104)                                  | PDDEXK_3(c116254,2.08e-28,88,16-103)                                                        | PDDEXK_3(PF13366,3.1E-29,7-108)                                    |
|     |          |        |        |     | hypothetical protein                             | candidate division DUSEL4 archaeon SCGC AAA011-L22 | WP_018203135 | 43.70%      | 1.02E-19 | 99(6-104)                                   |                                                                                             |                                                                    |
| 136 | 90,335   | 91,243 | 909    | 302 | hypothetical protein OMVG_00153                  | Ostreococcus lucimarinus virus OIV3                | AFK66153     | 52.20%      | 2.17E-90 | 293(10-302)                                 | Pox_VLTF3(pfam04947,1.84e-56,74,128-301)                                                    | Pox_VLTF3(PF04947,4.0E-53,130-300)                                 |
| 137 | 91,267   | 92,007 | 741    | 246 | hypothetical protein BpV2_095                    | Bathycoccus sp. RCC1105 virus BpV2                 | ADQ91262     | 55.30%      | 7.93E-84 | 244(1-244)                                  | PCNA(cd00577,8.07e-44,242,4-245)                                                            | PROLIFERATING CELL NUCLEAR ANTIGEN(PTHR11352,5.9E-50,6-245)        |
|     |          |        |        |     | hypothetical protein                             | Verrucomicrobia bacterium SCGC                     | WP_020036354 | 54.50%      | 8.71E-83 | 244(1-244)                                  | PHA03383(PHA03383,2.46e-80,244,1-244)                                                       |                                                                    |

| ID  | Position |        | Length |     | BlastP hit in GenBank nr and/or viruses data set |                                     |              |             |          |                                             | NCBI conserved domain (ID, E-value, alignment length in aa, alignment start - end position) | Interproscan matches (ID, E-value, alignment start - end position) |
|-----|----------|--------|--------|-----|--------------------------------------------------|-------------------------------------|--------------|-------------|----------|---------------------------------------------|---------------------------------------------------------------------------------------------|--------------------------------------------------------------------|
|     | start    | end    | nt     | aa  | ORF, protein encoded, or mass                    | Species                             | Accession    | Aa identity | E Value  | Alignment length in aa (Start-end position) |                                                                                             |                                                                    |
|     |          |        |        |     |                                                  | AAA164-N20                          |              |             |          |                                             |                                                                                             |                                                                    |
| 138 | 92,032   | 92,433 | 402    | 133 | hypothetical protein MPVG_00121                  | Micromonas pusilla virus 12T        | YP_007676187 | 47.80%      | 8.36E-35 | 127(1-127)                                  |                                                                                             |                                                                    |
|     | 92,499   | 93,029 | 531    | 176 | bacteriocin ABC transporter putative             | Clostridium perfringens SM101       | YP_697983    | 31.20%      | 3.41E-02 | 75(1-75)                                    |                                                                                             | signal-peptide(SignalP-NN(euk),-1.0,1-24)                          |
| 139 |          |        |        |     |                                                  |                                     |              |             |          |                                             |                                                                                             | transmembrane_regions(tmhmm , -1.0,5-23)                           |
|     | 93,061   | 93,453 | 393    | 130 | hypothetical protein OIV1_108c                   | Ostreococcus lucimarinus virus OIV1 | YP_004061741 | 34.70%      | 5.66E-18 | 121(5-125)                                  |                                                                                             |                                                                    |
| 140 |          |        |        |     | hypothetical protein                             | Verrucomicrobia bacterium SCGC      | WP_020036584 | 32.50%      | 4.75E-14 | 121(5-125)                                  |                                                                                             |                                                                    |
|     |          |        |        |     |                                                  | AAA164-N20                          |              |             |          |                                             |                                                                                             |                                                                    |
| 141 | 93,474   | 94,280 | 807    | 268 | hypothetical protein BpV2_091c                   | Bathycoccus sp. RCC1105 virus BpV2  | ADQ91258     | 37.00%      | 1.64E-35 | 230(1-230)                                  |                                                                                             |                                                                    |
|     | 94,307   | 94,522 | 216    | 71  | hypothetical protein MPWG_00152                  | Micromonas pusilla virus PL1        | AET43639     | 46.40%      | 1.50E-10 | 65(1-65)                                    |                                                                                             | transmembrane_regions(tmhmm , -1.0,9-27)                           |
| 142 |          |        |        |     |                                                  | Verrucomicrobia bacterium SCGC      | WP_020036352 | 47.50%      | 1.06E-08 | 59(2-60)                                    |                                                                                             |                                                                    |
|     |          |        |        |     |                                                  | AAA164-N20                          |              |             |          |                                             |                                                                                             |                                                                    |
| 143 | 94,553   | 95,098 | 546    | 181 | hypothetical protein BpV1_089c                   | Bathycoccus sp. RCC1105 virus BpV1  | YP_004061519 | 45.30%      | 5.51E-30 | 148(1-148)                                  |                                                                                             |                                                                    |

| ID  | Position |         | Length |     | BlastP hit in GenBank nr and/or viruses data set |                                 |                      |             |          |                                             | NCBI conserved domain (ID, E-value, alignment length in aa, alignment start - end position) | Interproscan matches (ID, E-value, alignment start - end position)      |
|-----|----------|---------|--------|-----|--------------------------------------------------|---------------------------------|----------------------|-------------|----------|---------------------------------------------|---------------------------------------------------------------------------------------------|-------------------------------------------------------------------------|
|     | start    | end     | nt     | aa  | ORF, protein encoded, or mass                    | Species                         | Accession            | Aa identity | E Value  | Alignment length in aa (Start-end position) |                                                                                             |                                                                         |
| 144 | 95,071   | 96,039  | 969    | 322 | hypothetical protein                             | Verrucomicrobia<br>bacterium    | SCGC<br>WP_020036351 | 45.30%      | 8.51E-30 | 148(1-148)                                  |                                                                                             |                                                                         |
|     |          |         |        |     |                                                  | AAA164-N20                      |                      |             |          |                                             |                                                                                             |                                                                         |
| 145 | 96,030   | 97,133  | 1104   | 367 | hypothetical protein                             | Micromonas sp.<br>RCC1109 virus | YP_004061981         | 30.20%      | 1.08E-28 | 359(2-360)                                  |                                                                                             | signal-peptide(SignalP-NN(euk),-1.0,1-15)                               |
|     |          |         |        |     | MpV1_098c                                        | MpV1                            |                      |             |          |                                             |                                                                                             |                                                                         |
| 146 | 97,156   | 98,331  | 1176   | 391 | hypothetical protein                             | Verrucomicrobia<br>bacterium    | SCGC<br>WP_020036348 | 28.70%      | 4.79E-20 | 352(8-359)                                  |                                                                                             |                                                                         |
|     |          |         |        |     | MPVG_00151                                       | Micromonas pusilla virus 12T    | YP_007676216         | 42.90%      | 2.21E-92 | 391(1-391)                                  | Capsid_NCLDV(pfam04451,5.49e-22,188,200-387)                                                | Capsid_NCLDV(PF04451,4.6E-21,200-387)                                   |
| 147 | 98,369   | 99,610  | 1242   | 413 | hypothetical protein                             | Verrucomicrobia<br>bacterium    | SCGC<br>WP_020036256 | 39.60%      | 3.84E-82 | 391(1-391)                                  |                                                                                             | Group II dsDNA viruses<br>VP(SSF49749,1.2E-37,25-217;8.2E-13,218-391)   |
|     |          |         |        |     |                                                  | AAA164-N20                      |                      |             |          |                                             |                                                                                             |                                                                         |
| 148 | 99,553   | 100,425 | 873    | 290 | hypothetical protein                             | Coccomyxa<br>subellipsoidea     | C-<br>EIE26852       | 40.90%      | 1.52E-46 | 217(55-271)                                 |                                                                                             | African swine fever virus, p72, major capsid(2.70.9.20,1.9E-18,248-391) |
| 149 | 100,594  | 100,863 | 270    | 89  |                                                  |                                 |                      |             |          |                                             |                                                                                             | PRK06943(PRK06943,9.69e-03,24,54-77)                                    |

| ID  | Position |         | Length |     | BlastP hit in GenBank nr and/or viruses data set |                    |              |              |              |                                             | NCBI conserved domain (ID, E-value, alignment length in aa, alignment start - end position) | Interproscan matches (ID, E-value, alignment start - end position)           |                                                                              |
|-----|----------|---------|--------|-----|--------------------------------------------------|--------------------|--------------|--------------|--------------|---------------------------------------------|---------------------------------------------------------------------------------------------|------------------------------------------------------------------------------|------------------------------------------------------------------------------|
|     | start    | end     | nt     | aa  | ORF, protein encoded, or mass                    | Species            | Accession    | Aa identity  | E Value      | Alignment length in aa (Start-end position) |                                                                                             |                                                                              |                                                                              |
| 150 | 100,886  | 101,956 | 1071   | 356 | hypothetical protein MpV1_083                    | Micromonas sp.     | RCC1109      | YP_004061966 | 35.90%       | 1.07E-51                                    | 282(12-293)                                                                                 | Herpes_UL52 super family(c117300,1.98e-03,39,238-276)                        | Herpes_UL52(PF03121,4.4E-8,239-276)                                          |
|     |          |         |        |     |                                                  | Verrucomicrobia    | bacterium    | SCGC         | WP_020036261 | 35.70%                                      | 2.16E-48                                                                                    | 278(16-293)                                                                  |                                                                              |
| 151 | 102,175  | 102,564 | 390    | 129 |                                                  |                    |              |              |              |                                             |                                                                                             |                                                                              |                                                                              |
| 152 | 102,788  | 103,066 | 279    | 92  |                                                  |                    |              |              |              |                                             |                                                                                             | signal-peptide(SignalP-NN(euk),-1.0,1-27)                                    |                                                                              |
|     |          |         |        |     |                                                  |                    |              |              |              |                                             |                                                                                             | transmembrane_regions(tmhmm , -1.0,5-23)                                     |                                                                              |
| 153 | 103,088  | 103,705 | 618    | 205 | hypothetical protein OtV2_075                    | Ostreococcus tauri | YP_004063508 | 62.60%       | 1.76E-68     | 199(3-201)                                  | PRK13435 ( PRK13435,1.92e-04,43,25-67)                                                      | S-adenosyl-L-methionine-dependent methyltransferases(SSF53335,3.2E-23,9-220) |                                                                              |
|     |          |         |        |     |                                                  | Verrucomicrobia    | bacterium    | SCGC         | WP_020036266 | 64.40%                                      | 2.20E-63                                                                                    |                                                                              | 177(1-177)                                                                   |
| 154 | 103,739  | 104,407 | 669    | 222 | hypothetical protein BpV1_072                    | Bathycoccus sp.    | RCC1105      | YP_004061502 | 43.20%       | 9.32E-52                                    | 220(1-220)                                                                                  | AdoMet_MTases(cd02440,3.63e-06,100,26-125)                                   | S-adenosyl-L-methionine-dependent methyltransferases(SSF53335,3.2E-23,9-220) |
|     |          |         |        |     |                                                  | Verrucomicrobia    | bacterium    | SCGC         | WP_020036272 | 42.30%                                      | 4.92E-50                                                                                    | 220(1-220)                                                                   |                                                                              |

| ID  | Position |         | Length |     | BlastP hit in GenBank nr and/or viruses data set |                                           |              |             |           |                                             | NCBI conserved domain (ID, E-value, alignment length in aa, alignment start - end position) | Interproscan matches (ID, E-value, alignment start - end position) |
|-----|----------|---------|--------|-----|--------------------------------------------------|-------------------------------------------|--------------|-------------|-----------|---------------------------------------------|---------------------------------------------------------------------------------------------|--------------------------------------------------------------------|
|     | start    | end     | nt     | aa  | ORF, protein encoded, or mass                    | Species                                   | Accession    | Aa identity | E Value   | Alignment length in aa (Start-end position) |                                                                                             |                                                                    |
| 155 | 104,326  | 104,844 | 519    | 172 | hypothetical protein MPXG_00018                  | Micromonas pusilla virus SP1              | AET84816     | 44.60%      | 8.03E-33  | 138(34-171)                                 | WLM super family(cl07077,1.68e-03,53,96-148)                                                | transmembrane_regions(tmhmm , -1.0,26-46)                          |
|     |          |         |        |     | hypothetical protein                             | Verrucomicrobia bacterium SCGC AAA164-N20 | WP_020036273 | 40.80%      | 3.63E-25  | 124(48-171)                                 |                                                                                             | WLM(PF08325,3.4E-6,94-150)                                         |
| 156 | 104,915  | 105,421 | 507    | 168 | hypothetical protein BpV1_077c                   | Bathycoccus sp. RCC1105 virus BpV1        | YP_004061507 | 39.10%      | 3.55E-18  | 127(37-163)                                 |                                                                                             | transmembrane_regions(tmhmm , -1.0,105-123;142-160)                |
| 157 | 105,529  | 106,467 | 939    | 312 | hypothetical protein MPVG_00136                  | Micromonas pusilla virus 12T              | YP_007676201 | 64.40%      | 7.74E-128 | 259(52-310)                                 |                                                                                             |                                                                    |
|     |          |         |        |     | hypothetical protein                             | Verrucomicrobia bacterium SCGC AAA164-N20 | WP_020036342 | 67.50%      | 1.19E-126 | 236(52-287)                                 | AAA(smart00382,5.35e-03,117,68-185)                                                         | no description(3.40.50.300,2.0E-5,68-186)                          |
| 158 | 106,419  | 108,401 | 1983   | 660 | hypothetical protein MPWG_00161                  | Micromonas pusilla virus PL1              | AET43648     | 45.10%      | 3.82E-11  | 99(3-101)                                   |                                                                                             |                                                                    |
|     |          |         |        |     | hypothetical protein                             | Verrucomicrobia bacterium SCGC AAA164-N20 | WP_020036343 | 50.60%      | 7.27E-10  | 76(3-78)                                    |                                                                                             | Group II dsDNA viruses VP(SSF49749,4.0E-8,25-82)                   |
| 159 | 108,898  | 109,215 | 318    | 105 | major capsid protein                             | Ostreococcus tauri virus 2                | YP_004063519 | 36.60%      | 3.31E-11  | 99(1-99)                                    | Capsid_NCLDV(pfam04451,1.63e-18,96,1-96)                                                    | Capsid_NCLDV(PF04451,8.7E-21,2-96)                                 |
|     |          |         |        |     |                                                  |                                           |              |             |           |                                             |                                                                                             | Group II dsDNA viruses VP(SSF49749,7.1E-20,1-100)                  |

| ID  | Position |         | Length |     | BlastP hit in GenBank nr and/or viruses data set |                                           |              |             |          |                                             | NCBI conserved domain (ID, E-value, alignment length in aa, alignment start - end position) | Interproscan matches (ID, E-value, alignment start - end position)      |
|-----|----------|---------|--------|-----|--------------------------------------------------|-------------------------------------------|--------------|-------------|----------|---------------------------------------------|---------------------------------------------------------------------------------------------|-------------------------------------------------------------------------|
|     | start    | end     | nt     | aa  | ORF, protein encoded, or mass                    | Species                                   | Accession    | Aa identity | E Value  | Alignment length in aa (Start-end position) |                                                                                             |                                                                         |
| 160 | 109,293  | 110,480 | 1188   | 395 | hypothetical protein MPXG_00023                  | Micromonas pusilla virus SP1              | AET84821     | 31.10%      | 9.79E-44 | 383(1-383)                                  | Capsid_NCLDV(pfam04451,1.85e-21,285,199-383)                                                | African swine fever virus, p72, major capsid(2.70.9.20,2.0E-22,2-99)    |
|     |          |         |        |     | hypothetical protein                             | Verrucomicrobia bacterium SCGC AAA164-N20 | WP_020036343 | 29.50%      | 3.05E-29 | 383(1-383)                                  | Group II dsDNA viruses VP(SSSF49749,1.4E-25,24-217;1.2E-20,218-391)                         |                                                                         |
| 161 | 110,508  | 110,891 | 384    | 127 | hypothetical protein H665_p095                   | Ostreococcus tauri virus 1                | YP_003212918 | 49.10%      | 2.22E-23 | 116(8-123)                                  |                                                                                             | African swine fever virus, p72, major capsid(2.70.9.20,4.6E-26,224-390) |
|     |          |         |        |     | hypothetical protein                             | Verrucomicrobia bacterium SCGC AAA164-N20 | WP_020036345 | 48.30%      | 7.76E-21 | 117(7-123)                                  |                                                                                             |                                                                         |
| 162 | 110,987  | 111,394 | 408    | 135 | hypothetical protein MPXG_00025                  | Micromonas pusilla virus SP1              | AET84823     | 58.00%      | 6.13E-23 | 88(46-133)                                  | transmembrane_regions(tmhmm                                                                 | ,-1.0,61-81;95-113)                                                     |

| ID  | Position |         | Length |      | BlastP hit in GenBank nr and/or viruses data set |                                   |              |             |          | NCBI conserved domain (ID, E-value, alignment length in aa, alignment start - end position) | Interproscan matches (ID, E-value, alignment start - end position) |                                                        |
|-----|----------|---------|--------|------|--------------------------------------------------|-----------------------------------|--------------|-------------|----------|---------------------------------------------------------------------------------------------|--------------------------------------------------------------------|--------------------------------------------------------|
|     | start    | end     | nt     | aa   | ORF, protein encoded, or mass                    | Species                           | Accession    | Aa identity | E Value  |                                                                                             |                                                                    | Alignment length in aa (Start-end position)            |
| 163 | 111,411  | 112,424 | 1014   | 337  | hypothetical protein                             | Verrucomicrobia<br>bacterium SCGC | WP_020036346 | 52.00%      | 4.76E-17 | 99(35-133)                                                                                  |                                                                    |                                                        |
|     |          |         |        |      | AAA164-N20                                       | Bathycoccus sp.<br>RCC1105 virus  | ADQ91252     | 35.70%      | 1.28E-07 | 110(1-110)                                                                                  |                                                                    | transmembrane_regions(tmhmm , -1.0,302-322)            |
|     |          |         |        |      | BpV2_085c                                        | BpV2                              |              |             |          |                                                                                             |                                                                    |                                                        |
| 164 | 112,443  | 112,751 | 309    | 102  | hypothetical protein                             | Verrucomicrobia<br>bacterium SCGC | WP_020036347 | 32.40%      | 6.62E-05 | 138(1-138)                                                                                  |                                                                    |                                                        |
| 165 | 112,756  | 114,213 | 1458   | 485  | hypothetical protein                             | uncultured<br>bacterium (gcode 4) | EKD30474     | 39.10%      | 2.71E-13 | 110(355-464)                                                                                | Peptidase_S74(pfam13884,1.65e-15,46,348-393)                       | HYPOTHETICAL<br>PROTEIN(PTHR13029:SF12,1.4E-5,348-406) |
|     |          |         |        |      | ACD_78C00046G00<br>01, partial                   | Micromonas sp.<br>RCC1109 virus   | YP_004061956 | 38.60%      | 3.97E-13 | 131(299-429)                                                                                | Peptidase_S74(PF13884,4.4E-19,348-401)                             |                                                        |
| 166 | 114,228  | 118,256 | 4029   | 1342 | hypothetical protein                             | MpV1                              |              |             |          |                                                                                             | NHL                                                                | repeat(SSF101898,5.8E-12,1015-1281)                    |
| 167 | 118,281  | 122,579 | 4299   | 1432 | hypothetical protein                             |                                   |              |             |          |                                                                                             | NHL                                                                | repeat(SSF101898,2.1E-9,1107-1423)                     |
| 168 | 122,643  | 123,041 | 399    | 132  | hypothetical protein                             |                                   |              |             |          |                                                                                             |                                                                    |                                                        |
| 169 | 122,983  | 124,761 | 1779   | 592  | hypothetical protein                             | Clostridium sp.<br>JC122          | WP_010291791 | 29.50%      | 1.83E-27 | 438(153-590)                                                                                |                                                                    |                                                        |
|     |          |         |        |      | hypothetical protein                             | Synechococcus<br>phage S-RIM8     | YP_007518185 | 25.90%      | 3.77E-04 | 172(178-349)                                                                                |                                                                    |                                                        |
| 170 | 124,856  | 125,194 | 339    | 112  | hypothetical protein                             | Methylobacterium<br>extorquens    | WP_003600553 | 26.20%      | 3.55E-02 | 101(7-107)                                                                                  |                                                                    |                                                        |
|     |          |         |        |      | SXDG_00036                                       | A.HR1                             |              |             |          |                                                                                             |                                                                    |                                                        |



| ID  | Position |         | Length |     | BlastP hit in GenBank nr and/or viruses data set |                                     |              |             |          |                                             | NCBI conserved domain (ID, E-value, alignment length in aa, alignment start - end position) | Interproscan matches (ID, E-value, alignment start - end position)    |
|-----|----------|---------|--------|-----|--------------------------------------------------|-------------------------------------|--------------|-------------|----------|---------------------------------------------|---------------------------------------------------------------------------------------------|-----------------------------------------------------------------------|
|     | start    | end     | nt     | aa  | ORF, protein encoded, or mass                    | Species                             | Accession    | Aa identity | E Value  | Alignment length in aa (Start-end position) |                                                                                             |                                                                       |
| 171 | 125,221  | 126,165 | 945    | 314 | hypothetical protein OSG_eHP7_00185, partial     | Environmental Halophage eHP-7       | AFH21718     | 33.60%      | 3.94E-03 | 104(46-149)                                 |                                                                                             | Concanavalin A-like lectins/glucanases(SSF49899, 9.7E-14,105-313)     |
| 172 | 126,162  | 128,846 | 2685   | 894 |                                                  |                                     |              |             |          |                                             |                                                                                             |                                                                       |
| 173 | 128,839  | 129,480 | 642    | 213 | hypothetical protein OIV1_072                    | Ostreococcus lucimarinus virus OIV1 | YP_004061705 | 28.70%      | 5.46E-05 | 145(15-159)                                 |                                                                                             | LPXTG_anchor: LPXTG cell wall anchor domain(TIGR01167,0.0017,183-211) |
|     |          |         |        |     |                                                  |                                     |              |             |          |                                             |                                                                                             | transmembrane_regions(tmhmm , -1.0,188-206)                           |
| 174 | 129,571  | 132,447 | 2877   | 958 | hypothetical protein SXBG_00214                  | Synechococcus phage S-CAM1          | YP_007673127 | 45.80%      | 1.88E-83 | 384(500-883)                                |                                                                                             |                                                                       |
| 175 | 132,466  | 133,209 | 744    | 247 | hypothetical protein Dred_1404                   | Desulfotomaculum reducens MI-1      | YP_001112759 | 31.60%      | 1.59E-03 | 94(584-677)                                 |                                                                                             |                                                                       |
| 176 | 133,227  | 133,562 | 336    | 111 | hypothetical protein MPVG_00058                  | Micromonas pusilla virus 12T        | YP_007676126 | 39.20%      | 1.60E-10 | 102(8-109)                                  |                                                                                             | signal-peptide(SignalP-NN(euk), -1.0,1-29)                            |
|     |          |         |        |     |                                                  |                                     |              |             |          |                                             |                                                                                             | transmembrane_regions(tmhmm , -1.0,9-27)                              |

| ID  | Position |         | Length |     | BlastP hit in GenBank nr and/or viruses data set |                                |              |             |           |                                             | NCBI conserved domain (ID, E-value, alignment length in aa, alignment start - end position) | Interproscan matches (ID, E-value, alignment start - end position) |
|-----|----------|---------|--------|-----|--------------------------------------------------|--------------------------------|--------------|-------------|-----------|---------------------------------------------|---------------------------------------------------------------------------------------------|--------------------------------------------------------------------|
|     | start    | end     | nt     | aa  | ORF, protein encoded, or mass                    | Species                        | Accession    | Aa identity | E Value   | Alignment length in aa (Start-end position) |                                                                                             |                                                                    |
| 177 | 133,527  | 134,729 | 1203   | 400 | hypothetical protein MpV1_067c                   | Micromonas sp. RCC1109 virus   | YP_004061950 | 50.00%      | 1.55E-99  | 349(36-384)                                 |                                                                                             | signal-peptide(SignalP-NN(euk),-1.0,1-27)                          |
|     |          |         |        |     | hypothetical protein                             | Verrucomicrobia bacterium SCGC | WP_020036370 | 46.00%      | 4.14E-89  | 365(36-400)                                 |                                                                                             |                                                                    |
| 178 | 134,743  | 135,045 | 303    | 100 |                                                  |                                |              |             |           |                                             |                                                                                             | signal-peptide(SignalP-NN(euk),-1.0,1-95)                          |
|     |          |         |        |     |                                                  |                                |              |             |           |                                             |                                                                                             | transmembrane_regions(tmhmm , -1.0,52-72;78-98)                    |
| 179 | 135,124  | 135,309 | 186    | 61  | hypothetical protein BpV1_053c                   | Bathycoccus sp. RCC1105 virus  | YP_004061483 | 36.10%      | 7.55E-03  | 59(2-60)                                    |                                                                                             | signal-peptide(SignalP-NN(euk),-1.0,40-60)                         |
| 180 | 135,296  | 135,721 | 426    | 141 |                                                  |                                |              |             |           |                                             |                                                                                             |                                                                    |
| 181 | 135,713  | 138,064 | 2352   | 783 | VV A18-like intein-containing helicase           | Phaeocystis globosa virus      | YP_008052508 | 40.70%      | 0         | 754(10-763)                                 | HELICc Superfamily(c117351,2.15e-05,100,626-725)                                            | DEAD-like helicases superfamily(SM00487,0.0015,402-592)            |
|     |          |         |        |     | hypothetical protein                             | Verrucomicrobia bacterium SCGC | WP_020036356 | 58.60%      | 9.33E-133 | 333(450-782)                                | Hom_end_hint(pfam05203,2.97e-65,334,116-449)                                                | Homing endonucleases(SSF55608,2.8E-16,302-415)                     |
| 182 | 138,105  | 138,380 | 276    | 91  |                                                  |                                |              |             |           |                                             |                                                                                             | transmembrane_regions(tmhmm , -1.0,68-88)                          |

| ID  | Position |         | Length |     | BlastP hit in GenBank nr and/or viruses data set |                                     |              |             |          |                                             | NCBI conserved domain (ID, E-value, alignment length in aa, alignment start - end position) | Interproscan matches (ID, E-value, alignment start - end position) |
|-----|----------|---------|--------|-----|--------------------------------------------------|-------------------------------------|--------------|-------------|----------|---------------------------------------------|---------------------------------------------------------------------------------------------|--------------------------------------------------------------------|
|     | start    | end     | nt     | aa  | ORF, protein encoded, or mass                    | Species                             | Accession    | Aa identity | E Value  | Alignment length in aa (Start-end position) |                                                                                             |                                                                    |
| 183 | 138,393  | 139,139 | 747    | 248 |                                                  |                                     |              |             |          |                                             |                                                                                             | transmembrane_regions(tmhmm , -1.0,224-244)                        |
| 184 | 139,149  | 140,597 | 1449   | 482 |                                                  |                                     |              |             |          |                                             | PAN_APPLE<br>Superfamily(cl00112,5.78e-06,46,157-202)                                       | PAN_4(PF14295,9.4E-8,158-202)                                      |
| 185 | 140,584  | 140,835 | 252    | 83  | hypothetical protein MPWG_00255                  | Micromonas pusilla virus PL1        | AET43739     | 32.70%      | 5.75E-07 | 76(4-79)                                    |                                                                                             |                                                                    |
|     |          |         |        |     | hypothetical protein                             | bacterium SCGC AAA164-N20           | WP_020036358 | 27.30%      | 5.26E-05 | 78(4-81)                                    |                                                                                             |                                                                    |
| 186 | 140,832  | 141,383 | 552    | 183 | aspartyl/asparaginyl beta-hydroxylase            | Burkholderia dolosa                 | WP_006765711 | 32.60%      | 3.99E-13 | 177(2-178)                                  | Asp_Arg_Hydrox<br>Superfamily(cl17820,2.48e-13,173,9-181)                                   | ASPARTYL/ASPARAGINYL BETA-HYDROXYLASE(PTHR12366,2.2E-15,5-179)     |
| 187 | 141,434  | 142,663 | 1230   | 409 | hypothetical protein OLOG_00074                  | Ostreococcus lucimarinus virus OIV4 | AET84537     | 30.40%      | 9.59E-13 | 177(5-181)                                  |                                                                                             |                                                                    |
|     |          |         |        |     | hypothetical protein OLOG_00133                  | Ostreococcus lucimarinus virus OIV4 | AET84594     | 24.00%      | 1.59E-03 | 190(213-402)                                |                                                                                             |                                                                    |
| 188 | 142,660  | 143,511 | 852    | 283 | hypothetical protein OIV1_059                    | Ostreococcus lucimarinus virus OIV1 | YP_004061692 | 24.30%      | 4.26E-15 | 264(1-264)                                  |                                                                                             | transmembrane_regions(tmhmm , -1.0,229-251)                        |
| 189 | 143,531  | 143,755 | 225    | 74  |                                                  |                                     |              |             |          |                                             |                                                                                             | signal-peptide(SignalP-NN(euk), -1.0,1-29)                         |

| ID  | Position |         | Length |     | BlastP hit in GenBank nr and/or viruses data set |                                           |              |             |          |                                             | NCBI conserved domain (ID, E-value, alignment length in aa, alignment start - end position) | Interproscan matches (ID, E-value, alignment start - end position) |                                          |
|-----|----------|---------|--------|-----|--------------------------------------------------|-------------------------------------------|--------------|-------------|----------|---------------------------------------------|---------------------------------------------------------------------------------------------|--------------------------------------------------------------------|------------------------------------------|
|     | start    | end     | nt     | aa  | ORF, protein encoded, or mass                    | Species                                   | Accession    | Aa identity | E Value  | Alignment length in aa (Start-end position) |                                                                                             |                                                                    |                                          |
|     |          |         |        |     |                                                  |                                           |              |             |          |                                             |                                                                                             |                                                                    | transmembrane_regions(tmhmm , -1.0,9-27) |
| 190 | 143,812  | 144,459 | 648    | 215 | hypothetical protein MpV1_028                    | Micromonas sp. RCC1109 virus              | YP_004061911 | 46.60%      | 1.46E-68 | 214(2-215)                                  |                                                                                             |                                                                    |                                          |
|     |          |         |        |     | hypothetical protein                             | Acinetobacter sp. P8-3-8                  | WP_010113641 | 25.40%      | 4.21E-07 | 172(39-210)                                 |                                                                                             |                                                                    |                                          |
| 191 | 144,483  | 145,526 | 1044   | 347 | glycylpeptide N-tetradecanoyltransferase 2       | Phytophthora infestans T30-4              | XP_002904064 | 44.20%      | 1.46E-99 | 343(4-346)                                  | NMT(pfam01233,5.32e-59,143,4-146)                                                           | N-MYRISTOYL TRANSFERASE(PTHR11377,5.6E-135,4-347)                  |                                          |
|     |          |         |        |     |                                                  |                                           |              |             |          |                                             | NMT_C(pfam02799,3.83e-56,181,166-346)                                                       |                                                                    |                                          |
| 192 | 145,515  | 146,210 | 696    | 231 | hypothetical protein BpV1_043                    | Bathycoccus sp. RCC1105 virus             | YP_004061473 | 56.80%      | 6.30E-82 | 227(1-227)                                  |                                                                                             |                                                                    |                                          |
|     |          |         |        |     | hypothetical protein                             | Verrucomicrobia bacterium SCGC AAA164-N20 | WP_020036365 | 55.10%      | 9.38E-81 | 229(1-229)                                  | Pox_A22(pfam04848,2.92e-06,160,2-161)                                                       | Pox_A22(PF04848,3.6E-12,2-158)                                     |                                          |
| 193 | 146,246  | 146,806 | 561    | 186 | hypothetical protein BpV2_040c                   | Bathycoccus sp. RCC1105 virus             | ADQ91207     | 40.90%      | 2.30E-32 | 180(7-186)                                  |                                                                                             | signal-peptide(SignalP-NN(euk),-1.0,1-16)                          |                                          |
| 194 | 146,809  | 147,570 | 762    | 253 |                                                  |                                           |              |             |          |                                             |                                                                                             |                                                                    |                                          |
| 195 | 147,509  | 147,985 | 477    | 158 |                                                  |                                           |              |             |          |                                             |                                                                                             | signal-peptide(SignalP-NN(euk),-1.0,1-27)                          |                                          |

| ID  | Position |         | Length |     | BlastP hit in GenBank nr and/or viruses data set |                                          |                 |              |          |                                             | NCBI conserved domain (ID, E-value, alignment length in aa, alignment start - end position) | Interproscan matches (ID, E-value, alignment start - end position)    |
|-----|----------|---------|--------|-----|--------------------------------------------------|------------------------------------------|-----------------|--------------|----------|---------------------------------------------|---------------------------------------------------------------------------------------------|-----------------------------------------------------------------------|
|     | start    | end     | nt     | aa  | ORF, protein encoded, or mass                    | Species                                  | Accession       | Aa identity  | E Value  | Alignment length in aa (Start-end position) |                                                                                             |                                                                       |
| 196 | 147,986  | 148,303 | 318    | 105 | hypothetical protein H665_p049                   | Ostreococcus tauri virus 1               | YP_003212873    | 44.20%       | 3.10E-20 | 103(3-105)                                  |                                                                                             | transmembrane_regions(tmhmm , -1.0,5-23)                              |
|     |          |         |        |     | hypothetical protein                             | actinobacterium                          | SCGC AAA015-M09 | WP_020020241 | 40.80%   | 2.83E-17                                    | 102(3-104)                                                                                  |                                                                       |
| 197 | 148,302  | 149,237 | 936    | 311 | hypothetical protein AURANDRAFT_60621            | Aureococcus anophagefferens              | EGB13093        | 31.80%       | 1.85E-18 | 216(49-264)                                 |                                                                                             | signal-peptide(SignalP-NN(euk), -1.0,1-41)                            |
| 198 | 149,249  | 149,929 | 681    | 226 | transcription elongation factor SII              | Micromonas pusilla virus 12T             | YP_007676093    | 35.80%       | 2.70E-27 | 186(41-226)                                 | TFIIS_C(c102609,2.58e-14,60,166-225)                                                        | TRANSCRIPTION ELONGATION FACTOR S-II(PTHR11477,9.0E-14,146-225)       |
|     |          |         |        |     | hypothetical protein                             | Verrucomicrobia bacterium                | SCGC AAA164-N20 | WP_020036216 | 32.60%   | 2.41E-20                                    | 185(41-225)                                                                                 |                                                                       |
| 199 | 149,876  | 150,421 | 546    | 181 | GIY-YIG catalytic domain-containing endonuclease | Paramecium bursaria Chlorella virus CZ-2 | AGE52752        | 43.70%       | 6.35E-16 | 141(13-153)                                 | GIY-YIG_SF(c115257,7.70e-24,91,4-94)                                                        | grpIintron_endo: group I intron endonuclease(TIGR01453,1.2E-20,3-122) |

| ID  | Position |         | Length |     | BlastP hit in GenBank nr and/or viruses data set |                                |              |             |          |                                             | NCBI conserved domain (ID, E-value, alignment length in aa, alignment start - end position) | Interproscan matches (ID, E-value, alignment start - end position) |
|-----|----------|---------|--------|-----|--------------------------------------------------|--------------------------------|--------------|-------------|----------|---------------------------------------------|---------------------------------------------------------------------------------------------|--------------------------------------------------------------------|
|     | start    | end     | nt     | aa  | ORF, protein encoded, or mass                    | Species                        | Accession    | Aa identity | E Value  | Alignment length in aa (Start-end position) |                                                                                             |                                                                    |
| 200 | 150,479  | 151,054 | 576    | 191 |                                                  |                                |              |             |          |                                             |                                                                                             |                                                                    |
| 201 | 151,098  | 151,487 | 390    | 129 |                                                  |                                |              |             |          |                                             |                                                                                             |                                                                    |
|     | 151,609  | 151,881 | 273    | 90  | hypothetical protein OLOG_00017                  | Ostreococcus lucimarinus virus | AET84483     | 40.00%      | 1.57E-10 | 84(5-88)                                    |                                                                                             |                                                                    |
| 202 |          |         |        |     |                                                  | OIV4<br>Verrucomicrobia        |              |             |          |                                             |                                                                                             |                                                                    |
|     |          |         |        |     | hypothetical protein                             | bacterium SCGC                 | WP_020036217 | 31.00%      | 7.73E-06 | 82(7-88)                                    |                                                                                             |                                                                    |
|     |          |         |        |     |                                                  | AAA164-N20                     |              |             |          |                                             |                                                                                             |                                                                    |
| 203 | 151,856  | 152,326 | 471    | 156 |                                                  |                                |              |             |          |                                             |                                                                                             |                                                                    |
|     | 152,283  | 152,996 | 714    | 237 | hypothetical protein MPXG_00183                  | Micromonas pusilla virus SP1   | AET84981     | 41.00%      | 1.27E-12 | 78(48-125)                                  | RING(c117238,9.61e-08,47,52-98)                                                             | zf-RING_2(PF13639,3.2E-7,52-95)                                    |
| 204 |          |         |        |     |                                                  | Kluyveromyces                  |              |             |          |                                             |                                                                                             |                                                                    |
|     |          |         |        |     | hypothetical protein                             | lactis NRRL Y-1140             | XP_455630    | 42.90%      | 8.02E-06 | 56(40-95)                                   | zf-C3HC4_2(pfam13923,3.15e-04,48,49-96)                                                     |                                                                    |
|     | 152,980  | 153,240 | 261    | 86  |                                                  |                                |              |             |          |                                             |                                                                                             | signal-peptide(SignalP-NN(euk),-1.0,1-33)                          |
| 205 |          |         |        |     |                                                  |                                |              |             |          |                                             |                                                                                             | transmembrane_regions(tmhmm , -1.0,19-39;54-74)                    |
|     | 153,247  | 153,687 | 441    | 146 |                                                  |                                |              |             |          |                                             |                                                                                             | signal-peptide(SignalP-NN(euk),-1.0,1-18)                          |
| 206 |          |         |        |     |                                                  |                                |              |             |          |                                             |                                                                                             | transmembrane_regions(tmhmm , -1.0,29-49;64-82;112-132)            |

| ID  | Position |         | Length |     | BlastP hit in GenBank nr and/or viruses data set |                                                    |              |             |          |                                             | NCBI conserved domain (ID, E-value, alignment length in aa, alignment start - end position) | Interproscan matches (ID, E-value, alignment start - end position)          |
|-----|----------|---------|--------|-----|--------------------------------------------------|----------------------------------------------------|--------------|-------------|----------|---------------------------------------------|---------------------------------------------------------------------------------------------|-----------------------------------------------------------------------------|
|     | start    | end     | nt     | aa  | ORF, protein encoded, or mass                    | Species                                            | Accession    | Aa identity | E Value  | Alignment length in aa (Start-end position) |                                                                                             |                                                                             |
| 207 | 153,740  | 155,320 | 1581   | 526 | hypothetical protein OtV6_055                    | Ostreococcus tauri virus RT-2011                   | AFC34963     | 38.50%      | 1.63E-92 | 469(56-524)                                 | Cupin_8(pfam13621,1.15e-05,42,78-119;1.21e-04,50,216-265)                                   | HYPOXIA-INDUCIBLE FACTOR 1 ALPHA INHIBITOR-RELATED(PTHR12461,3.2E-4,84-119) |
| 208 | 155,353  | 155,628 | 276    | 91  | hypothetical protein Dole_0615                   | Desulfococcus oleovorans Hxd3                      | YP_001528502 | 35.40%      | 7.10E-05 | 79(446-524)                                 |                                                                                             | Cupin_8(PF13621,1.1E-6,200-275)                                             |
| 209 | 155,649  | 155,819 | 171    | 56  |                                                  |                                                    |              |             |          |                                             |                                                                                             |                                                                             |
| 210 | 155,799  | 156,551 | 753    | 250 | hypothetical protein BpV2_005c                   | Bathycoccus sp. RCC1105 virus BpV2 Verrucomicrobia | ADQ91172     | 40.80%      | 5.38E-52 | 238(2-239)                                  | YqaJ(cl09232,2.09e-04,88,109-196)                                                           | YqaJ(PF09588,5.5E-8,7-200)                                                  |
|     |          |         |        |     | hypothetical protein                             | bacterium SCGC AAA164-N20                          | WP_020036581 | 40.30%      | 6.57E-50 | 238(2-239)                                  |                                                                                             |                                                                             |
| 211 | 156,588  | 156,875 | 288    | 95  | unknown                                          | Picea sitchensis                                   | ABK26381     | 41.00%      | 1.00E-05 | 59(36-94)                                   | CP12 Superfamily(cl14670,2.29e-08,61,35-95)                                                 | CP12(PF02672,1.9E-10,31-94)                                                 |
|     | 156,872  | 157,249 | 378    | 125 |                                                  |                                                    |              |             |          |                                             |                                                                                             | signal-peptide(SignalP-NN(euk),-1.0,1-20)                                   |
| 212 |          |         |        |     |                                                  |                                                    |              |             |          |                                             |                                                                                             | transmembrane_regions(tmhmm ,,-1.0,4-22;43-57;67-87;102-120)                |
| 213 | 157,268  | 157,558 | 291    | 96  | hypothetical protein                             | Paramecium bursaria Chlorella virus 1              | NP_048837    | 41.50%      | 9.17E-04 | 43(1-43)                                    | COG5540(COG5540,4.01e-03,40,5-44)                                                           | RING/U-box(SSF57850,6.5E-6,1-61)                                            |

| ID  | Position |         | Length |     | BlastP hit in GenBank nr and/or viruses data set |                                  |              |             |          | NCBI conserved domain (ID, E-value, alignment length in aa, alignment start - end position) | Interproscan matches (ID, E-value, alignment start - end position)                         |                                                       |
|-----|----------|---------|--------|-----|--------------------------------------------------|----------------------------------|--------------|-------------|----------|---------------------------------------------------------------------------------------------|--------------------------------------------------------------------------------------------|-------------------------------------------------------|
|     | start    | end     | nt     | aa  | ORF, protein encoded, or mass                    | Species                          | Accession    | Aa identity | E Value  |                                                                                             |                                                                                            | Alignment length in aa (Start-end position)           |
| 214 | 157,765  | 158,181 | 417    | 138 |                                                  |                                  |              |             |          |                                                                                             |                                                                                            |                                                       |
| 215 | 158,201  | 158,440 | 240    | 79  |                                                  |                                  |              |             |          |                                                                                             |                                                                                            |                                                       |
| 216 | 158,442  | 158,711 | 270    | 89  |                                                  |                                  |              |             |          |                                                                                             |                                                                                            |                                                       |
|     | 158,683  | 159,639 | 957    | 318 | Heat shock protein 40                            | Ectocarpus siliculosus           | CBJ30599     | 37.20%      | 8.35E-49 | 304(1-304)                                                                                  | DnaJ(cl02542,2.15e-21,49,2-50)                                                             | Chaperone J-domain(SSF46565,4.7E-29,1-103)            |
| 217 |          |         |        |     |                                                  |                                  |              |             |          |                                                                                             | DnaJ_C Superfamily(cl03262,6.20e-22,206,99-304)<br>DnaJ_bact(TIGR02349,5.86e-79,315,2-316) |                                                       |
| 218 | 159,667  | 160,065 | 399    | 132 |                                                  |                                  |              |             |          |                                                                                             |                                                                                            |                                                       |
| 219 | 160,087  | 161,685 | 1599   | 532 | sensor histidine kinase                          | Parabacteroides johnsonii        | WP_008147758 | 25.40%      | 3.35E-03 | 207(307-513)                                                                                |                                                                                            |                                                       |
| 220 | 161,722  | 161,976 | 255    | 84  |                                                  |                                  |              |             |          |                                                                                             |                                                                                            |                                                       |
| 221 | 162,033  | 162,608 | 576    | 191 |                                                  |                                  |              |             |          |                                                                                             |                                                                                            |                                                       |
| 222 | 162,627  | 163,451 | 825    | 274 | DNA ligase III                                   | Comamonas testosteroni           | WP_003062464 | 33.30%      | 9.73E-03 | 109(9-117)                                                                                  |                                                                                            |                                                       |
| 223 | 164,062  | 164,256 | 195    | 64  |                                                  |                                  |              |             |          |                                                                                             |                                                                                            |                                                       |
|     | 164,307  | 164,858 | 552    | 183 | predicted protein                                | Populus trichocarpa              | XP_002305796 | 36.10%      | 6.08E-19 | 145(19-163)                                                                                 | CDC48_N(pfam02359,5.13e-03,75,20-94)                                                       | VESICULAR-FUSION PROTEIN NSF(PTHR23078,2.6E-14,9-159) |
| 224 |          |         |        |     |                                                  |                                  |              |             |          |                                                                                             | CDC48_2 Superfamily(cl08380,6.85e-03,56,119-174)                                           |                                                       |
| 225 | 164,882  | 165,097 | 216    | 71  | hypothetical protein PBCVKS1B_593L               | Paramecium bursaria<br>Chlorella | AGE54713     | 52.00%      | 3.84E-05 | 48(8-55)                                                                                    |                                                                                            |                                                       |



| ID  | Position |         | Length |     | BlastP hit in GenBank nr and/or viruses data set |                                           |              |             |          | NCBI conserved domain (ID, E-value, alignment length in aa, alignment start - end position) | Interproscan matches (ID, E-value, alignment start - end position) |                                             |
|-----|----------|---------|--------|-----|--------------------------------------------------|-------------------------------------------|--------------|-------------|----------|---------------------------------------------------------------------------------------------|--------------------------------------------------------------------|---------------------------------------------|
|     | start    | end     | nt     | aa  | ORF, protein encoded, or mass                    | Species                                   | Accession    | Aa identity | E Value  |                                                                                             |                                                                    | Alignment length in aa (Start-end position) |
|     |          |         |        |     |                                                  | virus KS1B                                |              |             |          |                                                                                             |                                                                    |                                             |
|     |          |         |        |     | hypothetical protein Dalk_3573                   | Desulfatibacillum alkenivorans AK-01      | YP_002432729 | 38.90%      | 3.31E-03 | 54(3-56)                                                                                    |                                                                    |                                             |
| 226 | 165,204  | 165,509 | 306    | 101 |                                                  |                                           |              |             |          |                                                                                             |                                                                    |                                             |
| 227 | 165,531  | 166,034 | 504    | 167 | hypothetical protein                             | Arthrobacter sp. M2012083                 | WP_017197732 | 37.20%      | 5.04E-21 | 159(2-160)                                                                                  |                                                                    |                                             |
|     |          |         |        |     | phosphate starvation protein PhoH                | Verrucomicrobia bacterium SCGC AAA164-N20 | WP_020036220 | 51.30%      | 8.71E-63 | 198(8-205)                                                                                  | PhoH(c117668,2.51e-88,206,1-206)                                   | PhoH(PF02562,5.9E-71,2-206)                 |
| 228 | 166,031  | 166,651 | 621    | 206 | hypothetical protein MpV1_231c                   | Micromonas sp. RCC1109 virus MpV1         | YP_004062114 | 52.80%      | 2.72E-69 | 197(9-205)                                                                                  |                                                                    |                                             |
| 229 | 166,634  | 167,470 | 837    | 278 |                                                  |                                           |              |             |          |                                                                                             |                                                                    |                                             |
| 230 | 167,469  | 167,630 | 162    | 53  |                                                  |                                           |              |             |          |                                                                                             |                                                                    |                                             |
| 231 | 167,696  | 168,028 | 333    | 110 |                                                  |                                           |              |             |          |                                                                                             |                                                                    |                                             |
| 232 | 168,031  | 168,258 | 228    | 75  |                                                  |                                           |              |             |          |                                                                                             |                                                                    |                                             |
| 233 | 168,277  | 169,191 | 915    | 304 |                                                  |                                           |              |             |          |                                                                                             | PLN03223(PLN03223,3.22e-03,102,108-209)                            |                                             |
| 234 | 169,212  | 169,895 | 684    | 227 |                                                  |                                           |              |             |          |                                                                                             |                                                                    |                                             |
| 235 | 169,916  | 170,608 | 693    | 230 | hypothetical protein                             | Arthrobacter sp. 131MFC06.1               | WP_018775835 | 40.60%      | 4.96E-48 | 227(4-230)                                                                                  | Glyco_hydro_cc Superfamily(c113267,3.17e-51,165,63-227)            | Glyco_hydro_cc(PF11790,1.0E-53,10-227)      |
| 236 | 170,654  | 171,067 | 414    | 137 | PREDICTED: RING finger protein 145-like          | Metaseiulus occidentalis                  | XP_003744587 | 43.20%      | 2.40E-09 | 73(3-75)                                                                                    | RING(cd00162,8.13e-06,44,2-45)                                     | RING/U-box(SSF57850,5.3E-14,2-49)           |
|     |          |         |        |     |                                                  |                                           |              |             |          |                                                                                             | zf-C3HC4_2(pfam13923,7.12e-05,43,2-44)                             |                                             |

| ID    | Position |       | Length |     | BlastP hit in GenBank nr and/or viruses data set |                           |              |             |          |                                             | NCBI conserved domain (ID, E-value, alignment length in aa, alignment start - end position) | Interproscan matches (ID, E-value, alignment start - end position) |
|-------|----------|-------|--------|-----|--------------------------------------------------|---------------------------|--------------|-------------|----------|---------------------------------------------|---------------------------------------------------------------------------------------------|--------------------------------------------------------------------|
|       | start    | end   | nt     | aa  | ORF, protein encoded, or mass                    | Species                   | Accession    | Aa identity | E Value  | Alignment length in aa (Start-end position) |                                                                                             |                                                                    |
| YSLGV |          |       |        |     |                                                  |                           |              |             |          |                                             |                                                                                             |                                                                    |
|       |          |       |        |     |                                                  |                           |              |             |          |                                             |                                                                                             | signal-peptide(SignalP-NN(euk),-1.0,1-44)                          |
| 1     | 47       | 226   | 180    | 59  |                                                  |                           |              |             |          |                                             |                                                                                             | transmembrane_regions(tmhmm,-1.0,29-49)                            |
| 2     | 341      | 667   | 327    | 108 |                                                  |                           |              |             |          |                                             |                                                                                             |                                                                    |
| 3     | 679      | 831   | 153    | 50  |                                                  |                           |              |             |          |                                             |                                                                                             |                                                                    |
| 4     | 1,100    | 1,336 | 237    | 78  | hypothetical protein                             | Acanthamoeba polyphaga    | YP_003986937 | 46.50%      | 4.43E-03 | 43(15-57)                                   |                                                                                             |                                                                    |
|       |          |       |        |     |                                                  | mimivirus                 |              |             |          |                                             |                                                                                             |                                                                    |
| 5     | 1,769    | 2,698 | 930    | 309 | hypothetical protein                             | Ruminococcus sp. JC304    | WP_019163853 | 35.60%      | 7.59E-38 | 247(34-280)                                 |                                                                                             |                                                                    |
|       |          |       |        |     | hypothetical protein                             | Megavirus lba             | YP_007418839 | 33.20%      | 5.31E-36 | 301(2-302)                                  |                                                                                             |                                                                    |
|       |          |       |        |     | LBA_00945                                        |                           |              |             |          |                                             |                                                                                             |                                                                    |
| 6     | 2,816    | 2,968 | 153    | 50  | hypothetical protein                             | Synechococcus phage S-SM2 | YP_004322264 | 75.90%      | 1.86E-03 | 29(13-41)                                   |                                                                                             |                                                                    |
|       |          |       |        |     | SSM2_108                                         |                           |              |             |          |                                             |                                                                                             |                                                                    |
| 7     | 2,989    | 3,738 | 750    | 249 |                                                  |                           |              |             |          |                                             | zf-C3HC4_2(pfam13923,6.65e-03,44,162-205)                                                   |                                                                    |
| 8     | 3,761    | 3,982 | 222    | 73  |                                                  |                           |              |             |          |                                             |                                                                                             |                                                                    |
| 9     | 4,041    | 4,730 | 690    | 229 |                                                  |                           |              |             |          |                                             |                                                                                             |                                                                    |
|       |          |       |        |     | hypothetical protein                             | Emiliana huxleyi          | EOD13544     | 39.10%      | 1.40E-06 | 66(141-206)                                 |                                                                                             | ZF_RING_2(PS50089,10.97,165-204)                                   |
|       | 4,800    | 5,444 | 645    | 214 | EMIHUDRAFT_451                                   | CCMP1516                  |              |             |          |                                             |                                                                                             |                                                                    |
| 10    |          |       |        |     | 978                                              |                           |              |             |          |                                             |                                                                                             | RING/U-box(SSF57850,9.4E-11,160-214)                               |

| ID | Position |        | Length |     | BlastP hit in GenBank nr and/or viruses data set |                                                |              |             |           |                                             | NCBI conserved domain (ID, E-value, alignment length in aa, alignment start - end position) | Interproscan matches (ID, E-value, alignment start - end position)                          |
|----|----------|--------|--------|-----|--------------------------------------------------|------------------------------------------------|--------------|-------------|-----------|---------------------------------------------|---------------------------------------------------------------------------------------------|---------------------------------------------------------------------------------------------|
|    | start    | end    | nt     | aa  | ORF, protein encoded, or mass                    | Species                                        | Accession    | Aa identity | E Value   | Alignment length in aa (Start-end position) |                                                                                             |                                                                                             |
| 11 | 5,502    | 5,870  | 369    | 122 | hypothetical protein OLV2                        | Organic Lake virophage                         | ADX05763     | 38.50%      | 1.44E-07  | 90(33-122)                                  |                                                                                             |                                                                                             |
|    |          |        |        |     | hypothetical protein GUITHDRAFT_82952            | Guillardia theta CCMP2712                      | EKX31624     | 34.10%      | 1.72E-02  | 82(41-122)                                  |                                                                                             |                                                                                             |
| 12 | 5,824    | 6,198  | 375    | 124 | hypothetical protein ATCVBr0604L_859R            | Acanthocystis turfacea Chlorella virus Br0604L | AGE49303     | 49.40%      | 3.15E-14  | 80(43-122)                                  |                                                                                             |                                                                                             |
| 13 | 6,304    | 6,813  | 510    | 169 | hypothetical protein 162319347                   | Organic Lake phycodnavirus 2                   | ADX06339     | 43.80%      | 7.04E-18  | 126(3-128)                                  |                                                                                             |                                                                                             |
|    |          |        |        |     | hypothetical protein EMIHUDDRAFT_463777          | Emiliana huxleyi CCMP1516                      | EOD21788     | 24.50%      | 2.06E-02  | 140(9-148)                                  |                                                                                             |                                                                                             |
| 14 | 6,810    | 6,983  | 174    | 57  |                                                  |                                                |              |             |           |                                             |                                                                                             |                                                                                             |
| 15 | 7,002    | 8,900  | 1,899  | 632 | hypothetical protein 162319347                   | Organic Lake phycodnavirus 2                   | ADX06339     | 35.20%      | 2.07E-69  | 500(5-504)                                  | Cas3_I-D(cd09710,8.16e-03,43,208-250)                                                       | P-loop containing nucleoside triphosphate hydrolases(SSF52540,2.5E-6,157-251;4.6E-6,24-237) |
| 16 | 9,117    | 9,347  | 231    | 76  |                                                  |                                                |              |             |           |                                             |                                                                                             |                                                                                             |
| 17 | 9,425    | 10,543 | 1,119  | 372 | late transcription factor VLTF3                  | Phaeocystis globosa virus                      | YP_008052476 | 57.10%      | 7.81E-122 | 368(5-372)                                  | Pox_VLTF3(pfam04947,7.26e-38,164,206-369)                                                   | Pox_VLTF3(PF04947,3.0E-46,206-370)                                                          |
| 18 | 10,561   | 10,848 | 288    | 95  | hypothetical protein 162319399                   | Organic Lake phycodnavirus 2                   | ADX06361     | 68.80%      | 2.20E-23  | 77(17-93)                                   |                                                                                             | signal-peptide(SignalP-NN(euk),-1.0,1-16)                                                   |

| ID | Position |        | Length |     | BlastP hit in GenBank nr and/or viruses data set                        |                                           |              |             |           | NCBI conserved domain (ID, E-value, alignment length in aa, alignment start - end position) | Interproscan matches (ID, E-value, alignment start - end position) |                                               |
|----|----------|--------|--------|-----|-------------------------------------------------------------------------|-------------------------------------------|--------------|-------------|-----------|---------------------------------------------------------------------------------------------|--------------------------------------------------------------------|-----------------------------------------------|
|    | start    | end    | nt     | aa  | ORF, protein encoded, or mass                                           | Species                                   | Accession    | Aa identity | E Value   |                                                                                             |                                                                    | Alignment length in aa (Start-end position)   |
|    |          |        |        |     | hypothetical protein                                                    | Ruminococcus sp.<br>JC304                 | WP_019163465 | 49.30%      | 4.01E-09  | 72(22-93)                                                                                   |                                                                    | transmembrane_regions(tmhmm,-1.0,27-45;51-71) |
| 19 | 10,910   | 11,227 | 318    | 105 | hypothetical protein<br>PGCG_00067                                      | Phaeocystis globosa virus                 | YP_008052386 | 58.40%      | 1.25E-22  | 77(29-105)                                                                                  |                                                                    |                                               |
| 20 | 11,421   | 11,846 | 426    | 141 | hypothetical protein<br>PGCG_00067                                      | Phaeocystis globosa virus                 | YP_008052386 | 51.10%      | 1.91E-33  | 131(1-131)                                                                                  |                                                                    |                                               |
| 21 | 12,044   | 12,499 | 456    | 151 |                                                                         |                                           |              |             |           |                                                                                             | Peptidase_M13_N(pfam05649,8.60e-06,123,12-134)                     |                                               |
| 22 | 12,683   | 13,177 | 495    | 164 | PREDICTED:<br>putative zinc metalloproteinase<br>T16A9.4-like isoform 1 | Nasonia vitripennis                       | XP_001599960 | 27.00%      | 2.77E-03  | 125(39-163)                                                                                 | Peptidase_M13_N super family(c114911,2.91e-14,161,3-163)           | Peptidase_M13_N(PF05649,9.9E-13,11-163)       |
| 23 | 13,281   | 13,628 | 348    | 115 | endopeptidase                                                           | Lactobacillus casei subsp. casei ATCC 393 | BAN74100     | 48.00%      | 2.59E-14  | 75(35-109)                                                                                  | M13(cd08662,4.27e-21,75,36-110)                                    | Peptidase_M13(PF01431,1.0E-16,38-113)         |
| 24 | 13,683   | 14,000 | 318    | 105 | putative metalloendopeptidase                                           | Prevotella sp.<br>CAG:485                 | WP_022405175 | 35.20%      | 1.07E-05  | 100(5-104)                                                                                  | Peptidase_M13 super family(c117766,8.20e-10,93,5-97)               | Peptidase_M13(PF01431,2.0E-13,4-101)          |
| 25 | 14,400   | 15,239 | 840    | 279 | VV A32-like packaging ATPase                                            | Phaeocystis globosa virus                 | YP_008052384 | 78.10%      | 3.20E-161 | 279(1-279)                                                                                  |                                                                    | Pox_A32(PF04665,9.2E-7,94-225)                |
|    |          |        |        |     | hypothetical protein                                                    | Verrucomicrobia bacterium SCGC AAA164-N20 | WP_020036342 | 46.40%      | 3.14E-75  | 247(1-247)                                                                                  |                                                                    |                                               |

| ID | Position |        | Length |     | BlastP hit in GenBank nr and/or viruses data set |                           |                   |             |           |                                             | NCBI conserved domain (ID, E-value, alignment length in aa, alignment start - end position) | Interproscan matches (ID, E-value, alignment start - end position) |
|----|----------|--------|--------|-----|--------------------------------------------------|---------------------------|-------------------|-------------|-----------|---------------------------------------------|---------------------------------------------------------------------------------------------|--------------------------------------------------------------------|
|    | start    | end    | nt     | aa  | ORF, protein encoded, or mass                    | Species                   | Accession         | Aa identity | E Value   | Alignment length in aa (Start-end position) |                                                                                             |                                                                    |
| 26 | 15,682   | 16,863 | 1,182  | 393 | phosphotransferase                               | Phaeocystis               | YP_008052382      | 35.10%      | 2.85E-42  | 384(1-384)                                  |                                                                                             |                                                                    |
|    |          |        |        |     | GIV83-like protein                               | globosa virus             |                   |             |           |                                             |                                                                                             |                                                                    |
| 27 | 16,772   | 17,071 | 300    | 99  | hypothetical protein                             | Bacillus subtilis         | WP_003239010      | 26.80%      | 5.68E-02  | 184(81-264)                                 |                                                                                             |                                                                    |
|    |          |        |        |     | phosphotransferase                               | Organic Lake              | ADX06274          | 54.40%      | 3.36E-23  | 90(6-95)                                    |                                                                                             |                                                                    |
| 28 | 17,043   | 17,195 | 153    | 50  | phosphotransferase                               | Organic Lake              | ADX06204          | 75.00%      | 1.25E-67  | 160(8-167)                                  |                                                                                             |                                                                    |
|    |          |        |        |     | GIV83-like protein                               | phycodnavirus 2           |                   |             |           |                                             |                                                                                             |                                                                    |
| 29 | 17,423   | 17,926 | 504    | 167 | hypothetical protein                             | Organic Lake              | ADX06204          | 75.00%      | 1.25E-67  | 160(8-167)                                  |                                                                                             |                                                                    |
|    |          |        |        |     | 162300046                                        | phycodnavirus 2           |                   |             |           |                                             |                                                                                             |                                                                    |
| 30 | 18,035   | 19,054 | 1,020  | 339 | putative site-specific DNA methyltransferase     | Bacteroides pectinophilus | WP_022361645      | 34.40%      | 8.25E-07  | 128(21-148)                                 |                                                                                             |                                                                    |
|    |          |        |        |     | putative site-specific DNA methyltransferase     | Organic Lake              | ADX06203          | 64.00%      | 2.83E-159 | 339(1-339)                                  | MethyltransfD12(c117344,1.05e-51,296,43-338)                                                | dam: DNA adenine methylase(TIGR00571,2.0E-63,43-338)               |
| 31 | 19,180   | 19,401 | 222    | 73  | hypothetical protein                             | Verrucomicrobia bacterium | SCGC WP_020036269 | 45.50%      | 3.08E-82  | 297(43-339)                                 |                                                                                             |                                                                    |
|    |          |        |        |     | PGCG_00059                                       | Phaeocystis globosa virus | YP_008052378      | 45.80%      | 1.23E-06  | 69(5-73)                                    | signal-peptide(SignalP-NN(euk),-1.0,1-20)                                                   |                                                                    |
| 32 | 19,440   | 20,198 | 759    | 252 | hypothetical protein                             | Phaeocystis globosa virus | YP_008052377      | 62.00%      | 9.24E-67  | 199(1-199)                                  |                                                                                             |                                                                    |
|    |          |        |        |     | PGCG_00058                                       | Phaeocystis globosa virus | YP_008052377      | 62.00%      | 9.24E-67  | 199(1-199)                                  |                                                                                             |                                                                    |
| 33 | 20,174   | 20,575 | 402    | 133 | hypothetical protein                             | Dactylellina haptotyla    | CBS EPS38540      | 50.00%      | 8.37E-03  | 32(99-130)                                  |                                                                                             |                                                                    |
|    |          |        |        |     | H072_7704                                        | 200.50                    |                   |             |           | PRK12686(PRK12686,8.78e-03,54,43-96)        |                                                                                             |                                                                    |
| 34 | 20,572   | 21,567 | 996    | 331 | hypothetical protein                             | Phaeocystis globosa virus | YP_008052377      | 62.00%      | 9.24E-67  | 199(1-199)                                  |                                                                                             |                                                                    |
|    |          |        |        |     | PGCG_00058                                       | Phaeocystis globosa virus | YP_008052377      | 62.00%      | 9.24E-67  | 199(1-199)                                  |                                                                                             |                                                                    |

| ID | Position |        | Length |     | BlastP hit in GenBank nr and/or viruses data set |                              |              |             |          |                                             | NCBI conserved domain (ID, E-value, alignment length in aa, alignment start - end position) | Interproscan matches (ID, E-value, alignment start - end position)                   |
|----|----------|--------|--------|-----|--------------------------------------------------|------------------------------|--------------|-------------|----------|---------------------------------------------|---------------------------------------------------------------------------------------------|--------------------------------------------------------------------------------------|
|    | start    | end    | nt     | aa  | ORF, protein encoded, or mass                    | Species                      | Accession    | Aa identity | E Value  | Alignment length in aa (Start-end position) |                                                                                             |                                                                                      |
| 35 | 21,642   | 22,289 | 648    | 215 | replication factor C small subunit               | Phaeocystis globosa virus    | YP_008052376 | 41.20%      | 1.00E-37 | 215(1-215)                                  | rfc(PRK00440,1.61e-16,80,9-88)                                                              | P-loop containing nucleoside triphosphate hydrolases(SSF52540,1.8E-12,4-107)         |
|    |          |        |        |     | DNA replication ATPase                           | Thermococcus onnurineus NA1  | YP_002307801 | 41.10%      | 5.08E-13 | 107(3-109)                                  |                                                                                             | REPLICATION FACTOR C / DNA POLYMERASE III GAMMA-TAU SUBUNIT(PTHR11669,5.1E-14,10-83) |
| 36 | 22,289   | 22,531 | 243    | 80  | unknown                                          | Picea sitchensis             | ADE77654     | 37.70%      | 5.54E-05 | 53(26-78)                                   | AAA(c117189,1.13e-03,25,46-70)                                                              | no description(3.40.50.300,2.6E-6,29-77)                                             |
| 37 | 22,622   | 22,813 | 192    | 63  |                                                  |                              |              |             |          |                                             |                                                                                             |                                                                                      |
| 38 | 22,830   | 24,602 | 1,773  | 590 | hypothetical protein PGCG_00100                  | Phaeocystis globosa virus    | YP_008052419 | 35.40%      | 7.31E-87 | 588(3-590)                                  |                                                                                             | signal-peptide(SignalP-NN(euk),-1.0,1-17)                                            |
| 39 | 24,617   | 25,093 | 477    | 158 | hypothetical protein 162300206                   | Organic Lake phycodnavirus 2 | ADX06279     | 43.80%      | 3.09E-30 | 153(1-153)                                  |                                                                                             |                                                                                      |
| 40 | 25,143   | 27,155 | 2,013  | 670 | glycosyl transferase                             | Actinobacillus minor         | WP_005824596 | 40.60%      | 6.60E-63 | 359(3-361)                                  | WcaA(COG0463,1.45e-06,298,3-300)                                                            | Glycos_transf_2(PF00535,1.7E-9,10-111)                                               |

| ID | Position |        | Length |     | BlastP hit in GenBank nr and/or viruses data set |                                      |              |             |          |                                             | NCBI conserved domain (ID, E-value, alignment length in aa, alignment start - end position) | Interproscan matches (ID, E-value, alignment start - end position)          |                                                                 |
|----|----------|--------|--------|-----|--------------------------------------------------|--------------------------------------|--------------|-------------|----------|---------------------------------------------|---------------------------------------------------------------------------------------------|-----------------------------------------------------------------------------|-----------------------------------------------------------------|
|    | start    | end    | nt     | aa  | ORF, protein encoded, or mass                    | Species                              | Accession    | Aa identity | E Value  | Alignment length in aa (Start-end position) |                                                                                             |                                                                             |                                                                 |
|    |          |        |        |     |                                                  |                                      |              |             |          |                                             |                                                                                             | Glyco_tranf_GTA_type(c111394,9.71e-18,150,5-154)                            | TETRATRICOPEPTIDE REPEAT PROTEIN, TPR(PTHR23083,1.6E-5,187-517) |
|    |          |        |        |     |                                                  |                                      |              |             |          |                                             |                                                                                             | TPR(c102429,1.76e-05,92,198-289)                                            | Nucleotide-diphospho-sugar transferases(SSF53448,8.3E-17,1-97)  |
| 41 | 27,161   | 27,523 | 363    | 120 | hypothetical protein PGCG_00186                  | Phaeocystis globosa virus            | YP_008052504 | 37.60%      | 5.25E-13 | 116(1-116)                                  |                                                                                             |                                                                             |                                                                 |
| 42 | 27,535   | 27,879 | 345    | 114 |                                                  |                                      |              |             |          |                                             |                                                                                             |                                                                             |                                                                 |
| 43 | 27,917   | 28,126 | 210    | 69  |                                                  |                                      |              |             |          |                                             |                                                                                             |                                                                             |                                                                 |
| 44 | 28,099   | 28,593 | 495    | 164 | hypothetical protein ACD_9C00040G0003            | uncultured bacterium                 | EKE19361     | 41.60%      | 2.89E-23 | 142(2-143)                                  |                                                                                             |                                                                             |                                                                 |
| 45 | 28,652   | 29,221 | 570    | 189 | hypothetical protein PGCG_00184                  | Phaeocystis globosa virus            | YP_008052502 | 39.60%      | 4.35E-32 | 182(5-186)                                  |                                                                                             |                                                                             |                                                                 |
| 46 | 29,404   | 29,700 | 297    | 98  |                                                  |                                      |              |             |          |                                             |                                                                                             |                                                                             |                                                                 |
| 47 | 30,054   | 30,881 | 828    | 275 | putative DNA N6-adenine methyltransferase        | Cafeteria roenbergensis virus BV-PW1 | YP_003969706 | 60.70%      | 5.99E-90 | 272(2-273)                                  | AdoMet_MTases Superfamily(c117173,1.38e-06,91,38-128)                                       | S-adenosyl-L-methionine-dependent methyltransferases(SSF53335,1.0E-9,6-179) |                                                                 |
|    |          |        |        |     | hypothetical protein                             | Sphingomonas echinoides              | WP_010402503 | 31.90%      | 1.69E-28 | 258(12-269)                                 |                                                                                             |                                                                             |                                                                 |

| ID | Position |        | Length |     | BlastP hit in GenBank nr and/or viruses data set |                               |              |             |          |                                             | NCBI conserved domain (ID, E-value, alignment length in aa, alignment start - end position) | Interproscan matches (ID, E-value, alignment start - end position) |
|----|----------|--------|--------|-----|--------------------------------------------------|-------------------------------|--------------|-------------|----------|---------------------------------------------|---------------------------------------------------------------------------------------------|--------------------------------------------------------------------|
|    | start    | end    | nt     | aa  | ORF, protein encoded, or mass                    | Species                       | Accession    | Aa identity | E Value  | Alignment length in aa (Start-end position) |                                                                                             |                                                                    |
| 48 | 30,963   | 31,688 | 726    | 241 | hypothetical protein PGCG_00183                  | Phaeocystis globosa virus     | YP_008052501 | 33.50%      | 3.92E-28 | 212(5-216)                                  |                                                                                             | transmembrane_regions(tmhmm,-1.0,37-71)                            |
| 49 | 31,708   | 32,832 | 1,125  | 374 | hypothetical protein PGCG_00181                  | Phaeocystis globosa virus     | YP_008052499 | 38.70%      | 5.95E-49 | 285(9-293)                                  |                                                                                             |                                                                    |
|    |          |        |        |     | GJ23634                                          | Drosophila virilis            | XP_002052993 | 35.30%      | 1.71E-02 | 68(279-346)                                 |                                                                                             |                                                                    |
| 50 | 32,878   | 33,258 | 381    | 126 | hypothetical protein                             | bacterium SCGC AAA164-N20     | WP_020036351 | 27.00%      | 3.28E-03 | 87(1-87)                                    |                                                                                             |                                                                    |
|    |          |        |        |     | hypothetical protein BpV1_089c                   | Bathycoccus sp. RCC1105 virus | YP_004061519 | 27.60%      | 3.91E-03 | 87(1-87)                                    |                                                                                             |                                                                    |
| 51 | 33,328   | 33,555 | 228    | 75  |                                                  |                               |              |             |          |                                             |                                                                                             | signal-peptide(SignalP-NN(euk),-1.0,1-22)                          |
|    |          |        |        |     |                                                  |                               |              |             |          |                                             |                                                                                             |                                                                    |
| 52 | 33,564   | 34,148 | 585    | 194 | hypothetical protein PGCG_00179                  | Phaeocystis globosa virus     | YP_008052497 | 46.90%      | 1.68E-44 | 162(1-162)                                  |                                                                                             |                                                                    |
| 53 | 34,250   | 35,266 | 1,017  | 338 | DNA-directed RNA polymerase II subunit D         | Phaeocystis globosa virus     | YP_008052496 | 42.00%      | 2.97E-79 | 316(3-318)                                  | RNAP_RPB11_RPB3(c111409,3.89 e-25,261,3-263)                                                | RBP11-like subunits of RNA polymerase(SSF55257,1.4E-18,2-273)      |



| ID | Position |        | Length |     | BlastP hit in GenBank nr and/or viruses data set |                                                        |                                     |             |          | NCBI conserved domain (ID, E-value, alignment length in aa, alignment start - end position) | Interproscan matches (ID, E-value, alignment start - end position) |                                             |                                                        |
|----|----------|--------|--------|-----|--------------------------------------------------|--------------------------------------------------------|-------------------------------------|-------------|----------|---------------------------------------------------------------------------------------------|--------------------------------------------------------------------|---------------------------------------------|--------------------------------------------------------|
|    | start    | end    | nt     | aa  | ORF, protein encoded, or mass                    | Species                                                | Accession                           | Aa identity | E Value  |                                                                                             |                                                                    | Alignment length in aa (Start-end position) |                                                        |
|    |          |        |        |     |                                                  | uncultured<br>DNA directed RNA<br>polymerase subunit D | organism<br>MedDCM-OCT-<br>S08-C195 | ADD95766    | 41.20%   | 4.13E-76                                                                                    | 315(1-315)                                                         | PRK00783(PRK00783,4.49e-<br>22,263,3-265)   | DNA-DIRECTED<br>POLYMERASE(PTHR11800,9.7E-9,2-<br>103) |
| 54 | 35,212   | 35,424 | 213    | 70  | DNA directed RNA<br>polymerase subunit D         | organism<br>MedDCM-OCT-<br>S08-C195                    | ADD95766                            | 38.60%      | 3.65E-07 | 57(14-70)                                                                                   |                                                                    |                                             |                                                        |
|    |          |        |        |     | DNA-directed RNA<br>polymerase II subunit<br>D   | Phaeocystis<br>globosa virus                           | YP_008052496                        | 33.30%      | 3.57E-02 | 57(14-70)                                                                                   |                                                                    |                                             |                                                        |
| 55 | 35,637   | 36,620 | 984    | 327 | hypothetical protein<br>PGCG_00176               | Phaeocystis<br>globosa virus                           | YP_008052494                        | 40.40%      | 1.89E-56 | 306(18-323)                                                                                 | RNA_lig_T4_1(cl09743,1.29e-<br>05,122,17-138)                      |                                             |                                                        |
| 56 | 36,829   | 37,071 | 243    | 80  | predicted protein                                | Naegleria gruberi                                      | XP_002671015                        | 23.80%      | 2.53E-03 | 156(17-172)                                                                                 |                                                                    |                                             |                                                        |
| 57 | 37,415   | 37,582 | 168    | 55  |                                                  |                                                        |                                     |             |          |                                                                                             |                                                                    |                                             |                                                        |
| 58 | 37,572   | 38,105 | 534    | 177 | hypothetical protein<br>PGCG_00175               | Phaeocystis<br>globosa virus                           | YP_008052493                        | 46.40%      | 2.11E-10 | 81(5-85)                                                                                    |                                                                    |                                             |                                                        |
|    |          |        |        |     | lipoprotein                                      | Myxococcus<br>xanthus DK 1622                          | YP_630411                           | 65.60%      | 2.51E-04 | 32(96-127)                                                                                  |                                                                    |                                             |                                                        |
| 59 | 38,158   | 39,372 | 1,215  | 404 | hypothetical protein<br>PGCG_00175               | Phaeocystis<br>globosa virus                           | YP_008052493                        | 25.60%      | 3.04E-22 | 384(14-397)                                                                                 |                                                                    |                                             |                                                        |
| 60 | 39,375   | 41,225 | 1,851  | 616 | hypothetical protein<br>PGCG_00175               | Phaeocystis<br>globosa virus                           | YP_008052493                        | 31.10%      | 4.27E-73 | 603(7-609)                                                                                  |                                                                    |                                             |                                                        |
| 61 | 41,225   | 43,267 | 2,043  | 680 | hypothetical protein<br>PGCG_00175               | Phaeocystis<br>globosa virus                           | YP_008052493                        | 30.50%      | 2.88E-59 | 665(3-667)                                                                                  |                                                                    |                                             |                                                        |

| ID | Position |        | Length |     | BlastP hit in GenBank nr and/or viruses data set   |                               |              |             |          | NCBI conserved domain (ID, E-value, alignment length in aa, alignment start - end position) | Interproscan matches (ID, E-value, alignment start - end position) |
|----|----------|--------|--------|-----|----------------------------------------------------|-------------------------------|--------------|-------------|----------|---------------------------------------------------------------------------------------------|--------------------------------------------------------------------|
|    | start    | end    | nt     | aa  | ORF, protein encoded, or mass                      | Species                       | Accession    | Aa identity | E Value  |                                                                                             |                                                                    |
| 62 | 43,360   | 43,608 | 249    | 82  | hypothetical protein                               | Marine Group II euryarchaeote | WP_018036027 | 51.90%      | 1.31E-14 | 79(4-82)                                                                                    | signal-peptide(SignalP-NN(euk),-1.0,1-31)                          |
|    |          |        |        |     |                                                    | SCGC AB-629-J06               |              |             |          |                                                                                             |                                                                    |
| 63 |          |        |        |     | hypothetical protein PGCG_00174                    | Phaeocystis globosa virus     | YP_008052492 | 46.80%      | 3.72E-13 | 77(6-82)                                                                                    | transmembrane_regions(tmhmm,-1.0,10-28;53-75)                      |
|    | 43,713   | 44,654 | 942    | 313 | hypothetical protein PGCG_00173                    | Phaeocystis globosa virus     | YP_008052491 | 21.60%      | 4.26E-05 | 287(6-292)                                                                                  | signal-peptide(SignalP-NN(euk),-1.0,1-21)                          |
| 64 |          |        |        |     |                                                    |                               |              |             |          |                                                                                             | transmembrane_regions(tmhmm,-1.0,5-20;39-59;74-96;252-272)         |
|    | 44,809   | 45,060 | 252    | 83  | PREDICTED: VPS10 domain-containing receptor SorCS2 | Chrysemys picta bellii        | XP_005300817 | 35.00%      | 6.83E-02 | 58(15-72)                                                                                   | signal-peptide(SignalP-NN(euk),-1.0,1-29)                          |
| 65 |          |        |        |     | hypothetical protein PGCG_00172                    | Phaeocystis globosa virus     | YP_008052490 | 35.40%      | 5.80E-05 | 78(3-80)                                                                                    | transmembrane_regions(tmhmm,-1.0,10-30)                            |
|    | 45,093   | 46,172 | 1,080  | 359 | hypothetical protein PGCG_00171                    | Phaeocystis globosa virus     | YP_008052489 | 25.40%      | 2.31E-05 | 217(27-243)                                                                                 |                                                                    |
| 66 | 46,423   | 46,656 | 234    | 77  | hypothetical protein 162300232                     | Organic Lake phycodnavirus 2  | ADX06292     | 40.80%      | 6.10E-13 | 76(1-76)                                                                                    | signal-peptide(SignalP-NN(euk),-1.0,1-26)                          |

| ID | Position |        | Length |     | BlastP hit in GenBank nr and/or viruses data set              |                                |              |             |          |                                             | NCBI conserved domain (ID, E-value, alignment length in aa, alignment start - end position) | Interproscan matches (ID, E-value, alignment start - end position) |
|----|----------|--------|--------|-----|---------------------------------------------------------------|--------------------------------|--------------|-------------|----------|---------------------------------------------|---------------------------------------------------------------------------------------------|--------------------------------------------------------------------|
|    | start    | end    | nt     | aa  | ORF, protein encoded, or mass                                 | Species                        | Accession    | Aa identity | E Value  | Alignment length in aa (Start-end position) |                                                                                             |                                                                    |
|    |          |        |        |     |                                                               |                                |              |             |          |                                             |                                                                                             | transmembrane_regions(tmhmm,-1.0,5-25)                             |
| 67 | 46,747   | 46,995 | 249    | 82  | hypothetical protein PGCG_00169                               | Phaeocystis globosa virus      | YP_008052487 | 40.00%      | 3.20E-11 | 77(6-82)                                    |                                                                                             | signal-peptide(SignalP-NN(euk),-1.0,1-28)                          |
|    |          |        |        |     |                                                               |                                |              |             |          |                                             |                                                                                             | transmembrane_regions(tmhmm,-1.0,15-35)                            |
| 68 | 47,027   | 47,431 | 405    | 134 | hypothetical protein PGCG_00168                               | Phaeocystis globosa virus      | YP_008052486 | 42.10%      | 1.53E-08 | 90(41-130)                                  |                                                                                             |                                                                    |
| 69 | 47,675   | 48,169 | 495    | 164 |                                                               |                                |              |             |          |                                             |                                                                                             |                                                                    |
| 70 | 48,233   | 48,409 | 177    | 58  |                                                               |                                |              |             |          |                                             |                                                                                             | transmembrane_regions(tmhmm,-1.0,26-46)                            |
| 71 | 48,630   | 48,806 | 177    | 58  |                                                               |                                |              |             |          |                                             | Patatin_and_cPLA2(c111396,2.04e-03,42,1-42)                                                 |                                                                    |
| 72 | 48,836   | 49,108 | 273    | 90  |                                                               |                                |              |             |          |                                             |                                                                                             | transmembrane_regions(tmhmm,-1.0,46-64)                            |
|    |          |        |        |     | Similar to                                                    |                                |              |             |          |                                             |                                                                                             |                                                                    |
|    |          |        |        |     | Uncharacterized RING finger protein P4H10.07; acc. no. Q9P7E1 | Pyronema omphalodes CBS 100304 |              |             |          |                                             |                                                                                             |                                                                    |
| 73 | 49,201   | 49,533 | 333    | 110 |                                                               |                                | CBS CCX29987 | 34.50%      | 2.22E-02 | 55(8-62)                                    |                                                                                             | transmembrane_regions(tmhmm,-1.0,87-107)                           |
| 74 | 49,819   | 50,169 | 351    | 116 | polyA polymerase catalytic subunit                            | Phaeocystis globosa virus      | YP_008052392 | 51.40%      | 4.57E-30 | 107(4-110)                                  |                                                                                             |                                                                    |

| ID | Position |        | Length |     | BlastP hit in GenBank nr and/or viruses data set           |                               |              |             |           |                                             | NCBI conserved domain (ID, E-value, alignment length in aa, alignment start - end position) | Interproscan matches (ID, E-value, alignment start - end position)      |
|----|----------|--------|--------|-----|------------------------------------------------------------|-------------------------------|--------------|-------------|-----------|---------------------------------------------|---------------------------------------------------------------------------------------------|-------------------------------------------------------------------------|
|    | start    | end    | nt     | aa  | ORF, protein encoded, or mass                              | Species                       | Accession    | Aa identity | E Value   | Alignment length in aa (Start-end position) |                                                                                             |                                                                         |
| 75 | 50,319   | 51,215 | 897    | 298 | polyA polymerase catalytic subunit                         | Phaeocystis globosa virus     | YP_008052392 | 54.70%      | 2.46E-87  | 247(52-298)                                 |                                                                                             |                                                                         |
|    | 51,118   | 52,224 | 1,107  | 368 | PREDICTED:<br>inactive phospholipase C-like protein 2-like | Xenopus (Silurana) tropicalis | XP_002942363 | 27.20%      | 6.63E-03  | 102(64-165)                                 | PI-PLC-X(c117177,2.99e-03,119,64-182)                                                       | PLC-like phosphodiesterases(SSF51695,4.3E-12,61-352)                    |
| 76 |          |        |        |     | hypothetical protein PGCG_00074                            | Phaeocystis globosa virus     | YP_008052393 | 29.70%      | 1.87E-33  | 347(8-354)                                  | PI-PLCc_GDPD_SF(c114615,4.87e-03,57,266-322)                                                |                                                                         |
|    | 52,275   | 53,966 | 1,692  | 563 | major capsid protein MCP2                                  | Phaeocystis globosa virus     | YP_008052394 | 47.60%      | 4.95E-158 | 562(1-562)                                  | Capsid_NCLDV(pfam04451,4.17e-12,271,289-559)                                                | Capsid_NCLDV(PF04451,3.6E-32,289-543)                                   |
| 77 |          |        |        |     |                                                            |                               |              |             |           |                                             | Group II dsDNA viruses VP(SSF49749,2.0E-33,25-309;4.3E-12,419-563)                          |                                                                         |
|    |          |        |        |     |                                                            |                               |              |             |           |                                             |                                                                                             | African swine fever virus, p72, major capsid(2.70.9.20,2.6E-18,423-562) |
| 78 | 54,083   | 54,361 | 279    | 92  |                                                            |                               |              |             |           |                                             |                                                                                             |                                                                         |
|    | 54,301   | 54,780 | 480    | 159 | hypothetical protein                                       | Arthrospira platensis         | WP_006624940 | 34.40%      | 3.30E-02  | 64(48-111)                                  |                                                                                             |                                                                         |
| 79 |          |        |        |     | hypothetical protein PSSM2_192                             | Prochlorococcus phage P-SSM2  | YP_214424    | 30.80%      | 5.54E-04  | 65(47-111)                                  |                                                                                             |                                                                         |

| ID | Position |        | Length |     | BlastP hit in GenBank nr and/or viruses data set    |                              |              |             |          |                                             | NCBI conserved domain (ID, E-value, alignment length in aa, alignment start - end position) | Interproscan matches (ID, E-value, alignment start - end position)           |
|----|----------|--------|--------|-----|-----------------------------------------------------|------------------------------|--------------|-------------|----------|---------------------------------------------|---------------------------------------------------------------------------------------------|------------------------------------------------------------------------------|
|    | start    | end    | nt     | aa  | ORF, protein encoded, or mass                       | Species                      | Accession    | Aa identity | E Value  | Alignment length in aa (Start-end position) |                                                                                             |                                                                              |
| 80 | 54,883   | 55,683 | 801    | 266 | D12 class N6 adenine-specific DNA methyltransferase | Cyanothece sp. PCC 7425      | WP_012629081 | 38.10%      | 7.78E-55 | 257(6-262)                                  | MethyltransfD12(cI17344,1.00e-23,242,3-244)                                                 | MethyltransfD12(PF02086,1.2E-25,10-247)                                      |
|    |          |        |        |     |                                                     |                              |              |             |          |                                             |                                                                                             | S-adenosyl-L-methionine-dependent methyltransferases(SSF53335,5.8E-36,1-262) |
| 81 | 55,794   | 56,366 | 573    | 190 | hypothetical protein                                | Desulfotomaculum acetoxidans | WP_015759445 | 27.70%      | 1.27E-02 | 151(1-151)                                  |                                                                                             | signal-peptide(SignalP-NN(euk),-1.0,1-18)                                    |
|    | 56,398   | 56,958 | 561    | 186 |                                                     |                              |              |             |          |                                             |                                                                                             | signal-peptide(SignalP-NN(euk),-1.0,1-50)                                    |
| 82 |          |        |        |     |                                                     |                              |              |             |          |                                             |                                                                                             | transmembrane_regions(tmhmm , -1.0,27-47;159-179)                            |
|    | 57,005   | 57,418 | 414    | 137 |                                                     |                              |              |             |          |                                             |                                                                                             | signal-peptide(SignalP-NN(euk),-1.0,1-16)                                    |
| 83 |          |        |        |     |                                                     |                              |              |             |          |                                             |                                                                                             | transmembrane_regions(tmhmm , -1.0,5-25;71-91;112-132)                       |
|    | 57,615   | 58,127 | 513    | 170 | hypothetical protein                                | Prochlorothrix hollandica    | WP_017711778 | 43.40%      | 3.04E-03 | 74(47-120)                                  |                                                                                             |                                                                              |



| ID | Position |        | Length |     | BlastP hit in GenBank nr and/or viruses data set |                              |              |             |           |                                             | NCBI conserved domain (ID, E-value, alignment length in aa, alignment start - end position) | Interproscan matches (ID, E-value, alignment start - end position) |
|----|----------|--------|--------|-----|--------------------------------------------------|------------------------------|--------------|-------------|-----------|---------------------------------------------|---------------------------------------------------------------------------------------------|--------------------------------------------------------------------|
|    | start    | end    | nt     | aa  | ORF, protein encoded, or mass                    | Species                      | Accession    | Aa identity | E Value   | Alignment length in aa (Start-end position) |                                                                                             |                                                                    |
| 90 | 61,596   | 61,949 | 354    | 117 | hypothetical protein 162300258                   | Organic Lake phycodnavirus 2 | ADX06305     | 35.60%      | 6.90E-09  | 102(7-108)                                  |                                                                                             | signal-peptide(SignalP-NN(euk),-1.0,1-32)                          |
|    |          |        |        |     |                                                  |                              |              |             |           |                                             |                                                                                             | transmembrane_regions(tmhmm , -1.0,9-29)                           |
| 91 | 61,985   | 62,473 | 489    | 162 | hypothetical protein PGCG_00050                  | Phaeocystis globosa virus    | YP_008052369 | 44.70%      | 3.47E-37  | 159(4-162)                                  |                                                                                             |                                                                    |
| 92 | 62,489   | 63,508 | 1,020  | 339 | alanine racemase                                 | Kribbella flavida DSM 17836  | YP_003383843 | 35.80%      | 6.89E-50  | 338(1-338)                                  | Alr(COG0787,6.01e-88,338,1-338)                                                             | alr: alanine racemase(TIGR00492,3.7E-79,1-337)                     |
| 93 | 63,853   | 65,310 | 1,458  | 485 | DNA gyrase/DNA topoisomerase IV subunit A        | Phaeocystis globosa virus    | YP_008052370 | 51.10%      | 8.06E-138 | 468(2-469)                                  | TOP4c(smart00434,2.92e-115,435,1-435)                                                       | DNA TOPOISOMERASE/GYRASE(PTHR10169,1.2E-169,1-478)                 |
|    |          |        |        |     | hypothetical protein GUITHDRAFT_158481           | Guillardia theta CCMP2712    | EKX38687     | 40.50%      | 2.79E-100 | 440(1-440)                                  |                                                                                             | DNA_topoisoIV(PF00521,4.2E-102,1-440)                              |
| 94 | 65,433   | 67,364 | 1,932  | 643 | DNA gyrase/DNA topoisomerase IV subunit A        | Phaeocystis globosa virus    | YP_008052370 | 63.30%      | 0         | 633(2-634)                                  | TOP2c(smart00433,1.45e-153,553,57-609)                                                      | DNA TOPOISOMERASE/GYRASE(PTHR10169,4.8E-248,4-634)                 |
| 95 | 67,420   | 67,701 | 282    | 93  | DNA topoisomerase II                             | Galdieria sulphuraria        | XP_005709173 | 46.10%      | 2.19E-171 | 625(10-634)                                 |                                                                                             | TopoisomeraseII(SM00433,1.7E-142,57-637)                           |
| 96 | 67,738   | 68,175 | 438    | 145 | hypothetical protein PGCG_00095                  | Phaeocystis globosa virus    | YP_008052414 | 57.90%      | 2.88E-18  | 95(1-95)                                    |                                                                                             |                                                                    |

| ID  | Position |        | Length |     | BlastP hit in GenBank nr and/or viruses data set |                                           |              |             |           |                                             | NCBI conserved domain (ID, E-value, alignment length in aa, alignment start - end position) | Interproscan matches (ID, E-value, alignment start - end position)        |
|-----|----------|--------|--------|-----|--------------------------------------------------|-------------------------------------------|--------------|-------------|-----------|---------------------------------------------|---------------------------------------------------------------------------------------------|---------------------------------------------------------------------------|
|     | start    | end    | nt     | aa  | ORF, protein encoded, or mass                    | Species                                   | Accession    | Aa identity | E Value   | Alignment length in aa (Start-end position) |                                                                                             |                                                                           |
|     |          |        |        |     | EsV-1-52                                         | Ectocarpus siliculosus                    | CBN80356     | 67.40%      | 3.49E-05  | 43(23-65)                                   |                                                                                             |                                                                           |
| 97  | 68,309   | 69,949 | 1,641  | 546 | hypothetical protein 162322300                   | Organic Lake phycodnavirus 1              | ADX05824     | 30.00%      | 1.49E-34  | 437(89-525)                                 |                                                                                             |                                                                           |
|     | 69,970   | 70,599 | 630    | 209 |                                                  |                                           |              |             |           |                                             |                                                                                             | signal-peptide(SignalP-NN(euk),-1.0,1-27)                                 |
| 98  |          |        |        |     |                                                  |                                           |              |             |           |                                             |                                                                                             | transmembrane_regions(tmhmm ,-1.0,9-27)                                   |
| 99  | 70,714   | 71,220 | 507    | 168 |                                                  |                                           |              |             |           |                                             |                                                                                             |                                                                           |
| 100 | 71,385   | 71,831 | 447    | 148 |                                                  |                                           |              |             |           |                                             |                                                                                             |                                                                           |
|     | 71,912   | 72,745 | 834    | 277 | putative proliferating cell nuclear antigen      | Phaeocystis globosa virus                 | YP_008052411 | 74.00%      | 4.59E-133 | 269(9-277)                                  | PCNA(c109515,2.58e-31,250,19-268)                                                           | pcna: proliferating cell nuclear antigen (pcna)(TIGR00590,3.8E-40,20-269) |
| 101 |          |        |        |     | hypothetical protein                             | Verrucomicrobia bacterium SCGC AAA164-N20 | WP_020036354 | 32.60%      | 8.89E-37  | 257(17-273)                                 |                                                                                             |                                                                           |
| 102 | 72,830   | 73,291 | 462    | 153 | hypothetical protein, partial                    | Bacillus cereus                           | WP_000464019 | 70.60%      | 1.11E-14  | 68(25-92)                                   |                                                                                             |                                                                           |



**Table S3** Putative emrE in YSLPV1-2 predicted by using HHpred

| Protein Name  | Best Hit | Description                | E-value | Probabilities |
|---------------|----------|----------------------------|---------|---------------|
| YSLPV1-ORF29  | 3b5d_A   | Multidrug transporter EMRE | 4.2E-29 | 100           |
| YSLPV1-ORF218 | 3b5d_A   | Multidrug transporter EMRE | 1.4E-04 | 97.4          |
| YSLPV2-ORF158 | 3b5d_A   | Multidrug transporter EMRE | 8.6E-27 | 99.9          |
| YSLPV2-ORF210 | 3b5d_A   | Multidrug transporter EMRE | 2.1E-29 | 100           |

**Table S4** Homologs shared between virophages and giant viruses

| Query (Virophage) |                                                      | Subject (Giant Virus)                      |                                                | E value                    | identity         |
|-------------------|------------------------------------------------------|--------------------------------------------|------------------------------------------------|----------------------------|------------------|
| Name              | Gene product                                         | Name                                       | Gene product                                   |                            |                  |
| Sputnik           | V3 FtsK–HerA superfamily ATPase                      | Acanthamoeba polyphaga mimivirus           | MIMI L712                                      | 0.01                       | 54%              |
|                   | V6 Collagen triple-helixrepeat-containing protein    |                                            | MIMI R196                                      | 4.00E-19                   | 53%              |
|                   | V7 Collagen triple-helixrepeat-containing protein    |                                            | MIMI R239                                      | 0.001                      | 27%              |
|                   | V12                                                  |                                            | MIMI R546                                      | 5.00E-42                   | 64%              |
|                   | V13 DNA-polymerase                                   |                                            | MIMI L207/206                                  | 4.00E-12                   | 29%              |
|                   | Organic lake virophage                               |                                            | OLV17 putative transmembrane protein           | Organic Lake phycodnavirus | OLPV Lipoprotein |
|                   | OLV18 hp                                             |                                            | OLPV Cyanothece sp. cce_0037-like protein      | 2.00E-33                   | 65%              |
|                   | OLV19 hp                                             |                                            | OLPV Lipoprotein                               | 9.00E-33                   | 65%              |
|                   | OLV20 Collagen triple-helixrepeat-containing protein |                                            | OLPV hp                                        | 1.00E-07                   | 32%              |
| Mavirus           | OLV22 putative superfamily 3 helicase                | Cafeteria roenbergensis virus              | OLPV hp                                        | 5.00E-31                   | 56%              |
|                   | hypothetical protein                                 |                                            | putative ubiquitin carboxyl-terminal hydrolase | 2.00E-04                   | 32%              |
|                   | putative cysteine protease                           |                                            | putative cysteine protease                     | 7.00E-06                   | 25%              |
|                   | Ace lake mavirus                                     |                                            | ORF02 D5-like helicase-primase                 | Crov319 hp                 | 1.00E-04         |
|                   | ORF13 hp                                             |                                            | CroV276 hp                                     | 3.00E-08                   | 39%              |
| YSLV1             | ORF28                                                | Yellowstone Lake phycodnavirus, -mimivirus | YSLGV-ORF11                                    | 2.33E-05                   | 38%              |
|                   |                                                      |                                            | YSLPV1-ORF55                                   | 2.45E-09                   | 40%              |
|                   |                                                      |                                            | YSLPV2-ORF123                                  | 1.31E-05                   | 30.70%           |

| Query (Virophage) |                                    | Subject (Giant Virus)                         |                                               | E value  | identity |
|-------------------|------------------------------------|-----------------------------------------------|-----------------------------------------------|----------|----------|
| Name              | Gene product                       | Name                                          | Gene product                                  |          |          |
|                   |                                    |                                               | YSLPV3-ORF59                                  | 2.33E-08 | 39.70%   |
|                   | ORF07                              |                                               | YSLPV1-ORF226                                 | 2.67E-13 | 24.70%   |
|                   |                                    |                                               | YSLPV3-ORF89                                  | 8.30E-16 | 29.20%   |
|                   | ORF15                              |                                               | YSLGV-ORF11                                   | > E-02   | 30.80%   |
|                   | ORF22                              |                                               | YSLPV2-ORF04                                  | > E-02   | 24.30%   |
| YSLV2             | ORF05                              | Yellowstone Lake phycodnavirus, - giant virus | YSLPV1-ORF99                                  | > E-02   | 29.40%   |
|                   | ORF06<br>Methyltransferase domain? |                                               | OLPV2 hp                                      | 6.07E-07 | 50.00%   |
|                   | ORF20 OLV2 homolog                 |                                               | YSLGV-ORF11                                   | > E-02   | 33.30%   |
|                   |                                    |                                               | YSLPV1-ORF55                                  | 2.69E-10 | 38.80%   |
|                   |                                    |                                               | YSLPV2-ORF123                                 | 9.19E-09 | 40%      |
|                   |                                    |                                               | YSLPV3-ORF59                                  | 4.17E-15 | 38.80%   |
| YSLV3             | ORF03 OLV2 homolog                 | Yellowstone Lake phycodnavirus, - giant virus | YSLGV-ORF11                                   | 1.76E-05 | 35.50%   |
|                   | ORF07 methylase                    |                                               | YSLGV-ORF30 site-specific methyltransferase   | 1.22E-04 | 35.70%   |
|                   |                                    |                                               | YSLPV1-ORF236 site-specific methyltransferase | 7.68E-10 | 25.30%   |
|                   | ORF16                              |                                               | YSLPV1-ORF86 Serine/threonine-protein kinase  | > E-02   | 31.50%   |
| YSLV4             | ORF26 OLV2 homolog                 | Yellowstone Lake phycodnavirus, - giant virus | YSLGV-ORF11                                   | 8.75E-24 | 53.30%   |
|                   |                                    |                                               | YSLPV1-ORF55                                  | 5.34E-04 | 39.10%   |
|                   |                                    |                                               | YSLPV2-ORF123                                 | 5.35E-05 | 32.90%   |
|                   |                                    |                                               | YSLPV3-ORF59                                  | 4.82E-06 | 35.20%   |
|                   | ORF30                              |                                               | YSLPV3-ORF236                                 | > E-02   | 31.10%   |

| Query (Virophage) |                           | Subject (Giant Virus)                        |                                                  | E value  | identity |
|-------------------|---------------------------|----------------------------------------------|--------------------------------------------------|----------|----------|
| Name              | Gene product              | Name                                         | Gene product                                     |          |          |
|                   | ORF32 N-Acetyltransferase |                                              | YSLPV2-ORF184<br>GNAT family acetyltransferase ? | 1.08E-04 | 27.10%   |
|                   |                           |                                              | YSLPV3-ORF39<br>GNAT family acetyltransferase ?  | 1.09E-05 | 29.90%   |
|                   | ORF04 RNR2                |                                              | YSLPV1-ORF82 RNR2                                | 1.07E-91 | 50.50%   |
|                   |                           |                                              | YSLPV2-ORF94 RNR2                                | 1.07E-95 | 51.30%   |
|                   |                           |                                              | YSLPV3-ORF92<br>RNR2                             | 2.83E-95 | 50.80%   |
| YSLV6             | ORF18 OLV2 homolog        | Yellowstone lake phycodnavirus, -giant virus | YSLGV-ORF11                                      | 1.56E-11 | 37.80%   |
|                   |                           |                                              | YSLPV1-ORF55                                     | 2.01E-04 | 37.30%   |
|                   |                           |                                              | YSLPV2-ORF123                                    | 1.50E-06 | 37.80%   |
|                   |                           |                                              | YSLPV3-ORF59                                     | 1.39E-05 | 37.10%   |

**Table S5** Homologs shared between PgVV and virophages

| PgVV gene product | *aa length | Blast hits(aa length) | E-value  | Pairwise identity |
|-------------------|------------|-----------------------|----------|-------------------|
| 01                | 86         | OLV2(122)             | 1.44E-08 | 35.1%             |
|                   |            | YSLV4-ORF26(227)      | 3.40E-08 | 36.7%             |
| 02                | 216        | Mavirus(165)          | 1.52E-10 | 33.1%             |
|                   |            | OLV1                  | 1.68E-07 | 25.3%             |
| 04                | 707        | OLV(776)              | 4.65E-38 | 23.6%             |
|                   |            | YSLV1-ORF04(766)      | 4.59E-24 | 25.3%             |
|                   |            | Zamilon(778)          | 6.80E-21 | 29.8%             |
|                   |            | V13(779)              | 7.51E-19 | 27.0%             |
|                   |            | Sputnik 3(779)        | 7.51E-19 | 27.0%             |
| 06                | 729        | YSLV4-ORF25(421)      | 1.31E-02 | 27.2%             |
| 11                | 199        | Mavirus(165)          | 3.92E-04 | 43.8%             |

\*aa means amino acid

### **Legends of supporting figure**

**Figure S1.** Coverage of sequence assembly of four genomic sequences. Blue represents abundances of reads mapped onto the genomes. Numbers on the scale bar represent minimum and maximum sequences mapped onto the genome, respectively. Numbers on consensus and YSLPVs/YSLGV genomic sequences represent position of base pairs.

**Figure S2.** Encoding information of four YSL sequences summarized from BLASTp results. Numbers indicate percentage of ORFans and non-ORFans in four genomic sequences.

**Figure S3.** Unrooted phylogenetic tree reconstructed using amino acid sequences of three conserved genes of VLTF3 (A), Topoisomerase II (B) and VV A32-like packaging ATPase (C) in YSLPVs, YSLGV and selected other giant virus families. YSLPVs and YSLGV are indicated in blue. Phycodnaviridae and Mimiviridae are marked with lines. Bootstrap values (100 iterations) are indicated on the branching of the tree.

**Figure. S1**

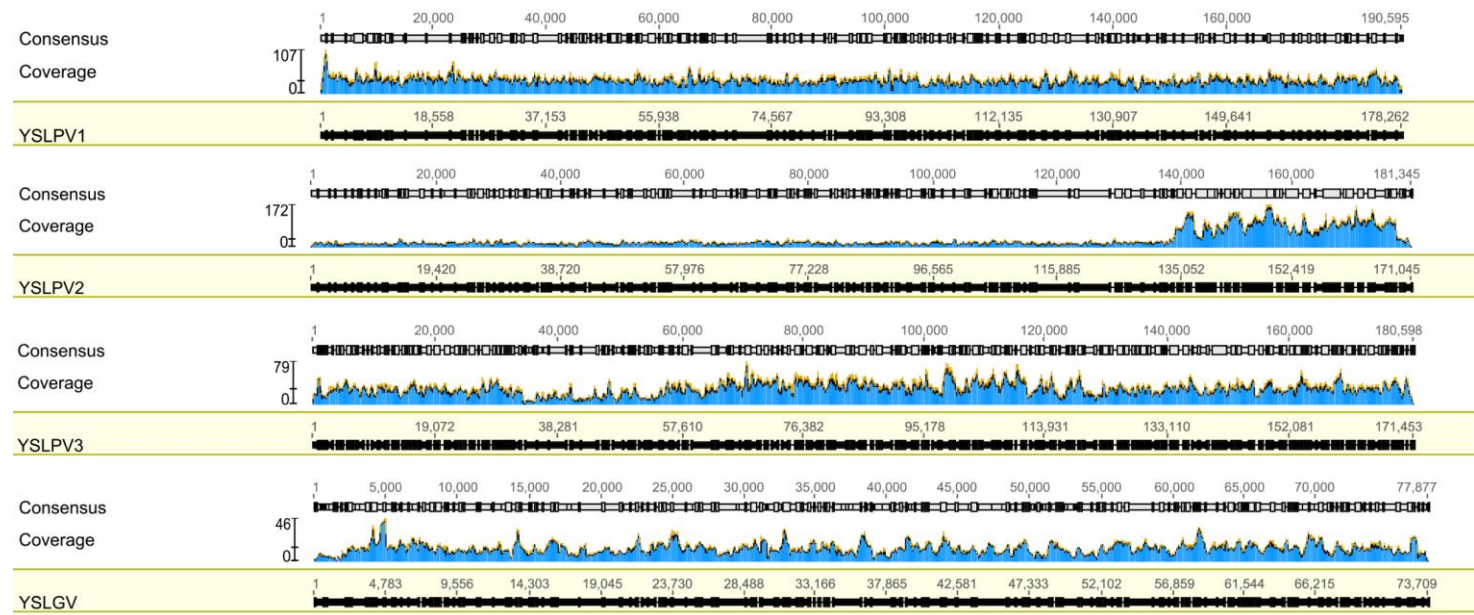

Figure. S2

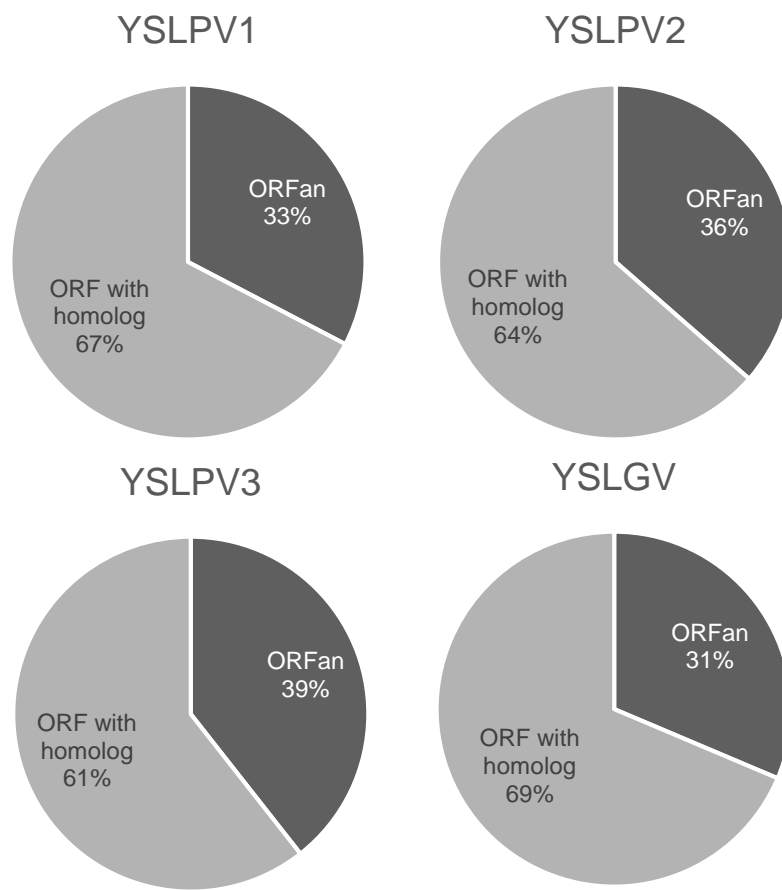



Figure. S3

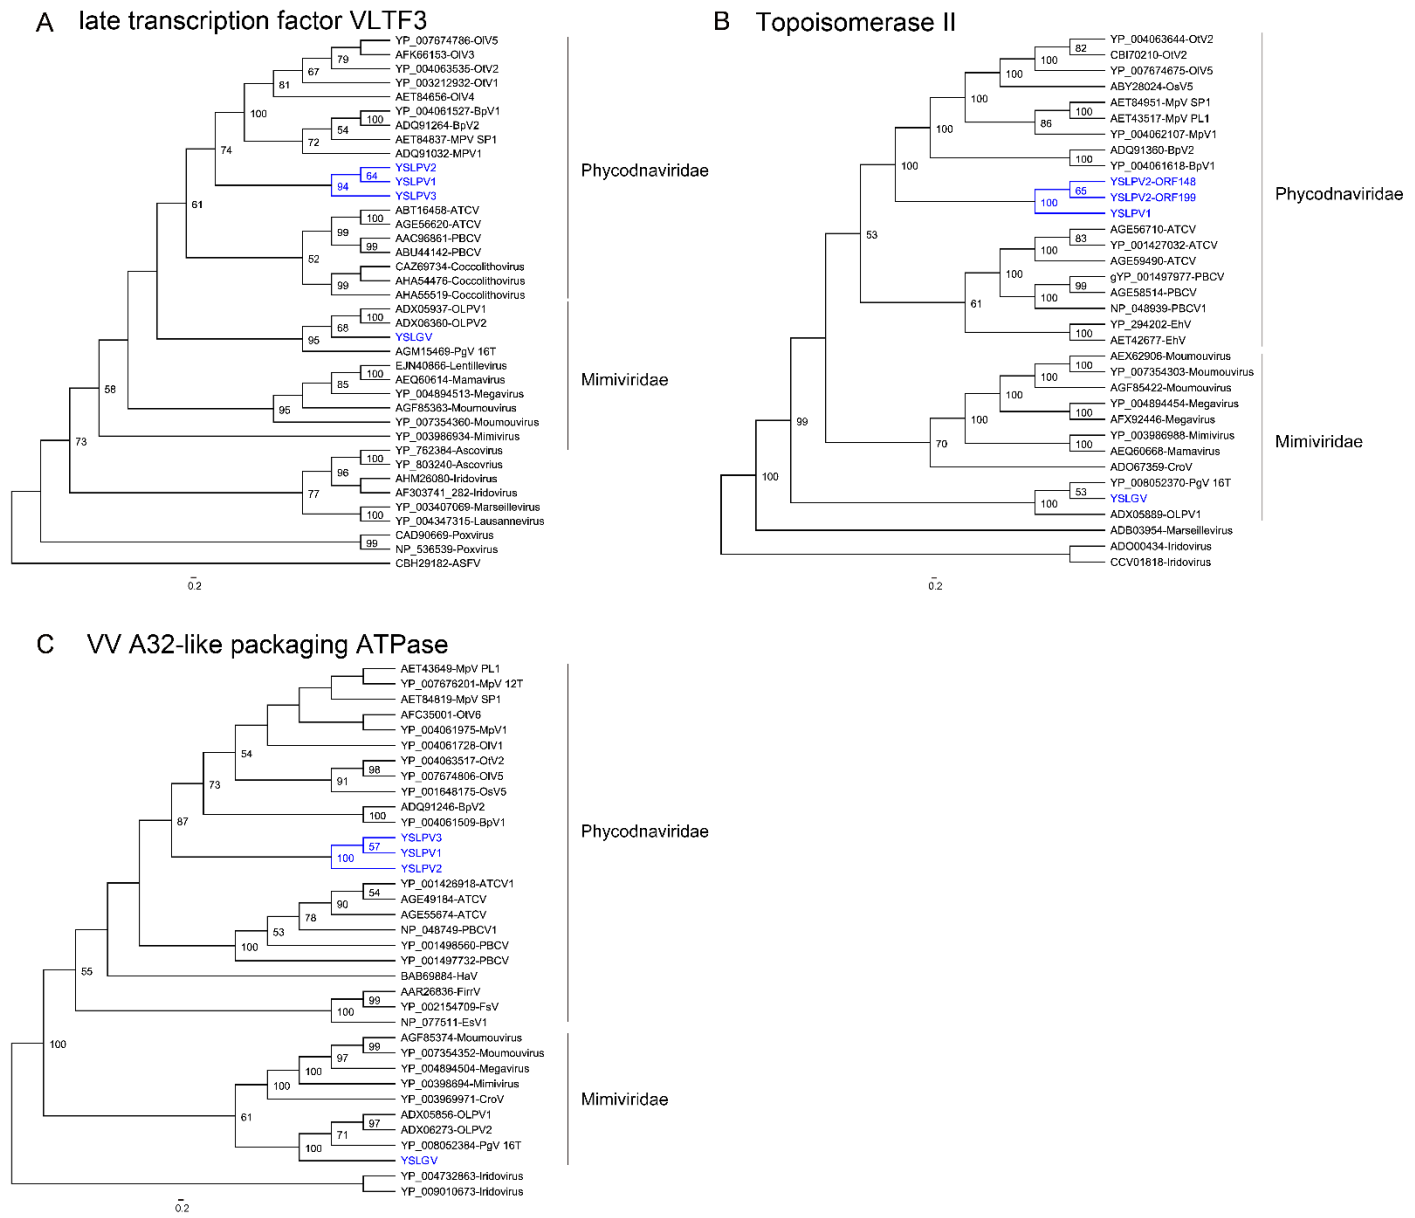

Supplement: srep15131-s1.pdf [file srep15131-s1.pdf]
